# Supplementary material for: Opening the silole ring: Efficient and specific cleavage of the endo-C(sp2)-Si bond with AcOH/ROH system
Source: Royal Society of Chemistry journal article supplement (doi:10.1039/c1sc00356a), 2011-01-01

## *Supporting Information*

# **Opening the Silole Ring: Efficient and Specific Cleavage of the *endo*-C(*sp*<sup>2</sup>)-Si Bond with AcOH/ROH System**

Qian Luo,<sup>[a]</sup> Chao Wang,<sup>[b]</sup> Yuexing Li,<sup>[a]</sup> Kunbing Ouyang,<sup>[a]</sup> Li Gu,<sup>[a]</sup> Masanobu Uchiyama,<sup>[b]</sup>  
and Zhenfeng Xi\*<sup>[a, c]</sup>

- a)** Beijing National Laboratory for Molecular Sciences (BNLMS), Key Laboratory of Bioorganic Chemistry and Molecular Engineering of Ministry of Education, College of Chemistry, Peking University, Beijing 100871, China.  
Fax: (+86)10-6275-1708; E-mail: [zfxi@pku.edu.cn](mailto:zfxi@pku.edu.cn)
- b)** Graduate School of Pharmaceutical Sciences, The University of Tokyo, 7-3-1 Hongo, Bunkyo-ku, Tokyo 113-0033, Japan, and ASI, RIKEN, 2-1 Hirosawa, Wako-shi, Saitama-ken, 351-0198, Japan.  
Fax: (+81)3-5841-0732; E-mail: [chaowang@riken.jp](mailto:chaowang@riken.jp), [uchiyama@mol.f.u-tokyo.ac.jp](mailto:uchiyama@mol.f.u-tokyo.ac.jp)
- c)** State Key Laboratory of Organometallic Chemistry, SIOC, CAS, Shanghai 200032 (China)

## *Table of Contents*

|                                                                                |      |
|--------------------------------------------------------------------------------|------|
| <b>1. Experiment Section</b>                                                   | S-2  |
| 1-1. General methods                                                           | S-2  |
| 1-2. Experimental procedure and spectral data for all compounds                | S-2  |
| <b>2. Calculation Section</b>                                                  | S-7  |
| 2-1. Full/detailed citations                                                   | S-7  |
| 2-2. General methods                                                           | S-7  |
| 2-3. Geometry optimization (Cartesian coordinates and total electron energies) | S-8  |
| 2-4. HOMO orbital and NPA analysis for silole molecule                         | S-12 |
| 2-5. NBO Analysis for Donor-acceptor Interaction                               | S-14 |
| <b>3. Copies for NMR spectrums for all compounds</b>                           | S-22 |

## 1. Experiment Section

### 1-1. General methods

All reactions were carried out under a slightly positive pressure of dry nitrogen by using standard Schlenk line techniques or under a nitrogen atmosphere in a Mikrouna Super (1220/750) Glovebox. The nitrogen in the glovebox was constantly circulated through a copper/molecular sieves catalyst unit. The oxygen and moisture concentrations in the glovebox atmosphere were monitored by an O<sub>2</sub>/H<sub>2</sub>O Combi-Analyzer to ensure both were always below 1 ppm. Unless otherwise noted, all starting materials were commercially available and were used without further purification. Solvents were distilled from sodium/benzophenone ketyl under a nitrogen atmosphere. Silole compounds were synthesized by reported methods.<sup>1-5</sup> NMR spectra were recorded on a JEOL-AL300 spectrometer (FT, 300 MHz for <sup>1</sup>H; 75 MHz for <sup>13</sup>C) or a Bruker-400 spectrometer (FT, 400 MHz for <sup>1</sup>H; 100 MHz for <sup>13</sup>C) at room temperature.

### 1-2. Experimental procedure and spectral data for all compounds

**Typical procedure for ring-opening reaction of siloles 1 or 3 catalyzed by acetic acid:** with magnetic stirring, a mixture of alcohol or phenol (neat, 10 mmol or more), silole **1** or **3** (1 mmol) and acetic acid (0.009 mL, 0.15 mmol, d 1.05) was maintained at room temperature for 2 hours. After that, water (10 mL) was added and the mixture was extracted by diethyl ether (30 mL in total) for three times. The combined organic solution was washed with brine and dried over Na<sub>2</sub>SO<sub>4</sub>. Solvent was removed in vacuum and the residue was purified by column chromatography (silicon gel., hexane) to give diene products **2** or **4**.

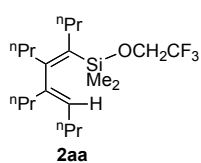

Colorless liquid, isolated yield 75% (284 mg); <sup>1</sup>H NMR (300 MHz, CDCl<sub>3</sub>, 25 °C): δ = 0.19 (s, 6H, CH<sub>3</sub>), 0.88-0.97 (m, 12H, CH<sub>3</sub>), 1.29-1.47 (m, 8H, CH<sub>2</sub>), 2.01-2.15 (m, 8H, CH<sub>2</sub>), 3.87 (q, *J* = 8.7 Hz, 2H, CH<sub>2</sub>), 5.15 (t, *J* = 7.2 Hz, 1H, CH); <sup>13</sup>C NMR (75 MHz, CDCl<sub>3</sub>, 25 °C): δ = 0.54 (2 CH<sub>3</sub>), 14.11 (2 CH<sub>3</sub>), 14.53 (1 CH<sub>3</sub>), 14.97 (1 CH<sub>3</sub>), 21.73 (1 CH<sub>2</sub>), 22.19 (1 CH<sub>2</sub>), 22.75 (1 CH<sub>2</sub>), 24.17 (1 CH<sub>2</sub>), 30.34 (1 CH<sub>2</sub>), 32.78 (1 CH<sub>2</sub>), 33.00 (1 CH<sub>2</sub>), 33.30 (1 CH<sub>2</sub>), 61.25 (q, *J* = 35 Hz, 1 CH<sub>2</sub>), 124.55 (q, *J* = 277 Hz, 1 CF<sub>3</sub>), 129.44 (1 CH), 132.65 (1 quat. C), 142.97 (1 quat. C), 158.89 (1 quat. C); HRMS calcd. for C<sub>20</sub>H<sub>37</sub>F<sub>3</sub>OSi [M+Na]<sup>+</sup>: 401.2458, found 401.2466.

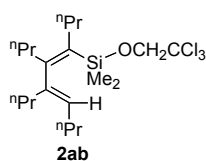

Colorless liquid, isolated yield 48% (205 mg); <sup>1</sup>H NMR (300 MHz, CDCl<sub>3</sub>, 25 °C): δ = 0.18 (s, 6H, CH<sub>3</sub>), 0.83-0.93 (m, 12H, CH<sub>3</sub>), 1.29-1.42 (m, 8H, CH<sub>2</sub>), 1.97-2.15 (m, 8H, CH<sub>2</sub>), 4.07 (s, 2H, CH<sub>2</sub>), 5.11 (t, *J* = 6.9 Hz, 1H, CH); <sup>13</sup>C NMR (75 MHz, CDCl<sub>3</sub>, 25 °C): δ = 0.84 (2 CH<sub>3</sub>), 14.06 (2 CH<sub>3</sub>), 14.56 (1 CH<sub>3</sub>), 14.92 (1 CH<sub>3</sub>), 21.56 (1 CH<sub>2</sub>), 22.04 (1 CH<sub>2</sub>), 22.62 (1 CH<sub>2</sub>), 24.03 (1 CH<sub>2</sub>), 30.22 (1 CH<sub>2</sub>), 32.58

(1 CH<sub>2</sub>), 32.90 (1 CH<sub>2</sub>), 33.20 (1 CH<sub>2</sub>), 76.28 (1 CH<sub>2</sub>), 99.36 (1 CCl<sub>3</sub>), 129.42 (1 CH), 133.11 (1 quat. C), 143.14 (1 quat. C), 158.46 (1 quat. C); HRMS calcd. for C<sub>20</sub>H<sub>37</sub>Cl<sub>3</sub>OSi [M+H]<sup>+</sup>: 427.1768, found 427.1776.

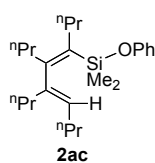

Colorless liquid, isolated yield 72% (268 mg); <sup>1</sup>H NMR (400 MHz, CDCl<sub>3</sub>, 25 °C): δ = 0.25 (s, 6H, CH<sub>3</sub>), 0.87-0.95 (m, 12H, CH<sub>3</sub>), 1.35-1.43 (m, 8H, CH<sub>2</sub>), 1.96-2.21 (m, 8H, CH<sub>2</sub>), 5.14 (t, *J* = 7.2 Hz, 1H, CH), 6.80 (d, *J* = 8.4 Hz, 2H, CH), 6.90 (t, *J* = 7.2 Hz, 1H, CH), 7.18-7.22 (m, 2H, CH); <sup>13</sup>C NMR (100 MHz, CDCl<sub>3</sub>, 25 °C): δ = 0.21 (2 CH<sub>3</sub>), 14.15 (1 CH<sub>3</sub>), 14.20 (1 CH<sub>3</sub>), 14.67 (1 CH<sub>3</sub>), 15.03 (1

CH<sub>3</sub>), 21.69 (1 CH<sub>2</sub>), 22.18 (1 CH<sub>2</sub>), 22.66 (1 CH<sub>2</sub>), 24.20 (1 CH<sub>2</sub>), 30.30 (1 CH<sub>2</sub>), 32.80 (1 CH<sub>2</sub>), 33.08 (1 CH<sub>2</sub>), 33.27 (1 CH<sub>2</sub>), 119.96 (2 CH), 120.70 (1 CH), 129.23 (2 CH), 129.48 (1 CH), 133.20 (1 quat. C), 142.85 (1 quat. C), 155.85 (1 quat. C), 158.41 (1 quat. C); HRMS calcd. for C<sub>20</sub>H<sub>40</sub>OSi [M+Na]<sup>+</sup>: 395.2756, found 395.2764.

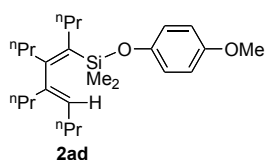

Colorless liquid, isolated yield 64% (258 mg); <sup>1</sup>H NMR (400 MHz, CDCl<sub>3</sub>, 25 °C): δ = 0.25 (s, 6H, CH<sub>3</sub>), 0.89-0.96 (m, 12H, CH<sub>3</sub>), 1.37-1.41 (m, 8H, CH<sub>2</sub>), 2.17-2.21 (m, 8H, CH<sub>2</sub>), 3.76 (s, 3H, CH<sub>3</sub>), 5.14 (t, *J* = 7.2 Hz, 1H, CH), 6.72-6.78 (m, 4H, CH); <sup>13</sup>C NMR (100 MHz, CDCl<sub>3</sub>, 25 °C): δ = 0.99 (2 CH<sub>3</sub>), 14.11 (1 CH<sub>3</sub>), 14.17 (1 CH<sub>3</sub>), 14.65 (1 CH<sub>3</sub>), 15.00 (1 CH<sub>3</sub>),

21.67 (1 CH<sub>2</sub>), 22.14 (1 CH<sub>2</sub>), 22.65 (1 CH<sub>2</sub>), 24.19 (1 CH<sub>2</sub>), 30.28 (1 CH<sub>2</sub>), 32.77 (1 CH<sub>2</sub>), 33.10 (1 CH<sub>2</sub>), 33.23 (1 CH<sub>2</sub>), 55.48 (1 CH<sub>3</sub>), 114.35 (2 CH), 120.40 (2 CH), 129.40 (1 CH), 133.22 (1 quat. C), 142.76 (1 quat. C), 149.57 (1 quat. C), 153.75 (1 quat. C), 158.29 (1 quat. C); HRMS calcd. for C<sub>25</sub>H<sub>42</sub>O<sub>2</sub>Si [M+Na]<sup>+</sup>: 425.2954, found 425.2964.

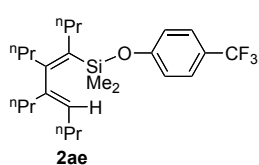

Colorless liquid, isolated yield 82% (361 mg); <sup>1</sup>H NMR (400 MHz, CDCl<sub>3</sub>, 25 °C): δ = 0.28 (s, 6H, CH<sub>3</sub>), 0.90-0.97 (m, 12H, CH<sub>3</sub>), 1.38-1.47 (m, 8H, CH<sub>2</sub>), 2.02-2.20 (m, 8H, CH<sub>2</sub>), 5.15 (t, *J* = 7.2 Hz, 1H, CH), 6.88 (d, *J* = 8.4 Hz, 2H, CH), 7.48 (d, *J* = 8.4 Hz, 2H, CH); <sup>13</sup>C NMR (100 MHz, CDCl<sub>3</sub>, 25 °C): δ = 0.57 (2 CH<sub>3</sub>), 14.12 (1 CH<sub>3</sub>), 14.18 (1 CH<sub>3</sub>), 14.63 (1 CH<sub>3</sub>),

15.00 (1 CH<sub>3</sub>), 21.72 (1 CH<sub>2</sub>), 22.23 (1 CH<sub>2</sub>), 22.66 (1 CH<sub>2</sub>), 24.22 (1 CH<sub>2</sub>), 30.32 (1 CH<sub>2</sub>), 32.84 (1 CH<sub>2</sub>), 33.04 (1 CH<sub>2</sub>), 33.29 (1 CH<sub>2</sub>), 119.87 (2 CH), 122.87 (q, *J* = 32 Hz, 1 quat. C), 124.61 (q, *J* = 269 Hz, 1 CF<sub>3</sub>), 126.72 (q, *J* = 3.7 Hz, 2 CH), 129.70 (1 CH), 132.63 (1 quat. C), 143.02 (1 quat. C), 158.82 (1 quat. C), 159.20 (1 quat. C); HRMS calcd. for C<sub>25</sub>H<sub>39</sub>F<sub>3</sub>OSi [M+Na]<sup>+</sup>: 463.2598, found 463.2590.

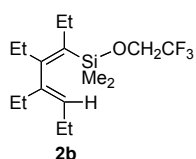

Colorless liquid, isolated yield 86% (277 mg); <sup>1</sup>H NMR (300 MHz, CDCl<sub>3</sub>, 25 °C): δ = 0.22 (s, 6H, CH<sub>3</sub>), 0.92-1.06 (m, 12H, CH<sub>3</sub>), 2.10-2.22 (m, 8H, CH<sub>2</sub>), 3.88 (q, *J* = 8.4 Hz, 2H, CH<sub>2</sub>), 5.14 (t, *J* = 7.2 Hz, 1H, CH); <sup>13</sup>C NMR (75 MHz, CDCl<sub>3</sub>, 25 °C): δ = 0.54 (2 CH<sub>3</sub>), 13.00 (1 CH<sub>3</sub>), 13.05 (1

CH<sub>3</sub>), 13.86 (1 CH<sub>3</sub>), 15.34 (1 CH<sub>3</sub>), 21.23 (1 CH<sub>2</sub>), 23.08 (1 CH<sub>2</sub>), 23.22 (1 CH<sub>2</sub>), 23.45 (1 CH<sub>2</sub>), 61.22 (q, *J* = 35 Hz, 1

CH<sub>2</sub>), 124.54 (q, *J* = 277 Hz, 1 CF<sub>3</sub>), 131.12 (1 CH), 133.55 (1 quat. C), 142.91 (1 quat. C), 159.76 (1 quat. C); HRMS calcd. for C<sub>16</sub>H<sub>29</sub>F<sub>3</sub>OSi [M+H]<sup>+</sup>: 323.2012, found 323.2013.

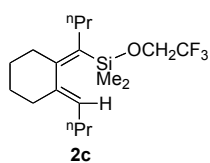

Colorless liquid, isolated yield 81% (283 mg); <sup>1</sup>H NMR (300 MHz, CDCl<sub>3</sub>, 25 °C): δ = 0.19 (s, 6H, CH<sub>3</sub>), 0.90 (t, *J* = 7.2 Hz, 3H, CH<sub>3</sub>), 0.93 (t, *J* = 7.2 Hz, 3H, CH<sub>3</sub>), 1.27-1.67 (m, 8H, CH<sub>2</sub>), 1.93-2.31 (m, 8H, CH<sub>2</sub>), 3.87 (q, *J* = 8.7 Hz, 2H, CH<sub>2</sub>), 5.19 (t, *J* = 7.2 Hz, 1H, CH); <sup>13</sup>C NMR (75 MHz, CDCl<sub>3</sub>, 25 °C): δ = 0.15 (2 CH<sub>3</sub>), 14.03 (1 CH<sub>3</sub>), 14.25 (1 CH<sub>3</sub>), 22.70 (1 CH<sub>2</sub>), 24.07 (1 CH<sub>2</sub>), 27.91 (1 CH<sub>2</sub>), 28.26 (1 CH<sub>2</sub>), 29.83 (1 CH<sub>2</sub>), 30.37 (1 CH<sub>2</sub>), 32.32 (1 CH<sub>2</sub>), 32.67 (1 CH<sub>2</sub>), 61.21 (q, *J* = 35 Hz, 1 CH<sub>2</sub>), 124.50 (q, *J* = 277 Hz, 1 CF<sub>3</sub>), 125.42 (1 CH), 129.29 (1 quat. C), 144.15 (1 quat. C), 158.36 (1 quat. C); HRMS calcd. for C<sub>18</sub>H<sub>31</sub>F<sub>3</sub>OSi [M+H]<sup>+</sup>: 349.2169, found 349.2164.

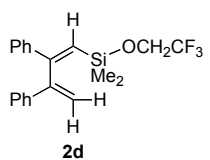

Colorless liquid, isolated yield 82% (296 mg); <sup>1</sup>H NMR (400 MHz, CDCl<sub>3</sub>, SiMe<sub>4</sub>, 25 °C): δ = 0.21 (s, 6H, CH<sub>3</sub>), 3.90 (q, *J* = 8.7 Hz, 2H, CH<sub>2</sub>), 5.35 (d, *J* = 1.4 Hz, 1H, CH<sub>2</sub>), 5.85 (d, *J* = 1.4 Hz, 1H, CH<sub>2</sub>), 6.27 (s, 1H, CH), 7.17-7.47 (m, 10H, CH); <sup>13</sup>C NMR (75 MHz, CDCl<sub>3</sub>, 25 °C): δ = -0.55 (2 CH<sub>3</sub>), 61.29 (q, *J* = 35 Hz, 1 CH<sub>2</sub>), 116.15 (1 CH<sub>2</sub>), 124.28 (q, *J* = 277 Hz, 1 CF<sub>3</sub>), 126.47 (1 CH), 126.62 (2 CH), 126.72 (2 CH), 127.87 (1 CH), 128.23 (1 CH), 128.28 (2 CH), 128.36 (2 CH), 138.31 (1 quat. C), 140.50 (1 quat. C), 148.45 (1 quat. C), 159.11 (1 quat. C); HRMS calcd. for C<sub>20</sub>H<sub>21</sub>F<sub>3</sub>OSi [M+H]<sup>+</sup>: 363.1386, found 363.1389.

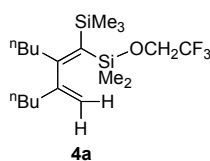

Colorless liquid, isolated yield 75% (296 mg); <sup>1</sup>H NMR (300 MHz, CDCl<sub>3</sub>, 25 °C): δ = 0.01 (s, 3H, CH<sub>3</sub>), 0.13 (s, 3H, CH<sub>3</sub>), 0.17 (s, 9H, CH<sub>3</sub>), 0.85-0.95 (m, 6H, CH<sub>3</sub>), 1.27-1.38 (m, 8H, CH<sub>2</sub>), 2.03-2.24 (m, 4H, CH<sub>2</sub>), 3.81 (q, *J* = 8.7 Hz, 2H, CH<sub>2</sub>), 4.75 (s, 2H, CH<sub>2</sub>); <sup>13</sup>C NMR (75 MHz, CDCl<sub>3</sub>, 25 °C): δ = -0.55 (1 CH<sub>3</sub>), -0.01 (1 CH<sub>3</sub>), 2.43 (3 CH<sub>3</sub>), 14.03 (2 CH<sub>3</sub>), 22.85 (1 CH<sub>2</sub>), 22.96 (1 CH<sub>2</sub>), 29.18 (1 CH<sub>2</sub>), 31.22 (1 CH<sub>2</sub>), 34.11 (1 CH<sub>2</sub>), 37.27 (1 CH<sub>2</sub>), 60.86 (q, *J* = 35 Hz, 1 CH<sub>2</sub>), 122.95 (1 CH<sub>2</sub>), 124.45 (q, *J* = 277 Hz, 1 CF<sub>3</sub>), 133.99 (1 quat. C), 155.26 (1 quat. C), 174.24 (1 quat. C); HRMS calcd. for C<sub>19</sub>H<sub>37</sub>F<sub>3</sub>OSi<sub>2</sub> [M+Na]<sup>+</sup>: 417.2366, found 417.2369.

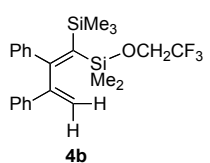

Colorless liquid, isolated yield 84% (365 mg); <sup>1</sup>H NMR (300 MHz, CDCl<sub>3</sub>, SiMe<sub>4</sub>, 25 °C): δ = -0.10 (s, 9H, CH<sub>3</sub>), 0.12 (s, 3H, CH<sub>3</sub>), 0.36 (s, 3H, CH<sub>3</sub>), 3.88 (q, *J* = 8.7 Hz, 2H, CH<sub>2</sub>), 5.34 (d, *J* = 1.8 Hz, 1H, CH<sub>2</sub>), 5.60 (d, *J* = 1.8 Hz, 1H, CH<sub>2</sub>), 7.01-7.33 (m, 10H, CH); <sup>13</sup>C NMR (75 MHz, CDCl<sub>3</sub>, 25 °C): δ = -0.41 (1 CH<sub>3</sub>), 2.06 (3 CH<sub>3</sub>), 2.56 (1 CH<sub>3</sub>), 61.00 (q, *J* = 35 Hz, 1 CH<sub>2</sub>), 115.83 (1 CH<sub>2</sub>), 124.44 (q, *J* = 277 Hz, 1 CF<sub>3</sub>), 127.61 (2 CH), 127.71 (1 CH), 127.79 (4 CH), 127.85 (1 CH), 128.01 (2 CH),

137.94 (1 quat. C), 143.82 (1 quat. C), 144.67 (1 quat. C), 154.41 (1 quat. C), 169.85 (1 quat. C); HRMS calcd. for  $C_{23}H_{29}F_3OSi_2$ : 434.1709, found 434.1711.

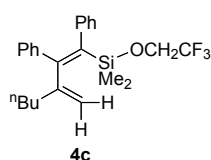

Colorless liquid, isolated yield 88% (365 mg); <sup>1</sup>H NMR (300 MHz, CDCl<sub>3</sub>, 25 °C): δ = 0.30 (s, 6H, CH<sub>3</sub>), 0.82 (t, *J* = 7.2 Hz, 3H, CH<sub>3</sub>), 1.19-1.41 (m, 4H, CH<sub>2</sub>), 1.97 (t, *J* = 7.8 Hz, 2H, CH<sub>2</sub>), 3.56 (q, *J* = 8.7 Hz, 2H, CH<sub>2</sub>), 5.10 (d, *J* = 2.1 Hz, 1H, CH<sub>2</sub>), 5.28 (d, *J* = 2.1 Hz, 1H, CH<sub>2</sub>), 6.91-7.11 (m, 10H, CH); <sup>13</sup>C NMR (75 MHz, CDCl<sub>3</sub>, 25 °C): δ = 0.14 (2 CH<sub>3</sub>), 13.94 (1 CH<sub>3</sub>),

22.54 (1 CH<sub>2</sub>), 29.23 (1 CH<sub>2</sub>), 34.59 (1 CH<sub>2</sub>), 61.27 (q, *J* = 35 Hz, 1 CH<sub>2</sub>), 113.64 (1 CH<sub>2</sub>), 124.18 (q, *J* = 277 Hz, 1 CF<sub>3</sub>), 125.26 (1 CH), 126.48 (1 CH), 127.23 (2 CH), 127.46 (2 CH), 129.14 (2 CH), 129.80 (2 CH), 138.92 (1 quat. C), 140.09 (1 quat. C), 142.04 (1 quat. C), 151.92 (1 quat. C), 158.17 (1 quat. C); HRMS calcd. for  $C_{24}H_{29}F_3OSi$  [M+H]<sup>+</sup>: 419.2013, found 419.2005.

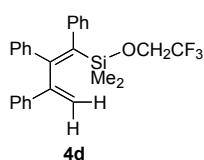

Colorless liquid, isolated yield 75% (328 mg); <sup>1</sup>H NMR (400 MHz, CDCl<sub>3</sub>, SiMe<sub>4</sub>, 25 °C): δ = 0.23 (s, 6H, CH<sub>3</sub>), 3.52 (q, *J* = 8.7 Hz, 2H, CH<sub>2</sub>), 5.51 (d, *J* = 1.1 Hz, 1H, CH<sub>2</sub>), 5.82 (d, *J* = 1.1 Hz, 1H, CH<sub>2</sub>), 6.89-7.52 (m, 15H, CH); <sup>13</sup>C NMR (75 MHz, CDCl<sub>3</sub>, SiMe<sub>4</sub>, 25 °C): δ = 0.05 (2 CH<sub>3</sub>), 61.29 (q, *J* = 35 Hz, 1 CH<sub>2</sub>), 115.68 (1 CH<sub>2</sub>), 124.17 (q, *J* = 277 Hz, 1 CF<sub>3</sub>), 125.58 (1 CH), 126.62

(1 CH), 127.01 (2 CH), 127.23 (2 CH), 127.70 (2 CH), 127.92 (1 CH), 128.28 (2 CH), 129.48 (2 CH), 129.81 (2 CH), 138.08 (1 quat. C), 139.84 (1 quat. C), 142.09 (1 quat. C), 142.76 (1 quat. C), 149.90 (1 quat. C), 154.50 (1 quat. C); HRMS calcd. for  $C_{26}H_{25}F_3OSi$  [M+H]<sup>+</sup>: 439.1699, found 439.1705.

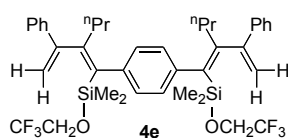

Colorless liquid, isolated yield 65% (475 mg); <sup>1</sup>H NMR (300 MHz, CDCl<sub>3</sub>, 25 °C): δ = 0.19 (s, 12H, CH<sub>3</sub>), 0.63 (t, *J* = 7.2 Hz, 6H, CH<sub>3</sub>), 1.20-1.26 (m, 4H, CH<sub>2</sub>), 1.94 (t, *J* = 7.8 Hz, 4H, CH<sub>2</sub>), 3.55 (q, *J* = 8.4 Hz, 4H, CH<sub>2</sub>), 5.30 (d, *J* = 1.8 Hz, 2H, CH<sub>2</sub>), 5.66 (d, *J* = 1.8 Hz, 2H, CH<sub>2</sub>), 7.15-7.57 (m, 14H, CH); <sup>13</sup>C NMR (75 MHz, CDCl<sub>3</sub>, 25 °C): δ = -0.18 (4 CH<sub>3</sub>), 13.67 (2 CH<sub>3</sub>), 21.45 (2 CH<sub>2</sub>), 35.04 (2 CH<sub>2</sub>), 61.26 (q, *J* = 35 Hz, 2 CH<sub>2</sub>), 114.42 (2 CH<sub>2</sub>), 124.12 (q, *J* = 277 Hz, 2 CF<sub>3</sub>), 126.85 (4 CH), 127.98 (2 CH), 128.43 (8 CH), 138.47 (2 quat. C), 140.26 (2 quat. C), 140.98 (2 quat. C), 149.68 (2 quat. C), 156.09 (2 quat. C); HRMS calcd. for  $C_{40}H_{48}F_6O_2Si_2$  [M+Na]<sup>+</sup>: 753.2989, found 753.2988.

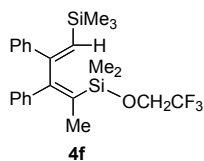

Colorless liquid, isolated yield 68% (305 mg); <sup>1</sup>H NMR (300 MHz, CDCl<sub>3</sub>, SiMe<sub>4</sub>, 25 °C): δ = 0.06 (s, 9H, CH<sub>3</sub>), 0.09 (s, 3H, CH<sub>3</sub>), 0.19 (s, 3H, CH<sub>3</sub>), 2.02 (s, 3H, CH<sub>3</sub>), 3.79 (q, *J* = 8.4 Hz, 2H, CH<sub>2</sub>), 6.32 (s, 1H, CH), 7.16-7.51 (m, 10H, CH); <sup>13</sup>C NMR (75 MHz, CDCl<sub>3</sub>, SiMe<sub>4</sub>, 25 °C): δ =

-1.10 (1 CH<sub>3</sub>), -0.52 (1 CH<sub>3</sub>), -0.27 (3 CH<sub>3</sub>), 19.31 (1 CH<sub>3</sub>), 61.28 (q, *J* = 35 Hz, 1 CH<sub>2</sub>), 124.26 (q, *J* = 276 Hz, 1 CF<sub>3</sub>),

126.95 (2 CH), 127.13 (1 CH), 127.63 (1 CH), 127.70 (2 CH), 128.15 (2 CH), 129.92 (2 CH), 129.96 (1 CH), 134.45 (1 quat. C), 140.48 (1 quat. C), 141.66 (1 quat. C), 151.20 (1 quat. C), 156.22 (1 quat. C); HRMS calcd. for  $C_{24}H_{31}F_3OSi_2$   $[M+Na]^+$ : 471.1758, found 471.1759.

## Reference

1. Yamaguchi, S.; Endo, T.; Uchida, M.; Izumizawa, T.; Furukawa, K.; Tamao, K. *Chem. Eur. J.* **2000**, *6*, 1683.
2. (a) van Klink, G. P. M.; de Boer, H. J. R.; Schat, G.; Akkerman, O. S.; Bickelhaupt, F.; Spek, A. L.; *Organometallics* **2002**, *21*, 2119. (b) Leroux, F. R.; Bonnafoux, L.; Heiss, C.; Colobert, F.; Lanfranchi, D. A. *Adv. Synth. Catal.* **2007**, *349*, 2705. (c) Nagaki, A.; Takabayashi, N.; Tomida, Y.; Yoshida, J. *Org. Lett.* **2008**, *10*, 3937.
3. Wang, C.; Luo, Q.; Sun, H.; Guo, X.; Xi, Z. *J. Am. Chem. Soc.* **2007**, *129*, 3094.
4. Yu, N.; Wang, C.; Zhao, F.; Liu, L.; Zhang, W. -X.; Xi, Z. *Chem. Eur. J.* **2008**, *14*, 5670.
5. Luo, Q.; Gu, L.; Wang, C.; Liu, J.; Zhang, W. -X.; Xi, Z. *Tetrahedron Lett.* **2009**, *50*, 3213.

## 2. Calculation Section

### 2-1. Full/Detailed Citation

**Gaussian 03:** Frisch, M. J.; Trucks, G. W.; Schlegel, H. B.; Scuseria, G. E.; Robb, M. A.; Cheeseman, J. R.; Montgomery Jr., J. A.; Vreven, T.; Kudin, K. N.; Burant, J. C.; Millam, J. M.; Iyengar, S. S.; Tomasi, J.; Barone, V.; Mennucci, B.; Cossi, M.; Scalmani, G.; Rega, N.; Petersson, G. A.; Nakatsuji, H.; Hada, M.; Ehara, M.; Toyota, K.; Fukuda, R.; Hasegawa, J.; Ishida, M.; Nakajima, T.; Honda, Y.; Kitao, O.; Nakai, H.; Klene, M.; Li, X.; Knox, J. E.; Hratchian, H. P.; Cross, J. B.; Bakken, V.; Adamo, C.; Jaramillo, J.; Gomperts, R.; Stratmann, R. E.; Yazyev, O.; Austin, A. J.; Cammi, R.; Pomelli, C.; Ochterski, J. W.; Ayala, P. Y.; Morokuma, K.; Voth, G. A.; Salvador, P.; Dannenberg, J. J.; Zakrzewski, V. G.; Dapprich, S.; Daniels, A. D.; Strain, M. C.; Farkas, O.; Malick, D. K.; Rabuck, A. D.; Raghavachari, K.; Foresman, J. B.; Ortiz, J. V.; Cui, Q.; Baboul, A. G.; Clifford, S.; Cioslowski, J.; Stefanov, B. B.; Liu, G.; Liashenko, A.; Piskorz, P.; Komaromi, I.; Martin, R. L.; Fox, D. J.; Keith, T.; Al-Laham, M. A.; Peng, C. Y.; Nanayakkara, A.; Challacombe, A. M.; Gill, P. M. W.; Johnson, B.; Chen, W.; Wong, M. W.; Gonzalez, C.; Pople, J. A. *Gaussian 03, Revision E.01*, Gaussian, Inc., Wallingford, CT, 2004.

**GRRM:** (a) Ohno, K.; Maeda, S. *Chem. Phys. Lett.* **2004**, *384*, 277. (b) Maeda, S.; Ohno, K. *J. Phys. Chem. A* **2005**, *109*, 5742. (c) Yang, X.; Maeda, S.; Ohno, K. *J. Phys. Chem. A* **2005**, *109*, 7319. (d) Ohno, K.; Maeda, S. *J. Phys. Chem. A* **2006**, *110*, 8933. (e) Yang, X.; Maeda, S.; Ohno, K. *Chem. Phys. Lett.* **2006**, *418*, 208. (f) Maeda, S.; Ohno, K. *J. Phys. Chem. A* **2007**, *111*, 4527. (g) Yang, X.; Maeda, S.; Ohno, K. *J. Phys. Chem. A* **2007**, *111*, 5099. (h) Watanabe, Y.; Maeda, S.; Ohno, K. *Chem. Phys. Lett.* **2007**, *447*, 21.

**B3LYP Theory:** (a) Becke, A. D. *Phys. Rev.* **1988**, *A38*, 3098. (b) Becke, A. D. *J. Chem. Phys.* **1993**, *98*, 1372. (c) Becke, A. D. *J. Chem. Phys.* **1993**, *98*, 5648. (d) Lee, C.; Yang, W.; Parr, R. G. *Phys. Rev.* **1988**, *B37*, 785.

**6-31+G\* basic set:** (a) Hariharan, P. C.; Pople, J. A. *Theoret. Chim. Acta* **1973**, *28*, 213. (b) Francel, M.M.; Petro, W.J.; Hehre, W.J.; Binkley, J. S.; Gordon, M.S.; DeFrees D.J.; Pople, J. A. *J. Chem. Phys.* **1982**, *77*, 3654-3665. (c) Clark, T.; Chandrasekhar, J.; Schleyer, P.v.R.; *J. Comp. Chem.* **1983**, *4*, 294. (d) Krishnam, R.; Binkley, J.S.; Seeger, R.; Pople, J.A. *J. Chem. Phys.* **1980**, *72*, 650-654. (e) Gill, P.M.W.; Johnson, B. G.; Pople P.M.W.; Frisch, M. J.; *Chem. Phys. Lett.* **1992**, *197*, 499.

**STO-3G basic set:** (a) Hehre, W. J.; Stewart, R. F.; Pople, J. A. *J. Chem. Phys.* **1969**, 2657. (b) Hehre, W. J.; Ditchfield, R.; Stewart, R. F.; Pople, J. A. *J. Chem. Phys.* **1970**, 2769. (c) Pietro, W. J.; Levy, B. A.; Hehre, W. J.; Stewart, R. F. *J. Am. Chem. Soc.* **1980**, *102*, 2225. (d) Pietro, W. J.; Hehre, W. J. *J. Comp. Chem.* **1983**, *4*, 241.

**NBO analysis:** (a) Glendening, E. D.; Badenhoop, J. K.; Reed, A. E.; Carpenter, J. E.; Bohmann, J. A.; Morales, C. M.; Weinhold, F. *NBO 5.G*. Theoretical Chemistry Institute, University of Wisconsin, Madison, WI, 2004; <http://www.chem.wisc.edu/~nbo5>. (b) Reed, A. E.; Weinstock, R. B.; Weinhold, F. *J. Chem. Phys.* **1985**, *83*, 735. (c) Reed, A. E.; Curtiss, L. A.; Weinhold, F. *Chem. Rev.* **1988**, *88*, 899.

### 2-2 General Methods

All calculations were carried out with the Gaussian 03 programs. The global reaction route mapping method (GRRM) based on Gaussian 03 was utilized for locating all local equilibrium structures. Geometry optimization were carried out by using the method of the Becke three-parameter hybrid functional combined with Lee–Yang–Parr correlation functional (B3LYP/6-31+G\*). All stationary points were optimized without any symmetry assumptions, and characterized by normal coordinate analysis at the same level of theory. The method of (B3LYP/STO-3G) is utilized for the orbital analysis and the natural charges calculation (by natural population analysis with the NBO 3.1 program package). Second-order perturbation theory analysis of fock matrix was also performed with NBO 5.G program package at the same level as used for geometry optimization.

### 2-3. Geometry optimization (Cartesian coordinates and total electron energies)

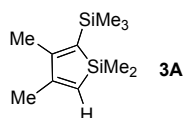

|        |                           |                 |                 |
|--------|---------------------------|-----------------|-----------------|
| C      | -0.703747830834           | -2.090769395424 | 0.008168940840  |
| C      | 0.649416455276            | -1.951270759840 | 0.144904581462  |
| C      | 1.214021775424            | -0.548726195807 | 0.080526228023  |
| C      | 0.306183032623            | 0.437223449330  | -0.108413506421 |
| H      | 0.613501137798            | 1.479191198904  | -0.168249621369 |
| Si     | -1.391903603607           | -0.341797321555 | -0.226062710437 |
| Si     | -1.671507141108           | -3.704451377741 | 0.053430276758  |
| C      | -2.556492587276           | 0.229731408654  | 1.158107030143  |
| H      | -2.755616753012           | 1.306018112033  | 1.073829846319  |
| H      | -3.521923157737           | -0.288761161759 | 1.115357897803  |
| H      | -2.116093620496           | 0.047056704102  | 2.145448206187  |
| C      | -2.216601736401           | -0.046652505777 | -1.908873513771 |
| H      | -3.178105378242           | -0.568406703165 | -1.986913166309 |
| H      | -2.408447170507           | 1.023488368964  | -2.061045633412 |
| H      | -1.575272103784           | -0.391722018219 | -2.728493507343 |
| C      | -1.476923973694           | -4.590477757639 | 1.725019857429  |
| H      | -1.810622214534           | -3.946487763095 | 2.548754835696  |
| H      | -2.084733261574           | -5.505046878137 | 1.751251512691  |
| H      | -0.439311096413           | -4.877039942517 | 1.933612788939  |
| C      | -3.522353626870           | -3.346666455636 | -0.178762040857 |
| H      | -3.923788921134           | -2.707602878884 | 0.617607415692  |
| H      | -3.731878089433           | -2.858258281379 | -1.138620603310 |
| H      | -4.091609360892           | -4.285417921269 | -0.160597304660 |
| C      | -1.148522853246           | -4.878211311446 | -1.348822798816 |
| H      | -0.093829416935           | -5.170977935461 | -1.284732307287 |
| H      | -1.749497307375           | -5.797363729100 | -1.326598748943 |
| H      | -1.298608030347           | -4.407472749423 | -2.328888141832 |
| C      | 1.636145373989            | -3.078904903119 | 0.355566051339  |
| H      | 1.149667044026            | -4.054925936955 | 0.391123769395  |
| H      | 2.383518292592            | -3.107599308577 | -0.449019695339 |
| H      | 2.193117562641            | -2.949493836848 | 1.293555307730  |
| C      | 2.699478659561            | -0.317661029569 | 0.224125838912  |
| H      | 3.076652051138            | -0.680396854655 | 1.189791512469  |
| H      | 3.270547833288            | -0.841969624137 | -0.553860232558 |
| H      | 2.933679137066            | 0.748976135154  | 0.151521294847  |
| ENERGY | = -1011.462875461633 a.u. |                 |                 |

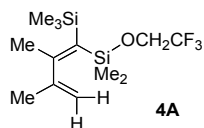

|    |                 |                 |                 |
|----|-----------------|-----------------|-----------------|
| C  | -0.804936875866 | -1.965891508778 | -0.032225526764 |
| C  | 0.508028664951  | -1.887606979028 | 0.323761934917  |
| C  | 1.247570944551  | -0.606350939541 | 0.612461927808  |
| Si | -1.829444379890 | -0.410493876748 | -0.392489667515 |
| Si | -1.662193622638 | -3.679709127969 | -0.135821414860 |
| C  | -2.853679721574 | 0.108111550576  | 1.111556320219  |
| H  | -3.460632514480 | 0.998191925021  | 0.903524400040  |
| H  | -3.542286169087 | -0.698667063849 | 1.392083852150  |
| H  | -2.226596541145 | 0.313377972851  | 1.987622047790  |
| C  | -2.932724643443 | -0.617812783115 | -1.909856094783 |
| H  | -3.855797017826 | -1.168042415412 | -1.705219763905 |
| H  | -3.210239665605 | 0.382016135056  | -2.265184614337 |
| H  | -2.407589211725 | -1.122900417205 | -2.729933687289 |
| C  | -1.408233938680 | -4.657591710931 | 1.477133171963  |
| H  | -1.817381085261 | -4.098126773547 | 2.328840511913  |
| H  | -1.955796835759 | -5.607973131423 | 1.418849008917  |
| H  | -0.364614837209 | -4.891297239651 | 1.708139679216  |
| C  | -3.553478383486 | -3.562865887180 | -0.307364710259 |



|        |                           |                 |                 |
|--------|---------------------------|-----------------|-----------------|
| H      | -4.019537608482           | -2.860376791876 | 0.393896964641  |
| H      | -3.876600660219           | -3.297953243540 | -1.318916448731 |
| H      | -3.967251423765           | -4.555957133494 | -0.085907420291 |
| C      | -1.066833218747           | -4.681641212456 | -1.638015509342 |
| H      | 0.001231532498            | -4.924690575206 | -1.609756081294 |
| H      | -1.620801069604           | -5.627837072506 | -1.702969538075 |
| H      | -1.251712900339           | -4.127433769289 | -2.567117587901 |
| C      | 1.433973803908            | -3.078934724012 | 0.528267926428  |
| H      | 1.044630545153            | -4.011229046353 | 0.119041059234  |
| H      | 2.407327947239            | -2.893222325919 | 0.058563559284  |
| H      | 1.630932418585            | -3.224000221575 | 1.599126303158  |
| C      | 2.189986955296            | -0.094920931246 | -0.454330385844 |
| H      | 2.910560220146            | -0.864055565673 | -0.759965657355 |
| H      | 1.626174614783            | 0.193847728918  | -1.349241464690 |
| H      | 2.757473389315            | 0.772528364624  | -0.099725324284 |
| C      | 1.137567918779            | -0.019233815739 | 1.813852579987  |
| H      | 1.722384826737            | 0.861997049553  | 2.071702799701  |
| H      | 0.472818780049            | -0.408576279096 | 2.581684674981  |
| O      | -0.814455891846           | 0.870106206091  | -0.852377964443 |
| C      | -0.615057405477           | 2.105268459580  | -0.239079770101 |
| H      | 0.455688203477            | 2.340905500373  | -0.211134098438 |
| H      | -1.000720968757           | 2.150687467185  | 0.786839917449  |
| C      | -1.297585672239           | 3.221831985217  | -1.024690706879 |
| F      | -0.835082024506           | 3.327229880437  | -2.289160482062 |
| F      | -2.640787796554           | 3.046060269775  | -1.102076431177 |
| F      | -1.082704951211           | 4.416720227133  | -0.412935129189 |
| ENERGY | = -1464.274660724293 a.u. |                 |                 |

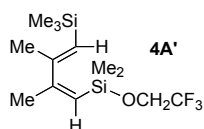

|    |                 |                 |                 |
|----|-----------------|-----------------|-----------------|
| C  | -0.688981459799 | -1.753542504652 | -0.110742776549 |
| C  | 0.621880806594  | -1.776668145409 | 0.207893427741  |
| C  | 1.437817983603  | -0.536495766099 | 0.458094128896  |
| Si | -1.829406786123 | -0.293308469160 | -0.388006311986 |
| C  | -2.532085718149 | 0.393981215997  | 1.225258333609  |
| H  | -3.235040011525 | 1.218026208447  | 1.049936728877  |
| H  | -3.083119899145 | -0.402430292653 | 1.742790471150  |
| H  | -1.750240040800 | 0.742007220532  | 1.909914151539  |
| C  | -3.223394206664 | -0.851088257788 | -1.522813335717 |
| H  | -3.780143130710 | -1.692573485366 | -1.089514160638 |
| H  | -3.932362443460 | -0.034011774560 | -1.702119575351 |
| H  | -2.831755771673 | -1.173987390086 | -2.495249642097 |
| C  | 1.395914720911  | -3.074250967944 | 0.336729350990  |
| H  | 0.763041306503  | -3.941043169485 | 0.120315915018  |
| H  | 2.254278659129  | -3.099762547976 | -0.347702262887 |
| H  | 1.801609486797  | -3.180832147307 | 1.351826073374  |
| C  | 2.310507335137  | -0.118592298584 | -0.704955452565 |
| H  | 2.957384549448  | -0.944596539154 | -1.028799603642 |
| H  | 1.681005474386  | 0.144495588430  | -1.564900332808 |
| H  | 2.948284248696  | 0.733259945545  | -0.463598088241 |
| C  | 1.387107690315  | 0.074399869687  | 1.661969570294  |
| O  | -0.971710259558 | 0.915777503349  | -1.211847728833 |
| C  | -0.756238322269 | 2.243572903087  | -0.845065659754 |
| H  | 0.275376288197  | 2.529341191930  | -1.084163018523 |
| H  | -0.926235736972 | 2.430700515561  | 0.222641275456  |
| C  | -1.670559054614 | 3.187953019740  | -1.621475321207 |
| F  | -1.490182261818 | 3.103510461549  | -2.956376668080 |
| F  | -2.982513158797 | 2.943504519883  | -1.377210728795 |
| F  | -1.425925181838 | 4.474591842777  | -1.257480191113 |
| H  | 0.696951812835  | -0.393573727079 | 2.374562937730  |
| Si | 2.312126021873  | 1.517269765446  | 2.453434000288  |
| C  | 3.562988128440  | 0.803791877286  | 3.689530912486  |
| H  | 4.065710580867  | 1.604947436641  | 4.247330823934  |
| H  | 3.074257154295  | 0.146419409680  | 4.419892835005  |
| H  | 4.33533861905   | 0.214122465828  | 3.179794050465  |
| C  | 3.229418683147  | 2.680201130190  | 1.266479469228  |

|        |                           |                 |                 |
|--------|---------------------------|-----------------|-----------------|
| H      | 3.589824440336            | 3.552025019494  | 1.829167509242  |
| H      | 4.106584452650            | 2.208484939986  | 0.807866079753  |
| H      | 2.587401323441            | 3.056484516374  | 0.460718972049  |
| C      | 1.029673956531            | 2.534237732752  | 3.415790220910  |
| H      | 0.299140147010            | 3.011942835726  | 2.750385544826  |
| H      | 0.472038244996            | 1.910263953343  | 4.126221872735  |
| H      | 1.517726442047            | 3.330850213166  | 3.992589859064  |
| H      | -1.155694916206           | -2.733146739143 | -0.259670055877 |
| ENERGY | = -1464.285046319848 a.u. |                 |                 |

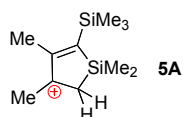

|        |                           |                 |                 |
|--------|---------------------------|-----------------|-----------------|
| C      | -0.685723749476           | -2.110774905580 | -0.105363880431 |
| C      | 0.686134890412            | -1.995809464674 | 0.100603719695  |
| C      | 1.189486036107            | -0.645900064469 | 0.049750467836  |
| C      | 0.387096376612            | 0.327333229135  | -0.678804817032 |
| H      | 0.448094192223            | 0.149159401071  | -1.762724676972 |
| Si     | -1.414890697376           | -0.362743567160 | -0.326910764198 |
| Si     | -1.689957007767           | -3.759940333251 | -0.060732921435 |
| C      | -2.056599606894           | 0.349460200891  | 1.295108077925  |
| H      | -2.281454678039           | 1.415753752255  | 1.173268178306  |
| H      | -2.984997053404           | -0.150439435676 | 1.595142739876  |
| H      | -1.334665233894           | 0.241891004254  | 2.111839506136  |
| C      | -2.583312381315           | -0.102460135634 | -1.768933501074 |
| H      | -3.598251729834           | -0.438786718657 | -1.529438694260 |
| H      | -2.647479549249           | 0.966246364690  | -2.011582076778 |
| H      | -2.255854384644           | -0.628711344388 | -2.673117131720 |
| C      | -1.433036382363           | -4.571615010109 | 1.627863798996  |
| H      | -1.738813995948           | -3.909989508153 | 2.447174784030  |
| H      | -2.059516839740           | -5.471127339038 | 1.686307391822  |
| H      | -0.399052256648           | -4.881509566650 | 1.810174866863  |
| C      | -3.517106058856           | -3.349154313861 | -0.291950488711 |
| H      | -3.901730869152           | -2.660383481224 | 0.470680847336  |
| H      | -3.731181942746           | -2.924349554503 | -1.279365013403 |
| H      | -4.106022014626           | -4.271447693018 | -0.208429206731 |
| C      | -1.096408260401           | -4.847506335799 | -1.490107942971 |
| H      | -0.050900345215           | -5.160503086784 | -1.397413609619 |
| H      | -1.708629273471           | -5.758082233499 | -1.523271316450 |
| H      | -1.211907248913           | -4.343644507829 | -2.457182537992 |
| C      | 1.630605763944            | -3.119904049153 | 0.472465805256  |
| H      | 1.231499968010            | -4.088321411959 | 0.170377330609  |
| H      | 2.609518441710            | -3.000305395701 | -0.003496730732 |
| H      | 1.794526107903            | -3.156145784852 | 1.557303736532  |
| C      | 2.445324083633            | -0.243390956535 | 0.734269299206  |
| H      | 2.722574509531            | -0.897240638598 | 1.564365862140  |
| H      | 3.261862590539            | -0.289805657388 | -0.008036010661 |
| H      | 2.401166897840            | 0.798952768278  | 1.065814320783  |
| H      | 0.629432121516            | 1.371084633575  | -0.471287952186 |
| ENERGY | = -1011.825419683084 a.u. |                 |                 |

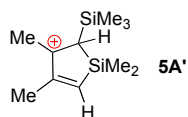

|    |                 |                 |                 |
|----|-----------------|-----------------|-----------------|
| C  | -0.892589988960 | -2.090671481761 | 0.093116084905  |
| C  | 0.531311382227  | -1.983050905720 | 0.021288464779  |
| C  | 1.130525164640  | -0.701322056689 | 0.391916189025  |
| C  | 0.236166754642  | 0.333297252580  | 0.351187554242  |
| H  | 0.567445483262  | 1.346744131774  | 0.573541958034  |
| Si | -1.480285898766 | -0.250854652428 | -0.165178484503 |
| C  | -2.889106805182 | 0.481033674569  | 0.835773502951  |
| H  | -2.926498591725 | 1.561593804503  | 0.644255118516  |
| H  | -3.855584133311 | 0.069574677039  | 0.522525216552  |

|        |                           |                 |                 |
|--------|---------------------------|-----------------|-----------------|
| H      | -2.790025884540           | 0.343553174371  | 1.916359111886  |
| C      | -1.773236213750           | -0.021482044813 | -2.015153742595 |
| H      | -2.687310210865           | -0.540803630068 | -2.326991277965 |
| H      | -1.901693120981           | 1.042480752478  | -2.247321775644 |
| H      | -0.940436800930           | -0.402116878171 | -2.615900145906 |
| C      | 1.402400268677            | -3.092321544563 | -0.464735154375 |
| H      | 0.843476476672            | -3.999684942765 | -0.696839764783 |
| H      | 1.946063793838            | -2.768164140817 | -1.364407408591 |
| H      | 2.178155545932            | -3.324040062191 | 0.277949313150  |
| C      | 2.606707791071            | -0.568281071760 | 0.671446932045  |
| H      | 2.925228442965            | -1.224687864368 | 1.490585962905  |
| H      | 3.207422023299            | -0.833939396078 | -0.207501081357 |
| H      | 2.856387282715            | 0.459310898589  | 0.946665136377  |
| H      | -1.279614643196           | -2.864732517619 | -0.581944681610 |
| Si     | -1.461402915793           | -2.882953513423 | 1.868018442566  |
| C      | -0.842408736786           | -1.801693330212 | 3.277094114698  |
| H      | -1.263474043295           | -2.179587707815 | 4.218308314574  |
| H      | 0.248786380503            | -1.838067864791 | 3.375548505133  |
| H      | -1.136651066559           | -0.750351351577 | 3.193863268743  |
| C      | -0.699156169910           | -4.602443202857 | 1.950385287269  |
| H      | -1.061559146534           | -5.105191193162 | 2.856920227073  |
| H      | -0.989985590729           | -5.229661628670 | 1.099204759794  |
| H      | 0.394919365465            | -4.587630486973 | 2.008743386636  |
| C      | -3.335841464248           | -3.009258843844 | 1.772755025818  |
| H      | -3.839351299721           | -2.039010170016 | 1.814993450712  |
| H      | -3.664622316484           | -3.529505532038 | 0.865125983092  |
| H      | -3.689830303497           | -3.599139840738 | 2.628600755887  |
| ENERGY | = -1011.835772157685 a.u. |                 |                 |

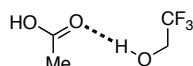

CP1

|        |                          |                 |                 |
|--------|--------------------------|-----------------|-----------------|
| C      | -0.183077419487          | -2.131378176806 | 0.198896310535  |
| O      | -0.140801037957          | -3.313495088145 | 0.472576622481  |
| H      | -1.286855158683          | -4.530607448151 | -0.278286466641 |
| O      | -1.923947516052          | -5.113581619045 | -0.744163085821 |
| C      | -1.246432048361          | -5.882625524270 | -1.700114700120 |
| H      | -1.848442316012          | -6.769865952993 | -1.919893929840 |
| H      | -0.253074824583          | -6.207893686122 | -1.362893875286 |
| C      | -1.054336252226          | -5.132009515275 | -3.016249709663 |
| F      | -0.330627802136          | -3.990908226908 | -2.849931600155 |
| F      | -0.385008802422          | -5.901713461025 | -3.912555853507 |
| F      | -2.225363009485          | -4.772564078541 | -3.587428611553 |
| O      | 0.775282216367           | -1.316337890330 | 0.700663372341  |
| H      | 0.641684337499           | -0.397632049004 | 0.412012980648  |
| C      | -1.233542978156          | -1.479963079639 | -0.674468091850 |
| H      | -0.770239129779          | -1.068121749125 | -1.579367150378 |
| H      | -1.980688139532          | -2.217472123572 | -0.969882196611 |
| H      | -1.727058859034          | -0.659760581040 | -0.138871634579 |
| ENERGY | = -681.880803841881 a.u. |                 |                 |

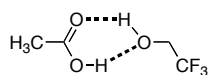

CP2

|   |                 |                 |                 |
|---|-----------------|-----------------|-----------------|
| C | 0.321708032153  | -0.320492933091 | 0.091318179657  |
| O | 1.339868524962  | -0.982673951754 | -0.074525859742 |
| O | 0.336263769076  | 0.992472696194  | 0.366311335100  |
| H | 1.273127315629  | 1.303267567878  | 0.419077489560  |
| C | -1.074266098439 | -0.878401961118 | 0.014144389606  |
| H | -1.573754591710 | -0.756151550613 | 0.981697321659  |
| H | -1.658622550468 | -0.322777139347 | -0.726957145313 |
| H | -1.036196122627 | -1.935137027483 | -0.252623991834 |
| H | 2.859014603032  | 0.092356266615  | 0.136446281333  |
| O | 3.122202537487  | 1.037134042833  | 0.233705218029  |
| C | 4.288061929179  | 1.192203378866  | 1.008035619465  |

|        |                          |                 |                |
|--------|--------------------------|-----------------|----------------|
| H      | 4.657928536448           | 2.209281179935  | 0.854755050774 |
| H      | 5.072661142463           | 0.482252484691  | 0.719408662561 |
| C      | 4.021461985508           | 1.012027460872  | 2.499828861216 |
| F      | 3.102030521192           | 1.888110252955  | 2.963591271313 |
| F      | 3.567313527578           | -0.233132151086 | 2.781152451002 |
| F      | 5.162751408519           | 1.201643763651  | 3.206969255616 |
| ENERGY | = -681.893879811408 a.u. |                 |                |

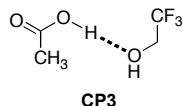

|        |                          |                 |                 |
|--------|--------------------------|-----------------|-----------------|
| C      | -0.506213679397          | -2.455778588313 | -0.022765332167 |
| O      | -0.443655808961          | -3.642691464182 | -0.244095720220 |
| O      | 0.558285396000           | -1.804877913078 | 0.512534175391  |
| H      | 0.390273778754           | -0.844903703854 | 0.621708931338  |
| C      | -1.733703428311          | -1.601513882012 | -0.291526137488 |
| H      | -2.154737505571          | -1.237602736602 | 0.654205953274  |
| H      | -1.482527732249          | -0.726441746920 | -0.902141557202 |
| H      | -2.485725863431          | -2.201933801466 | -0.805551316103 |
| O      | 0.614272081241           | 1.001280956720  | 0.718142531893  |
| H      | 0.280320344894           | 1.540930969330  | 1.453604600257  |
| C      | 1.901212660398           | 1.456663371065  | 0.330767472916  |
| H      | 2.593941277713           | 1.507247009269  | 1.178854318809  |
| H      | 2.285524946605           | 0.746230608071  | -0.403759931195 |
| C      | 1.827655013314           | 2.838022732190  | -0.310522381623 |
| F      | 1.095811733401           | 2.846135027206  | -1.441179098796 |
| F      | 1.262431902228           | 3.732711615911  | 0.544400587196  |
| F      | 3.067715083372           | 3.283112016651  | -0.610786186289 |
| ENERGY | = -681.878607877469 a.u. |                 |                 |

## 2-4. HOMO orbital and NPA analysis for silole molecule

The result for the molecular orbital coefficients of HOMO (No. 58) of silole **3A** was showed below. According to the data, the double bond of C=C(TMS) contributed a little more than that of C=C(H), probably due to the donating effect from TMS group. Natural population analysis (NPA) showed the same trend, in which the C1 is bearing more negative charge. These results indicate the region-selectivity should have preferred the C=C(TMS) part kinetically if considering the classic reaction pathway. Yet, the mismatch between theoretical conclusions and experimental data imply that a new mechanism may be involved in this reaction.

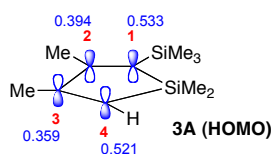

| EIGENVALUES -- |   |   |     | 58       |    |         |          |
|----------------|---|---|-----|----------|----|---------|----------|
|                |   |   |     | (A) --O  |    |         |          |
| 1              | 1 | C | 1S  | -0.00013 | 14 | 2PY     | -0.00033 |
| 2              |   |   | 2S  | 0.00056  | 15 | 2PZ     | -0.35868 |
| 3              |   |   | 2PX | 0.00044  | 16 | 4 C 1S  | -0.00006 |
| 4              |   |   | 2PY | -0.00014 | 17 | 2S      | 0.00028  |
| 5              |   |   | 2PZ | 0.53312  | 18 | 2PX     | 0.00136  |
| 6              | 2 | C | 1S  | 0.00003  | 19 | 2PY     | -0.00017 |
| 7              |   |   | 2S  | -0.00011 | 20 | 2PZ     | -0.52105 |
| 8              |   |   | 2PX | -0.00082 | 21 | 5 H 1S  | -0.00014 |
| 9              |   |   | 2PY | 0.00021  | 22 | 6 Si 1S | -0.00002 |
| 10             |   |   | 2PZ | 0.39412  | 23 | 2S      | 0.00007  |
| 11             | 3 | C | 1S  | -0.00004 | 24 | 2PX     | 0.00013  |
| 12             |   |   | 2S  | 0.00019  | 25 | 2PY     | -0.00014 |
| 13             |   |   | 2PX | 0.00107  | 26 | 2PZ     | -0.00070 |
|                |   |   |     |          | 27 | 3S      | -0.00022 |
|                |   |   |     |          | 28 | 3PX     | -0.00032 |
|                |   |   |     |          | 29 | 3PY     | 0.00036  |
|                |   |   |     |          | 30 | 3PZ     | 0.00273  |
|                |   |   |     |          | 31 | 7 Si 1S | 0.00002  |
|                |   |   |     |          | 32 | 2S      | -0.00005 |
|                |   |   |     |          | 33 | 2PX     | 0.00009  |
|                |   |   |     |          | 34 | 2PY     | 0.00001  |

|    |    |      |          |    |    |      |          |
|----|----|------|----------|----|----|------|----------|
| 35 |    | 2PZ  | 0.00731  | 66 |    | 2PX  | 0.00000  |
| 36 |    | 3S   | 0.00019  | 67 |    | 2PY  | -0.00020 |
| 37 |    | 3PX  | -0.00023 | 68 |    | 2PZ  | -0.00118 |
| 38 |    | 3PY  | -0.00001 | 69 | 21 | H 1S | -0.00381 |
| 39 |    | 3PZ  | -0.00688 | 70 | 22 | H 1S | 0.00373  |
| 40 | 8  | C 1S | -0.00007 | 71 | 23 | H 1S | 0.00002  |
| 41 |    | 2S   | 0.00067  | 72 | 24 | C 1S | 0.01476  |
| 42 |    | 2PX  | 0.00542  | 73 |    | 2S   | -0.06890 |
| 43 |    | 2PY  | -0.00238 | 74 |    | 2PX  | 0.04648  |
| 44 |    | 2PZ  | 0.00012  | 75 |    | 2PY  | -0.05303 |
| 45 | 9  | H 1S | -0.01530 | 76 |    | 2PZ  | 0.09178  |
| 46 | 10 | H 1S | 0.01449  | 77 | 25 | H 1S | 0.01258  |
| 47 | 11 | H 1S | 0.00023  | 78 | 26 | H 1S | 0.03272  |
| 48 | 12 | C 1S | 0.00005  | 79 | 27 | H 1S | 0.01590  |
| 49 |    | 2S   | -0.00058 | 80 | 28 | C 1S | 0.00005  |
| 50 |    | 2PX  | -0.00537 | 81 |    | 2S   | -0.00022 |
| 51 |    | 2PY  | 0.00221  | 82 |    | 2PX  | 0.00013  |
| 52 |    | 2PZ  | 0.00002  | 83 |    | 2PY  | -0.00032 |
| 53 | 13 | H 1S | -0.01447 | 84 |    | 2PZ  | -0.05362 |
| 54 | 14 | H 1S | 0.01511  | 85 | 29 | H 1S | 0.00015  |
| 55 | 15 | H 1S | -0.00015 | 86 | 30 | H 1S | -0.09872 |
| 56 | 16 | C 1S | -0.01474 | 87 | 31 | H 1S | 0.09870  |
| 57 |    | 2S   | 0.06878  | 88 | 32 | C 1S | 0.00000  |
| 58 |    | 2PX  | -0.04576 | 89 |    | 2S   | -0.00001 |
| 59 |    | 2PY  | 0.05335  | 90 |    | 2PX  | -0.00024 |
| 60 |    | 2PZ  | 0.09157  | 91 |    | 2PY  | 0.00004  |
| 61 | 17 | H 1S | -0.01574 | 92 |    | 2PZ  | 0.05021  |
| 62 | 18 | H 1S | -0.03273 | 93 | 33 | H 1S | -0.09294 |
| 63 | 19 | H 1S | -0.01263 | 94 | 34 | H 1S | 0.09256  |
| 64 | 20 | C 1S | -0.00002 | 95 | 35 | H 1S | 0.00037  |
| 65 |    | 2S   | 0.00007  |    |    |      |          |

Summary of Natural Population Analysis:

| Atom | No | Natural Charge | Natural Population |         |         |          |
|------|----|----------------|--------------------|---------|---------|----------|
|      |    |                | Core               | Valence | Rydberg | Total    |
| C    | 1  | -0.39001       | 1.99980            | 4.39020 | 0.00000 | 6.39001  |
| C    | 2  | 0.01383        | 1.99986            | 3.98630 | 0.00000 | 5.98617  |
| C    | 3  | 0.01121        | 1.99985            | 3.98894 | 0.00000 | 5.98879  |
| C    | 4  | -0.26642       | 1.99985            | 4.26657 | 0.00000 | 6.26642  |
| H    | 5  | 0.03443        | 0.00000            | 0.96557 | 0.00000 | 0.96557  |
| Si   | 6  | 0.83556        | 9.99983            | 3.16460 | 0.00000 | 13.16444 |
| Si   | 7  | 0.85501        | 9.99989            | 3.14510 | 0.00000 | 13.14499 |
| C    | 8  | -0.36913       | 1.99995            | 4.36918 | 0.00000 | 6.36913  |
| H    | 9  | 0.05594        | 0.00000            | 0.94406 | 0.00000 | 0.94406  |
| H    | 10 | 0.05477        | 0.00000            | 0.94523 | 0.00000 | 0.94523  |
| H    | 11 | 0.05737        | 0.00000            | 0.94263 | 0.00000 | 0.94263  |
| C    | 12 | -0.36907       | 1.99995            | 4.36912 | 0.00000 | 6.36907  |
| H    | 13 | 0.05472        | 0.00000            | 0.94528 | 0.00000 | 0.94528  |
| H    | 14 | 0.05594        | 0.00000            | 0.94406 | 0.00000 | 0.94406  |
| H    | 15 | 0.05738        | 0.00000            | 0.94262 | 0.00000 | 0.94262  |
| C    | 16 | -0.37205       | 1.99995            | 4.37210 | 0.00000 | 6.37205  |
| H    | 17 | 0.05219        | 0.00000            | 0.94781 | 0.00000 | 0.94781  |
| H    | 18 | 0.05182        | 0.00000            | 0.94818 | 0.00000 | 0.94818  |
| H    | 19 | 0.05234        | 0.00000            | 0.94766 | 0.00000 | 0.94766  |
| C    | 20 | -0.37914       | 1.99995            | 4.37919 | 0.00000 | 6.37914  |
| H    | 21 | 0.04968        | 0.00000            | 0.95032 | 0.00000 | 0.95032  |
| H    | 22 | 0.04957        | 0.00000            | 0.95043 | 0.00000 | 0.95043  |
| H    | 23 | 0.05227        | 0.00000            | 0.94773 | 0.00000 | 0.94773  |
| C    | 24 | -0.37202       | 1.99995            | 4.37207 | 0.00000 | 6.37202  |
| H    | 25 | 0.05235        | 0.00000            | 0.94765 | 0.00000 | 0.94765  |
| H    | 26 | 0.05181        | 0.00000            | 0.94819 | 0.00000 | 0.94819  |
| H    | 27 | 0.05220        | 0.00000            | 0.94780 | 0.00000 | 0.94780  |
| C    | 28 | -0.20266       | 1.99997            | 4.20269 | 0.00000 | 6.20266  |
| H    | 29 | 0.05552        | 0.00000            | 0.94448 | 0.00000 | 0.94448  |
| H    | 30 | 0.06322        | 0.00000            | 0.93678 | 0.00000 | 0.93678  |
| H    | 31 | 0.06321        | 0.00000            | 0.93679 | 0.00000 | 0.93679  |
| C    | 32 | -0.19822       | 1.99997            | 4.19825 | 0.00000 | 6.19822  |

|           |    |         |          |          |         |           |
|-----------|----|---------|----------|----------|---------|-----------|
| H         | 33 | 0.06253 | 0.00000  | 0.93747  | 0.00000 | 0.93747   |
| H         | 34 | 0.06251 | 0.00000  | 0.93749  | 0.00000 | 0.93749   |
| H         | 35 | 0.06132 | 0.00000  | 0.93868  | 0.00000 | 0.93868   |
| =====     |    |         |          |          |         |           |
| * Total * |    | 0.00000 | 41.99875 | 74.00125 | 0.00000 | 116.00000 |

## 2-5. NBO analysis for donor-acceptor interaction

Note: The corresponding interactions between silyl groups and the cation centers were marked in red.

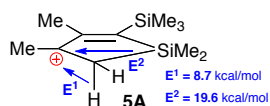

see: No. 9-1; No. 10-1

### SECOND ORDER PERTURBATION THEORY ANALYSIS OF FOCK MATRIX IN NBO BASIS

Threshold for printing: 0.50 kcal/mol

| Donor NBO (i)       | Acceptor NBO (j)      | E(2)<br>kcal/mol | E(j)-E(i)<br>a.u. | F(i,j)<br>a.u. |
|---------------------|-----------------------|------------------|-------------------|----------------|
| =====               |                       |                  |                   |                |
| within unit 1       |                       |                  |                   |                |
| 1. BD ( 1) C 1- C 2 | 86. RY*( 1) C 3       | 1.25             | 1.78              | 0.042          |
| 1. BD ( 1) C 1- C 2 | 254. BD*( 1) C 1-Si 6 | 1.24             | 0.96              | 0.031          |
| 1. BD ( 1) C 1- C 2 | 255. BD*( 1) C 1-Si 7 | 1.55             | 0.98              | 0.035          |
| 1. BD ( 1) C 1- C 2 | 256. BD*( 1) C 2- C 3 | 2.72             | 1.20              | 0.051          |
| 1. BD ( 1) C 1- C 2 | 257. BD*( 1) C 2- C28 | 2.60             | 1.12              | 0.048          |
| 1. BD ( 1) C 1- C 2 | 259. BD*( 1) C 3- C32 | 3.15             | 1.13              | 0.053          |
| 1. BD ( 1) C 1- C 2 | 261. BD*( 1) C 4-Si 6 | 0.73             | 0.93              | 0.023          |
| 2. BD ( 2) C 1- C 2 | 59. LP*( 1) C 3       | 73.97            | 0.13              | 0.095          |
| 2. BD ( 2) C 1- C 2 | 92. RY*( 7) C 3       | 0.64             | 1.71              | 0.033          |
| 2. BD ( 2) C 1- C 2 | 220. RY*( 2) C28      | 0.77             | 1.21              | 0.030          |
| 2. BD ( 2) C 1- C 2 | 253. BD*( 2) C 1- C 2 | 1.50             | 0.29              | 0.020          |
| 2. BD ( 2) C 1- C 2 | 263. BD*( 1)Si 6- C 8 | 2.19             | 0.52              | 0.033          |
| 2. BD ( 2) C 1- C 2 | 264. BD*( 1)Si 6- C12 | 1.38             | 0.53              | 0.026          |
| 2. BD ( 2) C 1- C 2 | 265. BD*( 1)Si 7- C16 | 1.02             | 0.55              | 0.023          |
| 2. BD ( 2) C 1- C 2 | 267. BD*( 1)Si 7- C24 | 1.18             | 0.55              | 0.025          |
| 2. BD ( 2) C 1- C 2 | 284. BD*( 1) C28- H30 | 1.45             | 0.73              | 0.032          |
| 2. BD ( 2) C 1- C 2 | 285. BD*( 1) C28- H31 | 2.56             | 0.72              | 0.042          |
| 3. BD ( 1) C 1-Si 6 | 73. RY*( 1) C 2       | 1.56             | 1.67              | 0.046          |
| 3. BD ( 1) C 1-Si 6 | 74. RY*( 2) C 2       | 1.46             | 1.41              | 0.041          |
| 3. BD ( 1) C 1-Si 6 | 252. BD*( 1) C 1- C 2 | 1.18             | 1.05              | 0.032          |
| 3. BD ( 1) C 1-Si 6 | 254. BD*( 1) C 1-Si 6 | 0.68             | 0.74              | 0.020          |
| 3. BD ( 1) C 1-Si 6 | 255. BD*( 1) C 1-Si 7 | 1.29             | 0.75              | 0.028          |
| 3. BD ( 1) C 1-Si 6 | 256. BD*( 1) C 2- C 3 | 0.71             | 0.98              | 0.024          |
| 3. BD ( 1) C 1-Si 6 | 257. BD*( 1) C 2- C28 | 10.02            | 0.90              | 0.085          |
| 3. BD ( 1) C 1-Si 6 | 259. BD*( 1) C 3- C32 | 0.73             | 0.91              | 0.023          |
| 3. BD ( 1) C 1-Si 6 | 261. BD*( 1) C 4-Si 6 | 0.94             | 0.71              | 0.023          |
| 3. BD ( 1) C 1-Si 6 | 262. BD*( 1) C 4- H36 | 1.45             | 0.95              | 0.033          |
| 3. BD ( 1) C 1-Si 6 | 263. BD*( 1)Si 6- C 8 | 2.36             | 0.75              | 0.038          |
| 3. BD ( 1) C 1-Si 6 | 264. BD*( 1)Si 6- C12 | 2.46             | 0.76              | 0.039          |
| 3. BD ( 1) C 1-Si 6 | 268. BD*( 1) C 8- H 9 | 0.89             | 0.97              | 0.026          |
| 3. BD ( 1) C 1-Si 6 | 272. BD*( 1) C12- H14 | 0.78             | 0.96              | 0.025          |
| 4. BD ( 1) C 1-Si 7 | 73. RY*( 1) C 2       | 2.74             | 1.67              | 0.061          |
| 4. BD ( 1) C 1-Si 7 | 252. BD*( 1) C 1- C 2 | 2.58             | 1.05              | 0.047          |
| 4. BD ( 1) C 1-Si 7 | 254. BD*( 1) C 1-Si 6 | 1.01             | 0.74              | 0.024          |
| 4. BD ( 1) C 1-Si 7 | 256. BD*( 1) C 2- C 3 | 6.38             | 0.98              | 0.071          |
| 4. BD ( 1) C 1-Si 7 | 265. BD*( 1)Si 7- C16 | 2.09             | 0.78              | 0.036          |
| 4. BD ( 1) C 1-Si 7 | 266. BD*( 1)Si 7- C20 | 2.13             | 0.79              | 0.037          |
| 4. BD ( 1) C 1-Si 7 | 267. BD*( 1)Si 7- C24 | 2.11             | 0.78              | 0.036          |
| 4. BD ( 1) C 1-Si 7 | 275. BD*( 1) C16- H18 | 0.92             | 0.98              | 0.027          |
| 4. BD ( 1) C 1-Si 7 | 279. BD*( 1) C20- H23 | 0.80             | 0.99              | 0.025          |
| 4. BD ( 1) C 1-Si 7 | 281. BD*( 1) C24- H26 | 0.93             | 0.98              | 0.027          |
| 5. BD ( 1) C 2- C 3 | 60. RY*( 1) C 1       | 1.00             | 1.89              | 0.039          |
| 5. BD ( 1) C 2- C 3 | 99. RY*( 1) C 4       | 1.31             | 1.63              | 0.041          |

|                      |                       |       |      |       |
|----------------------|-----------------------|-------|------|-------|
| 5. BD ( 1) C 2- C 3  | 219. RY*( 1) C28      | 0.62  | 1.55 | 0.028 |
| 5. BD ( 1) C 2- C 3  | 235. RY*( 1) C32      | 0.86  | 1.48 | 0.032 |
| 5. BD ( 1) C 2- C 3  | 252. BD*( 1) C 1- C 2 | 2.46  | 1.26 | 0.050 |
| 5. BD ( 1) C 2- C 3  | 255. BD*( 1) C 1-Si 7 | 2.16  | 0.96 | 0.041 |
| 5. BD ( 1) C 2- C 3  | 257. BD*( 1) C 2- C28 | 1.04  | 1.11 | 0.030 |
| 5. BD ( 1) C 2- C 3  | 258. BD*( 1) C 3- C 4 | 0.89  | 1.14 | 0.029 |
| 5. BD ( 1) C 2- C 3  | 259. BD*( 1) C 3- C32 | 0.87  | 1.12 | 0.028 |
| 5. BD ( 1) C 2- C 3  | 262. BD*( 1) C 4- H36 | 1.40  | 1.16 | 0.036 |
| 5. BD ( 1) C 2- C 3  | 283. BD*( 1) C28- H29 | 0.63  | 1.19 | 0.024 |
| 5. BD ( 1) C 2- C 3  | 288. BD*( 1) C32- H35 | 0.88  | 1.15 | 0.029 |
| 6. BD ( 1) C 2- C28  | 60. RY*( 1) C 1       | 0.59  | 1.81 | 0.029 |
| 6. BD ( 1) C 2- C28  | 86. RY*( 1) C 3       | 0.86  | 1.69 | 0.034 |
| 6. BD ( 1) C 2- C28  | 252. BD*( 1) C 1- C 2 | 2.87  | 1.18 | 0.052 |
| 6. BD ( 1) C 2- C28  | 254. BD*( 1) C 1-Si 6 | 2.00  | 0.86 | 0.037 |
| 6. BD ( 1) C 2- C28  | 256. BD*( 1) C 2- C 3 | 1.28  | 1.11 | 0.034 |
| 6. BD ( 1) C 2- C28  | 258. BD*( 1) C 3- C 4 | 2.22  | 1.06 | 0.043 |
| 7. BD ( 1) C 3- C 4  | 74. RY*( 2) C 2       | 1.34  | 1.60 | 0.041 |
| 7. BD ( 1) C 3- C 4  | 235. RY*( 1) C32      | 0.85  | 1.47 | 0.032 |
| 7. BD ( 1) C 3- C 4  | 254. BD*( 1) C 1-Si 6 | 0.99  | 0.93 | 0.027 |
| 7. BD ( 1) C 3- C 4  | 256. BD*( 1) C 2- C 3 | 1.27  | 1.17 | 0.035 |
| 7. BD ( 1) C 3- C 4  | 257. BD*( 1) C 2- C28 | 2.89  | 1.09 | 0.050 |
| 7. BD ( 1) C 3- C 4  | 259. BD*( 1) C 3- C32 | 0.89  | 1.10 | 0.028 |
| 7. BD ( 1) C 3- C 4  | 260. BD*( 1) C 4- H 5 | 0.56  | 1.10 | 0.022 |
| 7. BD ( 1) C 3- C 4  | 261. BD*( 1) C 4-Si 6 | 1.31  | 0.90 | 0.031 |
| 7. BD ( 1) C 3- C 4  | 262. BD*( 1) C 4- H36 | 0.94  | 1.14 | 0.029 |
| 7. BD ( 1) C 3- C 4  | 264. BD*( 1)Si 6- C12 | 0.50  | 0.95 | 0.020 |
| 7. BD ( 1) C 3- C 4  | 286. BD*( 1) C32- H33 | 1.22  | 1.14 | 0.033 |
| 8. BD ( 1) C 3- C32  | 73. RY*( 1) C 2       | 0.90  | 1.85 | 0.037 |
| 8. BD ( 1) C 3- C32  | 74. RY*( 2) C 2       | 0.57  | 1.58 | 0.027 |
| 8. BD ( 1) C 3- C32  | 99. RY*( 1) C 4       | 0.70  | 1.60 | 0.030 |
| 8. BD ( 1) C 3- C32  | 252. BD*( 1) C 1- C 2 | 2.32  | 1.23 | 0.048 |
| 8. BD ( 1) C 3- C32  | 256. BD*( 1) C 2- C 3 | 1.05  | 1.16 | 0.031 |
| 8. BD ( 1) C 3- C32  | 258. BD*( 1) C 3- C 4 | 0.87  | 1.11 | 0.028 |
| 8. BD ( 1) C 3- C32  | 260. BD*( 1) C 4- H 5 | 0.56  | 1.09 | 0.022 |
| 8. BD ( 1) C 3- C32  | 261. BD*( 1) C 4-Si 6 | 1.15  | 0.88 | 0.029 |
| 8. BD ( 1) C 3- C32  | 286. BD*( 1) C32- H33 | 0.53  | 1.12 | 0.022 |
| 8. BD ( 1) C 3- C32  | 287. BD*( 1) C32- H34 | 0.54  | 1.09 | 0.022 |
| 8. BD ( 1) C 3- C32  | 288. BD*( 1) C32- H35 | 0.53  | 1.12 | 0.022 |
| 9. BD ( 1) C 4- H 5  | 59. LP*( 1) C 3       | 8.73  | 0.38 | 0.061 |
| 9. BD ( 1) C 4- H 5  | 254. BD*( 1) C 1-Si 6 | 0.61  | 0.76 | 0.019 |
| 9. BD ( 1) C 4- H 5  | 258. BD*( 1) C 3- C 4 | 0.72  | 0.95 | 0.024 |
| 9. BD ( 1) C 4- H 5  | 259. BD*( 1) C 3- C32 | 1.95  | 0.93 | 0.039 |
| 9. BD ( 1) C 4- H 5  | 261. BD*( 1) C 4-Si 6 | 4.30  | 0.72 | 0.050 |
| 9. BD ( 1) C 4- H 5  | 263. BD*( 1)Si 6- C 8 | 0.87  | 0.77 | 0.023 |
| 10. BD ( 1) C 4-Si 6 | 59. LP*( 1) C 3       | 19.62 | 0.29 | 0.076 |
| 10. BD ( 1) C 4-Si 6 | 87. RY*( 2) C 3       | 0.91  | 1.45 | 0.034 |
| 10. BD ( 1) C 4-Si 6 | 252. BD*( 1) C 1- C 2 | 0.82  | 0.98 | 0.026 |
| 10. BD ( 1) C 4-Si 6 | 254. BD*( 1) C 1-Si 6 | 2.96  | 0.67 | 0.041 |
| 10. BD ( 1) C 4-Si 6 | 255. BD*( 1) C 1-Si 7 | 0.78  | 0.68 | 0.021 |
| 10. BD ( 1) C 4-Si 6 | 258. BD*( 1) C 3- C 4 | 1.60  | 0.86 | 0.035 |
| 10. BD ( 1) C 4-Si 6 | 259. BD*( 1) C 3- C32 | 4.64  | 0.84 | 0.058 |
| 10. BD ( 1) C 4-Si 6 | 261. BD*( 1) C 4-Si 6 | 0.73  | 0.63 | 0.020 |
| 10. BD ( 1) C 4-Si 6 | 262. BD*( 1) C 4- H36 | 1.79  | 0.88 | 0.037 |
| 10. BD ( 1) C 4-Si 6 | 263. BD*( 1)Si 6- C 8 | 4.68  | 0.68 | 0.052 |
| 10. BD ( 1) C 4-Si 6 | 264. BD*( 1)Si 6- C12 | 3.03  | 0.69 | 0.042 |
| 10. BD ( 1) C 4-Si 6 | 269. BD*( 1) C 8- H10 | 1.08  | 0.89 | 0.029 |
| 10. BD ( 1) C 4-Si 6 | 271. BD*( 1) C12- H13 | 0.89  | 0.90 | 0.026 |
| 11. BD ( 1) C 4- H36 | 86. RY*( 1) C 3       | 0.51  | 1.58 | 0.025 |
| 11. BD ( 1) C 4- H36 | 256. BD*( 1) C 2- C 3 | 4.26  | 1.00 | 0.059 |
| 11. BD ( 1) C 4- H36 | 258. BD*( 1) C 3- C 4 | 0.97  | 0.95 | 0.027 |
| 12. BD ( 1)Si 6- C 8 | 253. BD*( 2) C 1- C 2 | 1.34  | 0.52 | 0.024 |
| 12. BD ( 1)Si 6- C 8 | 254. BD*( 1) C 1-Si 6 | 2.69  | 0.73 | 0.040 |
| 12. BD ( 1)Si 6- C 8 | 261. BD*( 1) C 4-Si 6 | 0.63  | 0.70 | 0.019 |
| 12. BD ( 1)Si 6- C 8 | 264. BD*( 1)Si 6- C12 | 2.80  | 0.76 | 0.041 |
| 12. BD ( 1)Si 6- C 8 | 268. BD*( 1) C 8- H 9 | 0.66  | 0.96 | 0.023 |
| 12. BD ( 1)Si 6- C 8 | 269. BD*( 1) C 8- H10 | 0.71  | 0.96 | 0.024 |
| 12. BD ( 1)Si 6- C 8 | 270. BD*( 1) C 8- H11 | 0.71  | 0.96 | 0.023 |
| 12. BD ( 1)Si 6- C 8 | 273. BD*( 1) C12- H15 | 1.08  | 0.96 | 0.029 |
| 13. BD ( 1)Si 6- C12 | 252. BD*( 1) C 1- C 2 | 0.51  | 1.05 | 0.021 |
| 13. BD ( 1)Si 6- C12 | 253. BD*( 2) C 1- C 2 | 0.62  | 0.53 | 0.016 |
| 13. BD ( 1)Si 6- C12 | 254. BD*( 1) C 1-Si 6 | 2.90  | 0.74 | 0.042 |
| 13. BD ( 1)Si 6- C12 | 261. BD*( 1) C 4-Si 6 | 1.02  | 0.71 | 0.024 |

|                      |                       |       |      |       |
|----------------------|-----------------------|-------|------|-------|
| 13. BD ( 1)Si 6- C12 | 263. BD*( 1)Si 6- C 8 | 2.74  | 0.75 | 0.041 |
| 13. BD ( 1)Si 6- C12 | 270. BD*( 1) C 8- H11 | 1.06  | 0.97 | 0.029 |
| 13. BD ( 1)Si 6- C12 | 271. BD*( 1) C12- H13 | 0.98  | 0.97 | 0.028 |
| 13. BD ( 1)Si 6- C12 | 272. BD*( 1) C12- H14 | 0.82  | 0.97 | 0.025 |
| 13. BD ( 1)Si 6- C12 | 273. BD*( 1) C12- H15 | 0.85  | 0.97 | 0.026 |
| 14. BD ( 1)Si 7- C16 | 253. BD*( 2) C 1- C 2 | 1.15  | 0.49 | 0.021 |
| 14. BD ( 1)Si 7- C16 | 255. BD*( 1) C 1-Si 7 | 2.58  | 0.72 | 0.039 |
| 14. BD ( 1)Si 7- C16 | 266. BD*( 1)Si 7- C20 | 1.86  | 0.75 | 0.034 |
| 14. BD ( 1)Si 7- C16 | 267. BD*( 1)Si 7- C24 | 2.16  | 0.74 | 0.036 |
| 14. BD ( 1)Si 7- C16 | 274. BD*( 1) C16- H17 | 0.79  | 0.95 | 0.025 |
| 14. BD ( 1)Si 7- C16 | 275. BD*( 1) C16- H18 | 0.68  | 0.95 | 0.023 |
| 14. BD ( 1)Si 7- C16 | 276. BD*( 1) C16- H19 | 0.85  | 0.95 | 0.026 |
| 14. BD ( 1)Si 7- C16 | 278. BD*( 1) C20- H22 | 1.18  | 0.95 | 0.030 |
| 14. BD ( 1)Si 7- C16 | 282. BD*( 1) C24- H27 | 1.05  | 0.95 | 0.028 |
| 15. BD ( 1)Si 7- C20 | 252. BD*( 1) C 1- C 2 | 1.89  | 1.02 | 0.039 |
| 15. BD ( 1)Si 7- C20 | 255. BD*( 1) C 1-Si 7 | 2.11  | 0.72 | 0.035 |
| 15. BD ( 1)Si 7- C20 | 265. BD*( 1)Si 7- C16 | 1.90  | 0.75 | 0.034 |
| 15. BD ( 1)Si 7- C20 | 267. BD*( 1)Si 7- C24 | 1.87  | 0.75 | 0.033 |
| 15. BD ( 1)Si 7- C20 | 276. BD*( 1) C16- H19 | 1.17  | 0.96 | 0.030 |
| 15. BD ( 1)Si 7- C20 | 277. BD*( 1) C20- H21 | 0.92  | 0.94 | 0.026 |
| 15. BD ( 1)Si 7- C20 | 278. BD*( 1) C20- H22 | 0.93  | 0.95 | 0.027 |
| 15. BD ( 1)Si 7- C20 | 279. BD*( 1) C20- H23 | 0.93  | 0.95 | 0.027 |
| 15. BD ( 1)Si 7- C20 | 280. BD*( 1) C24- H25 | 1.17  | 0.96 | 0.030 |
| 16. BD ( 1)Si 7- C24 | 253. BD*( 2) C 1- C 2 | 1.28  | 0.49 | 0.023 |
| 16. BD ( 1)Si 7- C24 | 255. BD*( 1) C 1-Si 7 | 2.52  | 0.72 | 0.038 |
| 16. BD ( 1)Si 7- C24 | 265. BD*( 1)Si 7- C16 | 2.17  | 0.74 | 0.036 |
| 16. BD ( 1)Si 7- C24 | 266. BD*( 1)Si 7- C20 | 1.87  | 0.75 | 0.034 |
| 16. BD ( 1)Si 7- C24 | 274. BD*( 1) C16- H17 | 1.06  | 0.95 | 0.029 |
| 16. BD ( 1)Si 7- C24 | 277. BD*( 1) C20- H21 | 1.21  | 0.94 | 0.030 |
| 16. BD ( 1)Si 7- C24 | 280. BD*( 1) C24- H25 | 0.85  | 0.95 | 0.026 |
| 16. BD ( 1)Si 7- C24 | 281. BD*( 1) C24- H26 | 0.68  | 0.95 | 0.023 |
| 16. BD ( 1)Si 7- C24 | 282. BD*( 1) C24- H27 | 0.79  | 0.95 | 0.025 |
| 17. BD ( 1) C 8- H 9 | 254. BD*( 1) C 1-Si 6 | 2.29  | 0.72 | 0.037 |
| 17. BD ( 1) C 8- H 9 | 263. BD*( 1)Si 6- C 8 | 0.54  | 0.73 | 0.018 |
| 18. BD ( 1) C 8- H10 | 261. BD*( 1) C 4-Si 6 | 2.55  | 0.69 | 0.038 |
| 19. BD ( 1) C 8- H11 | 263. BD*( 1)Si 6- C 8 | 0.52  | 0.74 | 0.018 |
| 19. BD ( 1) C 8- H11 | 264. BD*( 1)Si 6- C12 | 2.03  | 0.75 | 0.035 |
| 20. BD ( 1) C12- H13 | 261. BD*( 1) C 4-Si 6 | 2.79  | 0.69 | 0.039 |
| 21. BD ( 1) C12- H14 | 254. BD*( 1) C 1-Si 6 | 2.57  | 0.72 | 0.039 |
| 21. BD ( 1) C12- H14 | 264. BD*( 1)Si 6- C12 | 0.55  | 0.74 | 0.018 |
| 22. BD ( 1) C12- H15 | 263. BD*( 1)Si 6- C 8 | 2.18  | 0.73 | 0.036 |
| 22. BD ( 1) C12- H15 | 264. BD*( 1)Si 6- C12 | 0.51  | 0.74 | 0.018 |
| 23. BD ( 1) C16- H17 | 265. BD*( 1)Si 7- C16 | 0.50  | 0.74 | 0.017 |
| 23. BD ( 1) C16- H17 | 267. BD*( 1)Si 7- C24 | 2.02  | 0.74 | 0.035 |
| 24. BD ( 1) C16- H18 | 255. BD*( 1) C 1-Si 7 | 2.28  | 0.71 | 0.036 |
| 24. BD ( 1) C16- H18 | 265. BD*( 1)Si 7- C16 | 0.62  | 0.74 | 0.019 |
| 25. BD ( 1) C16- H19 | 266. BD*( 1)Si 7- C20 | 1.71  | 0.76 | 0.032 |
| 26. BD ( 1) C20- H21 | 267. BD*( 1)Si 7- C24 | 1.81  | 0.75 | 0.033 |
| 27. BD ( 1) C20- H22 | 265. BD*( 1)Si 7- C16 | 1.81  | 0.75 | 0.033 |
| 28. BD ( 1) C20- H23 | 255. BD*( 1) C 1-Si 7 | 2.30  | 0.71 | 0.036 |
| 28. BD ( 1) C20- H23 | 266. BD*( 1)Si 7- C20 | 0.63  | 0.75 | 0.020 |
| 29. BD ( 1) C24- H25 | 266. BD*( 1)Si 7- C20 | 1.71  | 0.76 | 0.032 |
| 30. BD ( 1) C24- H26 | 255. BD*( 1) C 1-Si 7 | 2.25  | 0.71 | 0.036 |
| 30. BD ( 1) C24- H26 | 267. BD*( 1)Si 7- C24 | 0.62  | 0.74 | 0.019 |
| 31. BD ( 1) C24- H27 | 265. BD*( 1)Si 7- C16 | 2.02  | 0.74 | 0.035 |
| 31. BD ( 1) C24- H27 | 267. BD*( 1)Si 7- C24 | 0.51  | 0.74 | 0.017 |
| 32. BD ( 1) C28- H29 | 74. RY*( 2) C 2       | 0.52  | 1.40 | 0.024 |
| 32. BD ( 1) C28- H29 | 256. BD*( 1) C 2- C 3 | 4.28  | 0.97 | 0.058 |
| 32. BD ( 1) C28- H29 | 257. BD*( 1) C 2- C28 | 0.70  | 0.89 | 0.022 |
| 32. BD ( 1) C28- H29 | 266. BD*( 1)Si 7- C20 | 0.53  | 0.78 | 0.018 |
| 33. BD ( 1) C28- H30 | 252. BD*( 1) C 1- C 2 | 3.69  | 1.04 | 0.055 |
| 33. BD ( 1) C28- H30 | 253. BD*( 2) C 1- C 2 | 2.11  | 0.52 | 0.030 |
| 34. BD ( 1) C28- H31 | 75. RY*( 3) C 2       | 0.82  | 1.43 | 0.031 |
| 34. BD ( 1) C28- H31 | 252. BD*( 1) C 1- C 2 | 1.58  | 1.04 | 0.036 |
| 34. BD ( 1) C28- H31 | 253. BD*( 2) C 1- C 2 | 4.08  | 0.51 | 0.042 |
| 35. BD ( 1) C32- H33 | 59. LP*( 1) C 3       | 1.50  | 0.38 | 0.025 |
| 35. BD ( 1) C32- H33 | 87. RY*( 2) C 3       | 0.69  | 1.54 | 0.029 |
| 35. BD ( 1) C32- H33 | 258. BD*( 1) C 3- C 4 | 4.03  | 0.95 | 0.055 |
| 36. BD ( 1) C32- H34 | 59. LP*( 1) C 3       | 12.77 | 0.37 | 0.072 |
| 36. BD ( 1) C32- H34 | 88. RY*( 3) C 3       | 0.74  | 1.57 | 0.031 |
| 36. BD ( 1) C32- H34 | 256. BD*( 1) C 2- C 3 | 0.74  | 0.98 | 0.024 |
| 37. BD ( 1) C32- H35 | 59. LP*( 1) C 3       | 2.52  | 0.37 | 0.033 |



|                      |                       |      |       |       |
|----------------------|-----------------------|------|-------|-------|
| 37. BD ( 1) C32- H35 | 86. RY*( 1) C 3       | 0.74 | 1.57  | 0.031 |
| 37. BD ( 1) C32- H35 | 256. BD*( 1) C 2- C 3 | 4.13 | 0.99  | 0.057 |
| 38. CR ( 1) C 1      | 74. RY*( 2) C 2       | 2.47 | 10.95 | 0.147 |
| 38. CR ( 1) C 1      | 75. RY*( 3) C 2       | 0.55 | 10.99 | 0.070 |
| 38. CR ( 1) C 1      | 120. RY*( 8)Si 6      | 0.65 | 10.70 | 0.075 |
| 38. CR ( 1) C 1      | 133. RY*( 8)Si 7      | 0.97 | 10.65 | 0.091 |
| 38. CR ( 1) C 1      | 256. BD*( 1) C 2- C 3 | 0.69 | 10.53 | 0.077 |
| 38. CR ( 1) C 1      | 257. BD*( 1) C 2- C28 | 1.18 | 10.45 | 0.100 |
| 39. CR ( 1) C 2      | 61. RY*( 2) C 1       | 1.95 | 10.86 | 0.130 |
| 39. CR ( 1) C 2      | 87. RY*( 2) C 3       | 2.29 | 11.09 | 0.142 |
| 39. CR ( 1) C 2      | 221. RY*( 3) C28      | 1.28 | 10.88 | 0.105 |
| 39. CR ( 1) C 2      | 252. BD*( 1) C 1- C 2 | 0.71 | 10.62 | 0.078 |
| 39. CR ( 1) C 2      | 254. BD*( 1) C 1-Si 6 | 0.77 | 10.31 | 0.081 |
| 39. CR ( 1) C 2      | 255. BD*( 1) C 1-Si 7 | 0.76 | 10.32 | 0.080 |
| 39. CR ( 1) C 2      | 259. BD*( 1) C 3- C32 | 0.62 | 10.48 | 0.073 |
| 40. CR ( 1) C 3      | 73. RY*( 1) C 2       | 1.08 | 11.29 | 0.099 |
| 40. CR ( 1) C 3      | 74. RY*( 2) C 2       | 0.79 | 11.03 | 0.084 |
| 40. CR ( 1) C 3      | 101. RY*( 3) C 4      | 1.67 | 10.85 | 0.120 |
| 40. CR ( 1) C 3      | 237. RY*( 3) C32      | 1.17 | 11.00 | 0.101 |
| 40. CR ( 1) C 3      | 252. BD*( 1) C 1- C 2 | 0.53 | 10.67 | 0.067 |
| 40. CR ( 1) C 3      | 257. BD*( 1) C 2- C28 | 0.57 | 10.52 | 0.069 |
| 41. CR ( 1) C 4      | 86. RY*( 1) C 3       | 1.80 | 11.11 | 0.126 |
| 41. CR ( 1) C 4      | 112. RY*( 1) H 5      | 0.61 | 10.86 | 0.073 |
| 41. CR ( 1) C 4      | 251. RY*( 1) H36      | 0.57 | 10.81 | 0.070 |
| 41. CR ( 1) C 4      | 256. BD*( 1) C 2- C 3 | 0.53 | 10.53 | 0.067 |
| 41. CR ( 1) C 4      | 259. BD*( 1) C 3- C32 | 0.67 | 10.46 | 0.075 |
| 43. CR ( 2)Si 6      | 156. RY*( 2) C12      | 0.51 | 6.65  | 0.052 |
| 43. CR ( 2)Si 6      | 254. BD*( 1) C 1-Si 6 | 0.74 | 6.14  | 0.061 |
| 43. CR ( 2)Si 6      | 255. BD*( 1) C 1-Si 7 | 0.94 | 6.16  | 0.069 |
| 43. CR ( 2)Si 6      | 262. BD*( 1) C 4- H36 | 0.53 | 6.36  | 0.052 |
| 43. CR ( 2)Si 6      | 263. BD*( 1)Si 6- C 8 | 0.82 | 6.15  | 0.064 |
| 43. CR ( 2)Si 6      | 264. BD*( 1)Si 6- C12 | 1.01 | 6.17  | 0.071 |
| 48. CR ( 2)Si 7      | 252. BD*( 1) C 1- C 2 | 0.89 | 6.42  | 0.068 |
| 48. CR ( 2)Si 7      | 254. BD*( 1) C 1-Si 6 | 0.72 | 6.10  | 0.060 |
| 48. CR ( 2)Si 7      | 255. BD*( 1) C 1-Si 7 | 0.91 | 6.12  | 0.068 |
| 48. CR ( 2)Si 7      | 265. BD*( 1)Si 7- C16 | 0.67 | 6.15  | 0.058 |
| 48. CR ( 2)Si 7      | 266. BD*( 1)Si 7- C20 | 0.56 | 6.16  | 0.053 |
| 48. CR ( 2)Si 7      | 267. BD*( 1)Si 7- C24 | 0.67 | 6.15  | 0.058 |
| 52. CR ( 1) C 8      | 118. RY*( 6)Si 6      | 0.66 | 10.57 | 0.075 |
| 52. CR ( 1) C 8      | 152. RY*( 1) H 9      | 0.60 | 10.81 | 0.072 |
| 52. CR ( 1) C 8      | 153. RY*( 1) H10      | 0.61 | 10.82 | 0.073 |
| 52. CR ( 1) C 8      | 154. RY*( 1) H11      | 0.60 | 10.83 | 0.072 |
| 53. CR ( 1) C12      | 116. RY*( 4)Si 6      | 0.56 | 10.67 | 0.069 |
| 53. CR ( 1) C12      | 168. RY*( 1) H13      | 0.64 | 10.83 | 0.075 |
| 53. CR ( 1) C12      | 169. RY*( 1) H14      | 0.59 | 10.81 | 0.071 |
| 53. CR ( 1) C12      | 170. RY*( 1) H15      | 0.59 | 10.82 | 0.071 |
| 54. CR ( 1) C16      | 132. RY*( 7)Si 7      | 0.71 | 10.48 | 0.077 |
| 54. CR ( 1) C16      | 184. RY*( 1) H17      | 0.57 | 10.83 | 0.070 |
| 54. CR ( 1) C16      | 185. RY*( 1) H18      | 0.59 | 10.81 | 0.071 |
| 54. CR ( 1) C16      | 186. RY*( 1) H19      | 0.63 | 10.83 | 0.074 |
| 55. CR ( 1) C20      | 131. RY*( 6)Si 7      | 0.85 | 10.69 | 0.085 |
| 55. CR ( 1) C20      | 200. RY*( 1) H21      | 0.57 | 10.83 | 0.070 |
| 55. CR ( 1) C20      | 201. RY*( 1) H22      | 0.61 | 10.84 | 0.072 |
| 55. CR ( 1) C20      | 202. RY*( 1) H23      | 0.59 | 10.81 | 0.071 |
| 56. CR ( 1) C24      | 132. RY*( 7)Si 7      | 0.99 | 10.48 | 0.091 |
| 56. CR ( 1) C24      | 216. RY*( 1) H25      | 0.64 | 10.83 | 0.074 |
| 56. CR ( 1) C24      | 217. RY*( 1) H26      | 0.59 | 10.80 | 0.071 |
| 56. CR ( 1) C24      | 218. RY*( 1) H27      | 0.58 | 10.82 | 0.070 |
| 57. CR ( 1) C28      | 73. RY*( 1) C 2       | 1.07 | 11.21 | 0.098 |
| 57. CR ( 1) C28      | 232. RY*( 1) H29      | 0.64 | 10.91 | 0.074 |
| 57. CR ( 1) C28      | 233. RY*( 1) H30      | 0.53 | 10.85 | 0.067 |
| 57. CR ( 1) C28      | 234. RY*( 1) H31      | 0.55 | 10.86 | 0.069 |
| 57. CR ( 1) C28      | 252. BD*( 1) C 1- C 2 | 0.86 | 10.59 | 0.086 |
| 57. CR ( 1) C28      | 256. BD*( 1) C 2- C 3 | 0.52 | 10.52 | 0.067 |
| 58. CR ( 1) C32      | 86. RY*( 1) C 3       | 0.99 | 11.12 | 0.094 |
| 58. CR ( 1) C32      | 87. RY*( 2) C 3       | 0.61 | 11.08 | 0.073 |
| 58. CR ( 1) C32      | 248. RY*( 1) H33      | 0.58 | 10.85 | 0.071 |
| 58. CR ( 1) C32      | 249. RY*( 1) H34      | 0.60 | 10.84 | 0.072 |
| 58. CR ( 1) C32      | 250. RY*( 1) H35      | 0.57 | 10.83 | 0.070 |
| 58. CR ( 1) C32      | 256. BD*( 1) C 2- C 3 | 0.59 | 10.54 | 0.071 |
| 58. CR ( 1) C32      | 258. BD*( 1) C 3- C 4 | 0.57 | 10.49 | 0.069 |

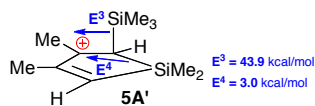

see: No. 2-1; No. 4-1

SECOND ORDER PERTURBATION THEORY ANALYSIS OF FOCK MATRIX IN NBO BASIS

Threshold for printing: 0.50 kcal/mol

| Donor NBO (i)       | Acceptor NBO (j)      | E(2)<br>kcal/mol | E(j)-E(i)<br>a.u. | F(i,j)<br>a.u. |
|---------------------|-----------------------|------------------|-------------------|----------------|
| within unit 1       |                       |                  |                   |                |
| 1. BD ( 1) C 1- C 2 | 86. RY*( 1) C 3       | 0.55             | 1.61              | 0.027          |
| 1. BD ( 1) C 1- C 2 | 87. RY*( 2) C 3       | 0.89             | 1.86              | 0.037          |
| 1. BD ( 1) C 1- C 2 | 158. RY*( 1) C15      | 0.66             | 1.52              | 0.028          |
| 1. BD ( 1) C 1- C 2 | 253. BD*( 1) C 1-Si 6 | 1.43             | 0.92              | 0.033          |
| 1. BD ( 1) C 1- C 2 | 254. BD*( 1) C 1- H23 | 0.93             | 1.15              | 0.029          |
| 1. BD ( 1) C 1- C 2 | 255. BD*( 1) C 1-Si24 | 1.73             | 0.89              | 0.035          |
| 1. BD ( 1) C 1- C 2 | 256. BD*( 1) C 2- C 3 | 1.62             | 1.17              | 0.039          |
| 1. BD ( 1) C 1- C 2 | 257. BD*( 1) C 2- C15 | 1.35             | 1.12              | 0.035          |
| 1. BD ( 1) C 1- C 2 | 260. BD*( 1) C 3- C19 | 2.85             | 1.12              | 0.051          |
| 1. BD ( 1) C 1- C 2 | 262. BD*( 1) C 4-Si 6 | 0.91             | 0.97              | 0.027          |
| 1. BD ( 1) C 1- C 2 | 263. BD*( 1)Si 6- C 7 | 1.05             | 0.98              | 0.029          |
| 1. BD ( 1) C 1- C 2 | 273. BD*( 1) C15- H18 | 0.58             | 1.14              | 0.023          |
| 2. BD ( 1) C 1-Si 6 | 59. LP*( 1) C 2       | 3.04             | 0.34              | 0.034          |
| 2. BD ( 1) C 1-Si 6 | 74. RY*( 2) C 2       | 1.53             | 1.47              | 0.044          |
| 2. BD ( 1) C 1-Si 6 | 252. BD*( 1) C 1- C 2 | 1.57             | 0.95              | 0.035          |
| 2. BD ( 1) C 1-Si 6 | 254. BD*( 1) C 1- H23 | 0.89             | 0.91              | 0.026          |
| 2. BD ( 1) C 1-Si 6 | 255. BD*( 1) C 1-Si24 | 8.56             | 0.65              | 0.067          |
| 2. BD ( 1) C 1-Si 6 | 257. BD*( 1) C 2- C15 | 7.36             | 0.88              | 0.074          |
| 2. BD ( 1) C 1-Si 6 | 258. BD*( 1) C 3- C 4 | 0.73             | 1.07              | 0.026          |
| 2. BD ( 1) C 1-Si 6 | 261. BD*( 1) C 4- H 5 | 1.81             | 0.96              | 0.038          |
| 2. BD ( 1) C 1-Si 6 | 262. BD*( 1) C 4-Si 6 | 1.80             | 0.74              | 0.033          |
| 2. BD ( 1) C 1-Si 6 | 263. BD*( 1)Si 6- C 7 | 1.79             | 0.74              | 0.033          |
| 2. BD ( 1) C 1-Si 6 | 264. BD*( 1)Si 6- C11 | 2.25             | 0.74              | 0.037          |
| 2. BD ( 1) C 1-Si 6 | 265. BD*( 1) C 7- H 8 | 0.64             | 0.94              | 0.023          |
| 2. BD ( 1) C 1-Si 6 | 269. BD*( 1) C11- H13 | 0.84             | 0.95              | 0.026          |
| 2. BD ( 1) C 1-Si 6 | 278. BD*( 1)Si24- C29 | 0.67             | 0.74              | 0.020          |
| 2. BD ( 1) C 1-Si 6 | 279. BD*( 1)Si24- C33 | 0.59             | 0.74              | 0.019          |
| 3. BD ( 1) C 1- H23 | 59. LP*( 1) C 2       | 1.41             | 0.39              | 0.025          |
| 3. BD ( 1) C 1- H23 | 73. RY*( 1) C 2       | 0.72             | 1.56              | 0.030          |
| 3. BD ( 1) C 1- H23 | 74. RY*( 2) C 2       | 0.60             | 1.51              | 0.027          |
| 3. BD ( 1) C 1- H23 | 252. BD*( 1) C 1- C 2 | 1.27             | 0.99              | 0.032          |
| 3. BD ( 1) C 1- H23 | 255. BD*( 1) C 1-Si24 | 3.52             | 0.69              | 0.045          |
| 3. BD ( 1) C 1- H23 | 256. BD*( 1) C 2- C 3 | 5.17             | 0.97              | 0.063          |
| 3. BD ( 1) C 1- H23 | 277. BD*( 1)Si24- C25 | 0.88             | 0.78              | 0.023          |
| 4. BD ( 1) C 1-Si24 | 59. LP*( 1) C 2       | 43.90            | 0.26              | 0.105          |
| 4. BD ( 1) C 1-Si24 | 73. RY*( 1) C 2       | 0.65             | 1.44              | 0.029          |
| 4. BD ( 1) C 1-Si24 | 75. RY*( 3) C 2       | 0.81             | 1.35              | 0.032          |
| 4. BD ( 1) C 1-Si24 | 116. RY*( 4)Si 6      | 0.56             | 1.13              | 0.024          |
| 4. BD ( 1) C 1-Si24 | 252. BD*( 1) C 1- C 2 | 2.76             | 0.86              | 0.047          |
| 4. BD ( 1) C 1-Si24 | 255. BD*( 1) C 1-Si24 | 1.92             | 0.57              | 0.031          |
| 4. BD ( 1) C 1-Si24 | 256. BD*( 1) C 2- C 3 | 0.57             | 0.85              | 0.021          |
| 4. BD ( 1) C 1-Si24 | 257. BD*( 1) C 2- C15 | 0.60             | 0.80              | 0.021          |
| 4. BD ( 1) C 1-Si24 | 264. BD*( 1)Si 6- C11 | 1.52             | 0.66              | 0.030          |
| 4. BD ( 1) C 1-Si24 | 277. BD*( 1)Si24- C25 | 4.29             | 0.65              | 0.051          |
| 4. BD ( 1) C 1-Si24 | 278. BD*( 1)Si24- C29 | 4.37             | 0.66              | 0.051          |
| 4. BD ( 1) C 1-Si24 | 279. BD*( 1)Si24- C33 | 4.33             | 0.66              | 0.051          |
| 4. BD ( 1) C 1-Si24 | 280. BD*( 1) C25- H26 | 0.88             | 0.86              | 0.027          |
| 4. BD ( 1) C 1-Si24 | 283. BD*( 1) C29- H30 | 0.91             | 0.86              | 0.027          |
| 4. BD ( 1) C 1-Si24 | 288. BD*( 1) C33- H36 | 0.77             | 0.86              | 0.025          |
| 5. BD ( 1) C 2- C 3 | 60. RY*( 1) C 1       | 1.14             | 1.69              | 0.039          |
| 5. BD ( 1) C 2- C 3 | 99. RY*( 1) C 4       | 1.21             | 1.92              | 0.043          |
| 5. BD ( 1) C 2- C 3 | 158. RY*( 1) C15      | 0.92             | 1.50              | 0.033          |
| 5. BD ( 1) C 2- C 3 | 174. RY*( 1) C19      | 0.66             | 1.48              | 0.028          |
| 5. BD ( 1) C 2- C 3 | 252. BD*( 1) C 1- C 2 | 1.30             | 1.16              | 0.035          |
| 5. BD ( 1) C 2- C 3 | 254. BD*( 1) C 1- H23 | 1.51             | 1.12              | 0.037          |
| 5. BD ( 1) C 2- C 3 | 257. BD*( 1) C 2- C15 | 0.64             | 1.09              | 0.024          |
| 5. BD ( 1) C 2- C 3 | 258. BD*( 1) C 3- C 4 | 1.93             | 1.28              | 0.044          |

|                      |                       |       |      |       |
|----------------------|-----------------------|-------|------|-------|
| 5. BD ( 1) C 2- C 3  | 260. BD*( 1) C 3- C19 | 1.00  | 1.10 | 0.030 |
| 5. BD ( 1) C 2- C 3  | 261. BD*( 1) C 4- H 5 | 2.27  | 1.18 | 0.046 |
| 5. BD ( 1) C 2- C 3  | 271. BD*( 1) C15- H16 | 1.16  | 1.14 | 0.033 |
| 5. BD ( 1) C 2- C 3  | 276. BD*( 1) C19- H22 | 0.65  | 1.16 | 0.025 |
| 6. BD ( 1) C 2- C15  | 60. RY*( 1) C 1       | 0.53  | 1.67 | 0.027 |
| 6. BD ( 1) C 2- C15  | 87. RY*( 2) C 3       | 1.31  | 1.82 | 0.044 |
| 6. BD ( 1) C 2- C15  | 252. BD*( 1) C 1- C 2 | 1.45  | 1.14 | 0.036 |
| 6. BD ( 1) C 2- C15  | 253. BD*( 1) C 1-Si 6 | 1.90  | 0.88 | 0.037 |
| 6. BD ( 1) C 2- C15  | 256. BD*( 1) C 2- C 3 | 0.78  | 1.12 | 0.027 |
| 6. BD ( 1) C 2- C15  | 258. BD*( 1) C 3- C 4 | 1.80  | 1.26 | 0.043 |
| 6. BD ( 1) C 2- C15  | 271. BD*( 1) C15- H16 | 0.52  | 1.13 | 0.022 |
| 6. BD ( 1) C 2- C15  | 272. BD*( 1) C15- H17 | 0.53  | 1.10 | 0.022 |
| 6. BD ( 1) C 2- C15  | 273. BD*( 1) C15- H18 | 0.59  | 1.10 | 0.023 |
| 7. BD ( 1) C 3- C 4  | 73. RY*( 1) C 2       | 1.27  | 1.77 | 0.043 |
| 7. BD ( 1) C 3- C 4  | 253. BD*( 1) C 1-Si 6 | 0.74  | 0.94 | 0.024 |
| 7. BD ( 1) C 3- C 4  | 256. BD*( 1) C 2- C 3 | 2.35  | 1.18 | 0.047 |
| 7. BD ( 1) C 3- C 4  | 257. BD*( 1) C 2- C15 | 3.12  | 1.13 | 0.053 |
| 7. BD ( 1) C 3- C 4  | 260. BD*( 1) C 3- C19 | 2.54  | 1.14 | 0.048 |
| 7. BD ( 1) C 3- C 4  | 261. BD*( 1) C 4- H 5 | 0.87  | 1.22 | 0.029 |
| 7. BD ( 1) C 3- C 4  | 262. BD*( 1) C 4-Si 6 | 1.21  | 0.99 | 0.031 |
| 8. BD ( 2) C 3- C 4  | 59. LP*( 1) C 2       | 58.13 | 0.14 | 0.090 |
| 8. BD ( 2) C 3- C 4  | 175. RY*( 2) C19      | 0.71  | 1.25 | 0.029 |
| 8. BD ( 2) C 3- C 4  | 259. BD*( 2) C 3- C 4 | 0.92  | 0.30 | 0.016 |
| 8. BD ( 2) C 3- C 4  | 263. BD*( 1)Si 6- C 7 | 1.45  | 0.54 | 0.027 |
| 8. BD ( 2) C 3- C 4  | 264. BD*( 1)Si 6- C11 | 2.67  | 0.53 | 0.036 |
| 8. BD ( 2) C 3- C 4  | 274. BD*( 1) C19- H20 | 2.41  | 0.73 | 0.040 |
| 8. BD ( 2) C 3- C 4  | 275. BD*( 1) C19- H21 | 2.32  | 0.73 | 0.039 |
| 9. BD ( 1) C 3- C19  | 73. RY*( 1) C 2       | 0.90  | 1.68 | 0.035 |
| 9. BD ( 1) C 3- C19  | 99. RY*( 1) C 4       | 0.65  | 1.86 | 0.031 |
| 9. BD ( 1) C 3- C19  | 252. BD*( 1) C 1- C 2 | 2.07  | 1.10 | 0.043 |
| 9. BD ( 1) C 3- C19  | 256. BD*( 1) C 2- C 3 | 1.27  | 1.09 | 0.033 |
| 9. BD ( 1) C 3- C19  | 258. BD*( 1) C 3- C 4 | 2.66  | 1.22 | 0.051 |
| 9. BD ( 1) C 3- C19  | 262. BD*( 1) C 4-Si 6 | 2.06  | 0.89 | 0.038 |
| 10. BD ( 1) C 4- H 5 | 87. RY*( 2) C 3       | 1.49  | 1.68 | 0.045 |
| 10. BD ( 1) C 4- H 5 | 256. BD*( 1) C 2- C 3 | 5.59  | 0.99 | 0.067 |
| 10. BD ( 1) C 4- H 5 | 258. BD*( 1) C 3- C 4 | 1.45  | 1.12 | 0.036 |
| 11. BD ( 1) C 4-Si 6 | 86. RY*( 1) C 3       | 3.77  | 1.40 | 0.065 |
| 11. BD ( 1) C 4-Si 6 | 252. BD*( 1) C 1- C 2 | 0.60  | 0.97 | 0.022 |
| 11. BD ( 1) C 4-Si 6 | 253. BD*( 1) C 1-Si 6 | 2.72  | 0.71 | 0.039 |
| 11. BD ( 1) C 4-Si 6 | 254. BD*( 1) C 1- H23 | 1.28  | 0.94 | 0.031 |
| 11. BD ( 1) C 4-Si 6 | 256. BD*( 1) C 2- C 3 | 0.53  | 0.96 | 0.020 |
| 11. BD ( 1) C 4-Si 6 | 257. BD*( 1) C 2- C15 | 0.89  | 0.91 | 0.026 |
| 11. BD ( 1) C 4-Si 6 | 258. BD*( 1) C 3- C 4 | 1.80  | 1.09 | 0.040 |
| 11. BD ( 1) C 4-Si 6 | 260. BD*( 1) C 3- C19 | 9.07  | 0.92 | 0.082 |
| 11. BD ( 1) C 4-Si 6 | 263. BD*( 1)Si 6- C 7 | 1.89  | 0.77 | 0.034 |
| 11. BD ( 1) C 4-Si 6 | 264. BD*( 1)Si 6- C11 | 1.75  | 0.76 | 0.033 |
| 11. BD ( 1) C 4-Si 6 | 266. BD*( 1) C 7- H 9 | 1.02  | 0.97 | 0.028 |
| 11. BD ( 1) C 4-Si 6 | 268. BD*( 1) C11- H12 | 0.99  | 0.97 | 0.028 |
| 12. BD ( 1)Si 6- C 7 | 253. BD*( 1) C 1-Si 6 | 3.50  | 0.71 | 0.045 |
| 12. BD ( 1)Si 6- C 7 | 259. BD*( 2) C 3- C 4 | 0.61  | 0.53 | 0.016 |
| 12. BD ( 1)Si 6- C 7 | 262. BD*( 1) C 4-Si 6 | 2.76  | 0.76 | 0.041 |
| 12. BD ( 1)Si 6- C 7 | 264. BD*( 1)Si 6- C11 | 2.24  | 0.76 | 0.037 |
| 12. BD ( 1)Si 6- C 7 | 265. BD*( 1) C 7- H 8 | 0.78  | 0.96 | 0.025 |
| 12. BD ( 1)Si 6- C 7 | 266. BD*( 1) C 7- H 9 | 0.85  | 0.96 | 0.026 |
| 12. BD ( 1)Si 6- C 7 | 267. BD*( 1) C 7- H10 | 0.97  | 0.97 | 0.028 |
| 12. BD ( 1)Si 6- C 7 | 270. BD*( 1) C11- H14 | 1.09  | 0.97 | 0.029 |
| 13. BD ( 1)Si 6- C11 | 253. BD*( 1) C 1-Si 6 | 2.00  | 0.69 | 0.033 |
| 13. BD ( 1)Si 6- C11 | 255. BD*( 1) C 1-Si24 | 0.73  | 0.66 | 0.020 |
| 13. BD ( 1)Si 6- C11 | 259. BD*( 2) C 3- C 4 | 1.25  | 0.52 | 0.023 |
| 13. BD ( 1)Si 6- C11 | 262. BD*( 1) C 4-Si 6 | 2.24  | 0.75 | 0.037 |
| 13. BD ( 1)Si 6- C11 | 263. BD*( 1)Si 6- C 7 | 2.07  | 0.75 | 0.035 |
| 13. BD ( 1)Si 6- C11 | 267. BD*( 1) C 7- H10 | 1.30  | 0.96 | 0.032 |
| 13. BD ( 1)Si 6- C11 | 268. BD*( 1) C11- H12 | 0.70  | 0.95 | 0.023 |
| 13. BD ( 1)Si 6- C11 | 269. BD*( 1) C11- H13 | 0.62  | 0.96 | 0.022 |
| 13. BD ( 1)Si 6- C11 | 270. BD*( 1) C11- H14 | 0.72  | 0.96 | 0.024 |
| 14. BD ( 1) C 7- H 8 | 253. BD*( 1) C 1-Si 6 | 3.24  | 0.69 | 0.042 |
| 14. BD ( 1) C 7- H 8 | 263. BD*( 1)Si 6- C 7 | 0.64  | 0.75 | 0.020 |
| 15. BD ( 1) C 7- H 9 | 117. RY*( 5)Si 6      | 0.51  | 1.11 | 0.021 |
| 15. BD ( 1) C 7- H 9 | 262. BD*( 1) C 4-Si 6 | 2.31  | 0.74 | 0.037 |
| 15. BD ( 1) C 7- H 9 | 263. BD*( 1)Si 6- C 7 | 0.53  | 0.75 | 0.018 |
| 16. BD ( 1) C 7- H10 | 263. BD*( 1)Si 6- C 7 | 0.52  | 0.75 | 0.018 |
| 16. BD ( 1) C 7- H10 | 264. BD*( 1)Si 6- C11 | 1.84  | 0.75 | 0.033 |

|                      |                       |      |       |       |
|----------------------|-----------------------|------|-------|-------|
| 17. BD ( 1) C11- H12 | 262. BD*( 1) C 4-Si 6 | 2.17 | 0.74  | 0.036 |
| 17. BD ( 1) C11- H12 | 264. BD*( 1)Si 6- C11 | 0.54 | 0.74  | 0.018 |
| 18. BD ( 1) C11- H13 | 253. BD*( 1) C 1-Si 6 | 2.19 | 0.69  | 0.035 |
| 18. BD ( 1) C11- H13 | 264. BD*( 1)Si 6- C11 | 0.56 | 0.74  | 0.018 |
| 19. BD ( 1) C11- H14 | 263. BD*( 1)Si 6- C 7 | 1.98 | 0.75  | 0.035 |
| 19. BD ( 1) C11- H14 | 264. BD*( 1)Si 6- C11 | 0.53 | 0.74  | 0.018 |
| 20. BD ( 1) C15- H16 | 73. RY*( 1) C 2       | 0.59 | 1.56  | 0.027 |
| 20. BD ( 1) C15- H16 | 256. BD*( 1) C 2- C 3 | 4.53 | 0.97  | 0.060 |
| 20. BD ( 1) C15- H16 | 257. BD*( 1) C 2- C15 | 0.56 | 0.92  | 0.020 |
| 21. BD ( 1) C15- H17 | 59. LP*( 1) C 2       | 8.70 | 0.37  | 0.061 |
| 21. BD ( 1) C15- H17 | 252. BD*( 1) C 1- C 2 | 2.11 | 0.97  | 0.041 |
| 22. BD ( 1) C15- H18 | 59. LP*( 1) C 2       | 6.56 | 0.37  | 0.053 |
| 22. BD ( 1) C15- H18 | 252. BD*( 1) C 1- C 2 | 2.84 | 0.98  | 0.047 |
| 23. BD ( 1) C19- H20 | 88. RY*( 1) C 3       | 0.52 | 1.43  | 0.025 |
| 23. BD ( 1) C19- H20 | 258. BD*( 1) C 3- C 4 | 2.40 | 1.08  | 0.046 |
| 23. BD ( 1) C19- H20 | 259. BD*( 2) C 3- C 4 | 3.65 | 0.52  | 0.039 |
| 24. BD ( 1) C19- H21 | 88. RY*( 3) C 3       | 0.69 | 1.43  | 0.028 |
| 24. BD ( 1) C19- H21 | 258. BD*( 1) C 3- C 4 | 2.24 | 1.08  | 0.044 |
| 24. BD ( 1) C19- H21 | 259. BD*( 2) C 3- C 4 | 3.65 | 0.52  | 0.039 |
| 25. BD ( 1) C19- H22 | 256. BD*( 1) C 2- C 3 | 5.61 | 0.94  | 0.065 |
| 25. BD ( 1) C19- H22 | 260. BD*( 1) C 3- C19 | 0.65 | 0.90  | 0.022 |
| 26. BD ( 1)Si24- C25 | 255. BD*( 1) C 1-Si24 | 1.29 | 0.67  | 0.027 |
| 26. BD ( 1)Si24- C25 | 278. BD*( 1)Si24- C29 | 2.75 | 0.76  | 0.041 |
| 26. BD ( 1)Si24- C25 | 279. BD*( 1)Si24- C33 | 2.85 | 0.76  | 0.042 |
| 26. BD ( 1)Si24- C25 | 280. BD*( 1) C25- H26 | 0.87 | 0.96  | 0.026 |
| 26. BD ( 1)Si24- C25 | 281. BD*( 1) C25- H27 | 0.92 | 0.96  | 0.027 |
| 26. BD ( 1)Si24- C25 | 282. BD*( 1) C25- H28 | 1.05 | 0.97  | 0.029 |
| 26. BD ( 1)Si24- C25 | 284. BD*( 1) C29- H31 | 1.12 | 0.96  | 0.029 |
| 26. BD ( 1)Si24- C25 | 287. BD*( 1) C33- H35 | 1.02 | 0.96  | 0.028 |
| 27. BD ( 1)Si24- C29 | 255. BD*( 1) C 1-Si24 | 0.77 | 0.66  | 0.020 |
| 27. BD ( 1)Si24- C29 | 277. BD*( 1)Si24- C25 | 2.69 | 0.75  | 0.040 |
| 27. BD ( 1)Si24- C29 | 279. BD*( 1)Si24- C33 | 2.47 | 0.75  | 0.039 |
| 27. BD ( 1)Si24- C29 | 282. BD*( 1) C25- H28 | 1.21 | 0.97  | 0.031 |
| 27. BD ( 1)Si24- C29 | 283. BD*( 1) C29- H30 | 0.88 | 0.96  | 0.026 |
| 27. BD ( 1)Si24- C29 | 284. BD*( 1) C29- H31 | 0.96 | 0.96  | 0.027 |
| 27. BD ( 1)Si24- C29 | 285. BD*( 1) C29- H32 | 1.00 | 0.96  | 0.028 |
| 27. BD ( 1)Si24- C29 | 286. BD*( 1) C33- H34 | 1.19 | 0.97  | 0.030 |
| 28. BD ( 1)Si24- C33 | 252. BD*( 1) C 1- C 2 | 1.13 | 0.96  | 0.029 |
| 28. BD ( 1)Si24- C33 | 255. BD*( 1) C 1-Si24 | 0.70 | 0.66  | 0.019 |
| 28. BD ( 1)Si24- C33 | 277. BD*( 1)Si24- C25 | 2.86 | 0.75  | 0.041 |
| 28. BD ( 1)Si24- C33 | 278. BD*( 1)Si24- C29 | 2.61 | 0.75  | 0.040 |
| 28. BD ( 1)Si24- C33 | 281. BD*( 1) C25- H27 | 1.11 | 0.96  | 0.029 |
| 28. BD ( 1)Si24- C33 | 285. BD*( 1) C29- H32 | 1.22 | 0.96  | 0.031 |
| 28. BD ( 1)Si24- C33 | 286. BD*( 1) C33- H34 | 1.01 | 0.97  | 0.028 |
| 28. BD ( 1)Si24- C33 | 287. BD*( 1) C33- H35 | 0.90 | 0.96  | 0.026 |
| 28. BD ( 1)Si24- C33 | 288. BD*( 1) C33- H36 | 0.79 | 0.96  | 0.025 |
| 29. BD ( 1) C25- H26 | 255. BD*( 1) C 1-Si24 | 3.18 | 0.65  | 0.041 |
| 29. BD ( 1) C25- H26 | 277. BD*( 1)Si24- C25 | 0.61 | 0.73  | 0.019 |
| 30. BD ( 1) C25- H27 | 277. BD*( 1)Si24- C25 | 0.53 | 0.74  | 0.018 |
| 30. BD ( 1) C25- H27 | 279. BD*( 1)Si24- C33 | 2.17 | 0.74  | 0.036 |
| 31. BD ( 1) C25- H28 | 194. RY*( 4)Si24      | 0.75 | 1.03  | 0.025 |
| 31. BD ( 1) C25- H28 | 277. BD*( 1)Si24- C25 | 0.52 | 0.74  | 0.018 |
| 31. BD ( 1) C25- H28 | 278. BD*( 1)Si24- C29 | 1.75 | 0.74  | 0.032 |
| 32. BD ( 1) C29- H30 | 255. BD*( 1) C 1-Si24 | 3.17 | 0.65  | 0.041 |
| 32. BD ( 1) C29- H30 | 278. BD*( 1)Si24- C29 | 0.60 | 0.73  | 0.019 |
| 33. BD ( 1) C29- H31 | 277. BD*( 1)Si24- C25 | 1.98 | 0.73  | 0.034 |
| 33. BD ( 1) C29- H31 | 278. BD*( 1)Si24- C29 | 0.54 | 0.74  | 0.018 |
| 34. BD ( 1) C29- H32 | 278. BD*( 1)Si24- C29 | 0.53 | 0.74  | 0.018 |
| 34. BD ( 1) C29- H32 | 279. BD*( 1)Si24- C33 | 1.83 | 0.74  | 0.033 |
| 35. BD ( 1) C33- H34 | 278. BD*( 1)Si24- C29 | 1.79 | 0.74  | 0.033 |
| 35. BD ( 1) C33- H34 | 279. BD*( 1)Si24- C33 | 0.56 | 0.74  | 0.018 |
| 36. BD ( 1) C33- H35 | 277. BD*( 1)Si24- C25 | 2.19 | 0.73  | 0.036 |
| 36. BD ( 1) C33- H35 | 279. BD*( 1)Si24- C33 | 0.56 | 0.74  | 0.018 |
| 37. BD ( 1) C33- H36 | 255. BD*( 1) C 1-Si24 | 2.96 | 0.65  | 0.040 |
| 37. BD ( 1) C33- H36 | 279. BD*( 1)Si24- C33 | 0.59 | 0.73  | 0.019 |
| 38. CR ( 1) C 1      | 73. RY*( 1) C 2       | 2.10 | 11.08 | 0.136 |
| 38. CR ( 1) C 1      | 79. RY*( 7) C 2       | 0.53 | 12.13 | 0.071 |
| 38. CR ( 1) C 1      | 190. RY*( 1) H23      | 0.60 | 10.88 | 0.072 |
| 38. CR ( 1) C 1      | 198. RY*( 8)Si24      | 0.50 | 10.61 | 0.065 |
| 38. CR ( 1) C 1      | 252. BD*( 1) C 1- C 2 | 0.67 | 10.50 | 0.075 |
| 38. CR ( 1) C 1      | 255. BD*( 1) C 1-Si24 | 0.92 | 10.21 | 0.088 |
| 38. CR ( 1) C 1      | 256. BD*( 1) C 2- C 3 | 0.64 | 10.49 | 0.074 |

|                 |                       |      |       |       |
|-----------------|-----------------------|------|-------|-------|
| 38. CR ( 1) C 1 | 257. BD*( 1) C 2- C15 | 0.81 | 10.44 | 0.082 |
| 39. CR ( 1) C 2 | 61. RY*( 2) C 1       | 1.24 | 10.87 | 0.104 |
| 39. CR ( 1) C 2 | 62. RY*( 3) C 1       | 0.53 | 10.95 | 0.068 |
| 39. CR ( 1) C 2 | 86. RY*( 1) C 3       | 1.61 | 11.00 | 0.119 |
| 39. CR ( 1) C 2 | 160. RY*( 3) C15      | 1.39 | 11.01 | 0.110 |
| 39. CR ( 1) C 2 | 253. BD*( 1) C 1-Si 6 | 0.73 | 10.32 | 0.078 |
| 39. CR ( 1) C 2 | 260. BD*( 1) C 3- C19 | 0.58 | 10.52 | 0.070 |
| 40. CR ( 1) C 3 | 74. RY*( 2) C 2       | 2.16 | 11.06 | 0.138 |
| 40. CR ( 1) C 3 | 100. RY*( 2) C 4      | 2.26 | 10.85 | 0.140 |
| 40. CR ( 1) C 3 | 176. RY*( 3) C19      | 1.33 | 10.88 | 0.107 |
| 40. CR ( 1) C 3 | 257. BD*( 1) C 2- C15 | 0.57 | 10.47 | 0.069 |
| 40. CR ( 1) C 3 | 258. BD*( 1) C 3- C 4 | 0.77 | 10.65 | 0.081 |
| 40. CR ( 1) C 3 | 262. BD*( 1) C 4-Si 6 | 0.86 | 10.32 | 0.085 |
| 41. CR ( 1) C 4 | 86. RY*( 1) C 3       | 1.94 | 10.94 | 0.130 |
| 41. CR ( 1) C 4 | 87. RY*( 2) C 3       | 0.84 | 11.20 | 0.087 |
| 41. CR ( 1) C 4 | 88. RY*( 3) C 3       | 0.59 | 10.99 | 0.072 |
| 41. CR ( 1) C 4 | 112. RY*( 1) H 5      | 0.66 | 10.76 | 0.075 |
| 41. CR ( 1) C 4 | 120. RY*( 8)Si 6      | 0.78 | 10.58 | 0.081 |
| 41. CR ( 1) C 4 | 256. BD*( 1) C 2- C 3 | 0.72 | 10.50 | 0.079 |
| 41. CR ( 1) C 4 | 258. BD*( 1) C 3- C 4 | 0.91 | 10.64 | 0.088 |
| 41. CR ( 1) C 4 | 260. BD*( 1) C 3- C19 | 1.20 | 10.46 | 0.101 |
| 43. CR ( 2)Si 6 | 253. BD*( 1) C 1-Si 6 | 0.90 | 6.11  | 0.067 |
| 43. CR ( 2)Si 6 | 255. BD*( 1) C 1-Si24 | 0.91 | 6.08  | 0.068 |
| 43. CR ( 2)Si 6 | 261. BD*( 1) C 4- H 5 | 1.00 | 6.39  | 0.072 |
| 43. CR ( 2)Si 6 | 262. BD*( 1) C 4-Si 6 | 0.60 | 6.16  | 0.055 |
| 43. CR ( 2)Si 6 | 263. BD*( 1)Si 6- C 7 | 0.86 | 6.17  | 0.066 |
| 43. CR ( 2)Si 6 | 264. BD*( 1)Si 6- C11 | 0.55 | 6.16  | 0.052 |
| 47. CR ( 1) C 7 | 117. RY*( 5)Si 6      | 0.68 | 10.64 | 0.076 |
| 47. CR ( 1) C 7 | 139. RY*( 1) H 8      | 0.59 | 10.82 | 0.071 |
| 47. CR ( 1) C 7 | 140. RY*( 1) H 9      | 0.61 | 10.83 | 0.072 |
| 47. CR ( 1) C 7 | 141. RY*( 1) H10      | 0.66 | 10.86 | 0.076 |
| 48. CR ( 1) C11 | 155. RY*( 1) H12      | 0.59 | 10.81 | 0.071 |
| 48. CR ( 1) C11 | 156. RY*( 1) H13      | 0.60 | 10.81 | 0.072 |
| 48. CR ( 1) C11 | 157. RY*( 1) H14      | 0.60 | 10.83 | 0.072 |
| 49. CR ( 1) C15 | 73. RY*( 1) C 2       | 1.09 | 11.10 | 0.098 |
| 49. CR ( 1) C15 | 74. RY*( 2) C 2       | 0.60 | 11.05 | 0.073 |
| 49. CR ( 1) C15 | 171. RY*( 1) H16      | 0.57 | 10.86 | 0.070 |
| 49. CR ( 1) C15 | 172. RY*( 1) H17      | 0.60 | 10.85 | 0.072 |
| 49. CR ( 1) C15 | 173. RY*( 1) H18      | 0.60 | 10.88 | 0.072 |
| 49. CR ( 1) C15 | 252. BD*( 1) C 1- C 2 | 0.71 | 10.52 | 0.078 |
| 50. CR ( 1) C19 | 87. RY*( 2) C 3       | 1.15 | 11.18 | 0.101 |
| 50. CR ( 1) C19 | 187. RY*( 1) H20      | 0.53 | 10.85 | 0.068 |
| 50. CR ( 1) C19 | 188. RY*( 1) H21      | 0.55 | 10.84 | 0.069 |
| 50. CR ( 1) C19 | 189. RY*( 1) H22      | 0.56 | 10.81 | 0.069 |
| 50. CR ( 1) C19 | 256. BD*( 1) C 2- C 3 | 0.66 | 10.49 | 0.075 |
| 50. CR ( 1) C19 | 258. BD*( 1) C 3- C 4 | 0.75 | 10.63 | 0.080 |
| 52. CR ( 2)Si24 | 255. BD*( 1) C 1-Si24 | 1.15 | 6.05  | 0.076 |
| 52. CR ( 2)Si24 | 277. BD*( 1)Si24- C25 | 0.93 | 6.13  | 0.068 |
| 52. CR ( 2)Si24 | 278. BD*( 1)Si24- C29 | 0.79 | 6.13  | 0.063 |
| 52. CR ( 2)Si24 | 279. BD*( 1)Si24- C33 | 0.78 | 6.13  | 0.062 |
| 56. CR ( 1) C25 | 192. RY*( 2)Si24      | 0.51 | 10.90 | 0.066 |
| 56. CR ( 1) C25 | 194. RY*( 4)Si24      | 0.92 | 10.56 | 0.088 |
| 56. CR ( 1) C25 | 217. RY*( 1) H26      | 0.59 | 10.82 | 0.072 |
| 56. CR ( 1) C25 | 218. RY*( 1) H27      | 0.58 | 10.85 | 0.071 |
| 56. CR ( 1) C25 | 219. RY*( 1) H28      | 0.65 | 10.87 | 0.075 |
| 57. CR ( 1) C29 | 195. RY*( 5)Si24      | 1.18 | 10.56 | 0.100 |
| 57. CR ( 1) C29 | 233. RY*( 1) H30      | 0.59 | 10.81 | 0.071 |
| 57. CR ( 1) C29 | 234. RY*( 1) H31      | 0.57 | 10.82 | 0.070 |
| 57. CR ( 1) C29 | 235. RY*( 1) H32      | 0.59 | 10.85 | 0.071 |
| 58. CR ( 1) C33 | 195. RY*( 5)Si24      | 0.60 | 10.56 | 0.071 |
| 58. CR ( 1) C33 | 249. RY*( 1) H34      | 0.66 | 10.87 | 0.076 |
| 58. CR ( 1) C33 | 250. RY*( 1) H35      | 0.56 | 10.82 | 0.070 |
| 58. CR ( 1) C33 | 251. RY*( 1) H36      | 0.58 | 10.81 | 0.071 |

### 3. Copies for NMR spectra for all compounds

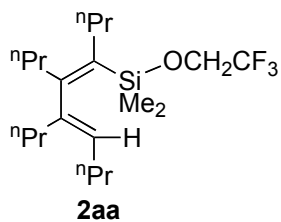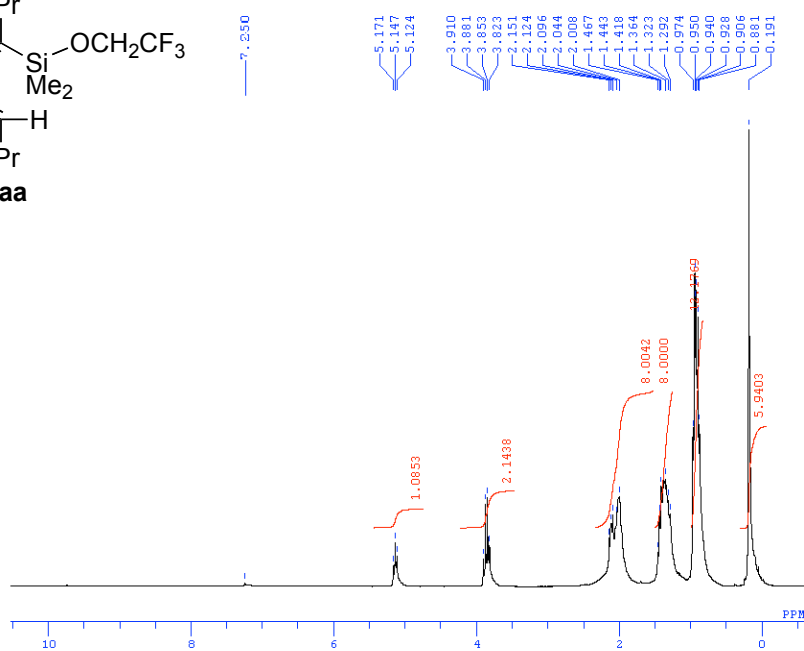

D:\NMR\_Users\Xi Zhe  
COMPT  
DATIM Mon Sep 21 14:12:43  
OBNUC 1H  
EXMOD NON  
OBFREQ 300.40 MHz  
OBSSET 130.00 KHz  
OBFIN 1150.0 Hz  
POINT 32768  
FREQU 6013.2 Hz  
SCANS 8  
ACQTM 5.449 sec  
PD 1.551 sec  
PW1 5.8 us  
IRNUC 1H  
CTEMP 20.7 c  
SLVNT CDCL3  
EXREF 7.25 ppm  
BF 0.09 Hz  
RGAIN 8

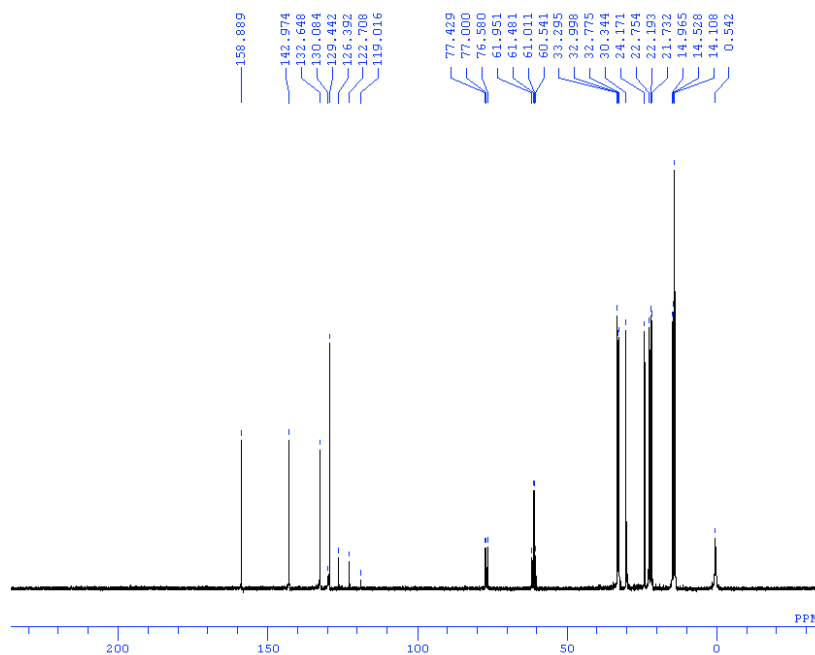

D:\NMR\_Users\Xi Zhe  
COMPT  
DATIM Mon Sep 21 14:08:28  
OBNUC 13C  
EXMOD ECH  
OBFREQ 75.45 MHz  
OBSSET 124.00 KHz  
OBFIN 1840.0 Hz  
POINT 32768  
FREQU 20408.1 Hz  
SCANS 512  
ACQTM 1.606 sec  
PD 1.394 sec  
PW1 5.0 us  
IRNUC 1H  
CTEMP 20.7 c  
SLVNT CDCL3  
EXREF 77.00 ppm  
BF 0.62 Hz  
RGAIN 27

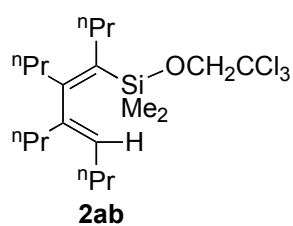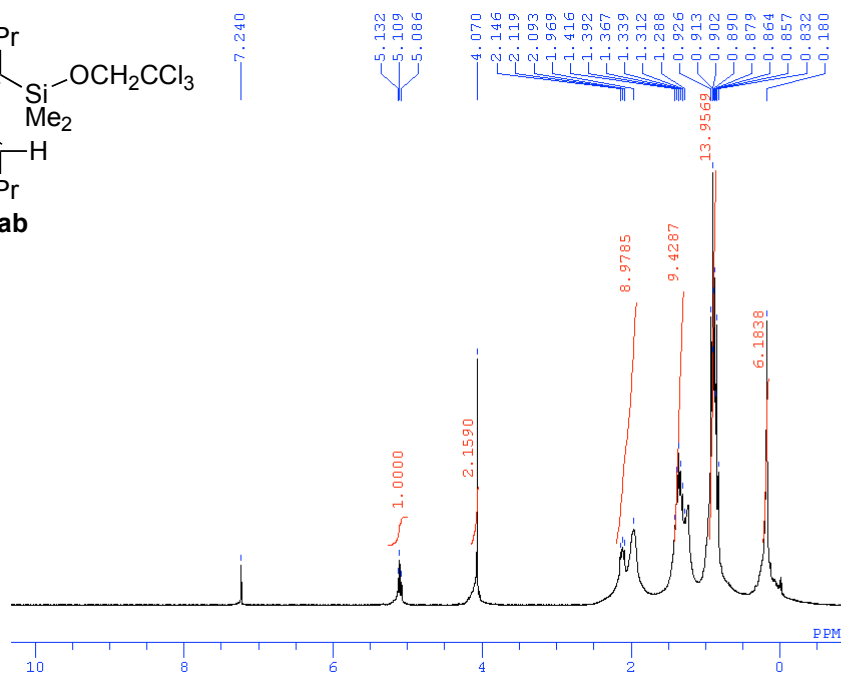

DFILE C:\WINNMR95\CO  
 COMNT  
 DATIM Wed Jan 19 18:  
 OBNUC 1H  
 EXMOD NON  
 OBFRQ 300.40 MH  
 OBSET 130.00 KH  
 OBFIN 1150.0 Hz  
 POINT 16384  
 FREQU 6013.2 Hz  
 SCANS 8  
 ACQTM 2.725 se  
 PD 1.551 se  
 PW1 5.8 us  
 IRNUC 1H  
 CTEMP 10.1 c  
 SLVNT CDCL3  
 EXREF 7.24 pp  
 BF 0.09 Hz  
 RGAIN 14

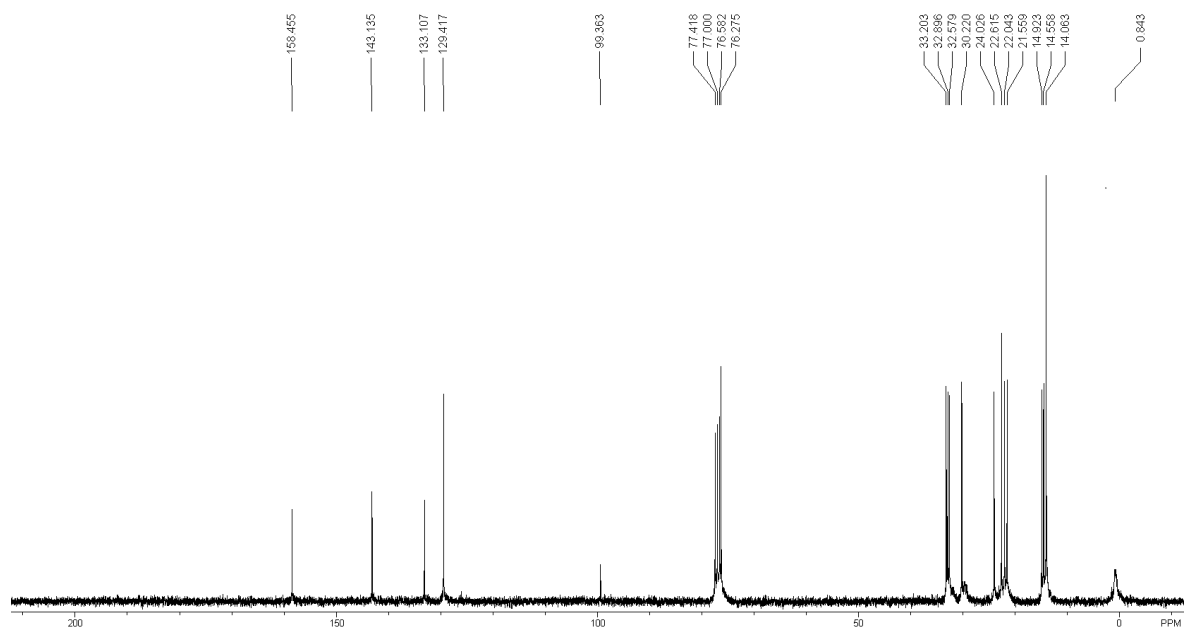

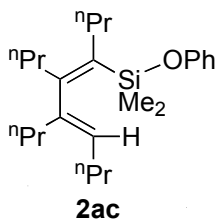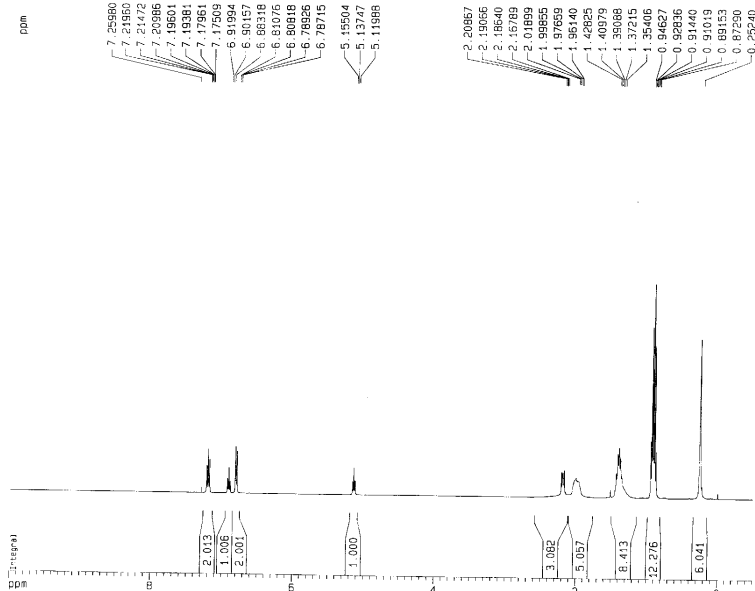

Current Data Parameters  
 NAME h05733  
 EXPNO 1  
 PROCNO 1

F2 - Acquisition Parameters  
 Date\_ 20100421  
 Time 16.47  
 INSTRUM ARX400  
 PROBHD 5 mm Multinu  
 PULPROG zg  
 TD 32768  
 SOLVENT CDCl3  
 NS 8  
 DS 0  
 SWH 6410.256 Hz  
 FIDRES 0.195625 Hz  
 AQ 2.5559540 sec  
 RG 32  
 DW 78.000 usec  
 DE 111.43 usec  
 TE 300.0 K  
 D1 2.00000000 sec  
 P1 3.00 usec  
 DE 111.43 usec  
 SFO1 400.1317143 MHz  
 NUCLEUS 1H

F2 - Processing parameters  
 SI 32768  
 SF 400.1300255 MHz  
 MDW EM  
 SSB 0  
 LB 0.30 Hz  
 GB 0  
 PC 4.00

1D NMR plot parameters  
 CX 20.00 cm  
 F1P 10.000 ppm  
 F1 4001.30 Hz  
 F2P -0.500 ppm  
 F2 -200.07 Hz  
 PRMCM 0.52500 ppm/cm  
 HZCM 210.05827 Hz/cm

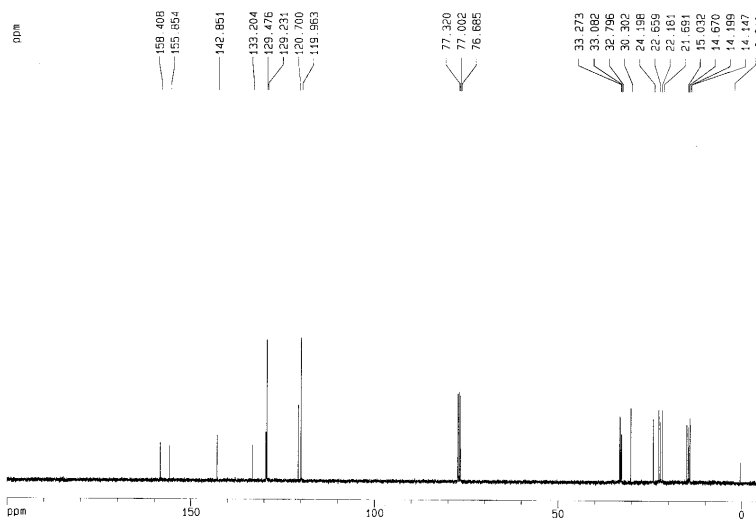

Current Data Parameters  
 NAME c05733  
 EXPNO 1  
 PROCNO 1

F2 - Acquisition Parameters  
 Date\_ 20100421  
 Time 16.51  
 INSTRUM ARX400  
 PROBHD 5 mm Multinu  
 PULPROG zgpg30  
 TD 32768  
 SOLVENT CDCl3  
 NS 133  
 DS 2  
 SWH 25000.000 Hz  
 FIDRES 0.762939 Hz  
 AQ 0.6584100 sec  
 RG 256  
 DW 20.000 usec  
 DE 25.00 usec  
 TE 300.0 K  
 D12 0.00002000 sec  
 D15 22.20 usec  
 CPDPRG waitz16  
 P31 100.00 usec  
 D1 2.00000000 sec  
 P1 3.50 usec  
 DE 25.00 usec  
 SFO1 100.6233660 MHz  
 NUCLEUS 13C  
 D11 0.03000000 sec

F2 - Processing parameters  
 SI 32768  
 SF 100.6127726 MHz  
 MDW EM  
 SSB 0  
 LB 1.00 Hz  
 GB 0  
 PC 0.50

1D NMR plot parameters  
 CX 20.00 cm  
 F1P 200.000 ppm  
 F1 20122.55 Hz  
 F2P -5.000 ppm  
 F2 -503.05 Hz  
 PRMCM 10.25000 ppm/cm  
 HZCM 1031.28101 Hz/cm



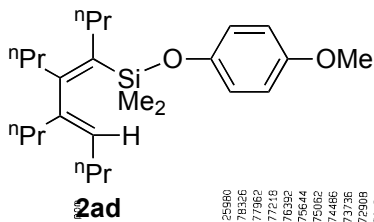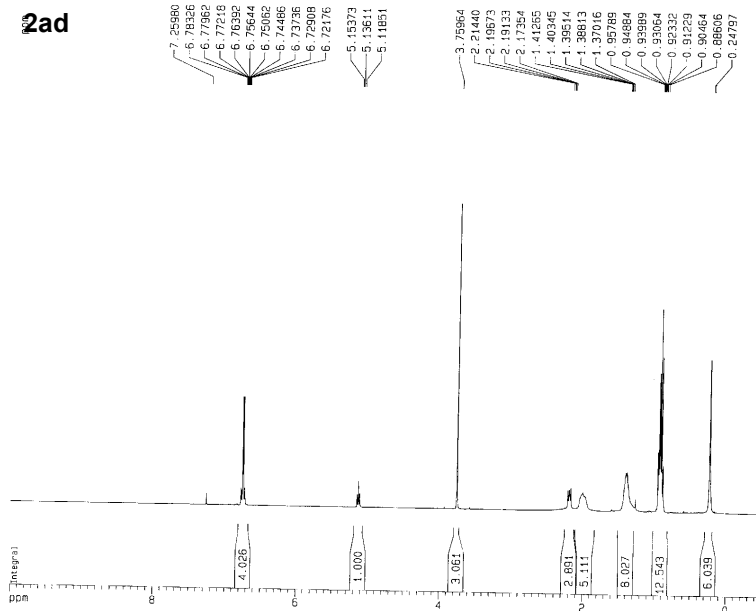

Current Data Parameters  
 NAME: h05828  
 EXPNO: 1  
 PROCNO: 1

F2 - Acquisition Parameters  
 Date\_: 20100428  
 Time: 9.08  
 INSTRUM: ARX400  
 PROBHD: 5 mm Multinu  
 PULPROG: zg  
 TD: 32768  
 SOLVENT: CDCl3  
 NS: 8  
 DS: 0  
 SWH: 6410.256 Hz  
 FIDRES: 0.195625 Hz  
 AQ: 2.5559540 sec  
 RG: 64  
 DW: 78.000 usec  
 DE: 97.50 usec  
 TE: 300.0 K  
 D1: 2.0000000 sec  
 P1: 3.00 usec  
 DE: 97.50 usec  
 SFO1: 400.1316187 MHz  
 NUCLEUS: 1H

F2 - Processing parameters  
 SI: 32768  
 SF: 400.130094 MHz  
 WDW: no  
 SSB: 0  
 LB: 0.00 Hz  
 GB: 0  
 PC: 4.00

1D NMR plot parameters  
 CX: 20.00 cm  
 F1P: 10.000 ppm  
 F1: 4001.30 Hz  
 F2P: -0.500 ppm  
 F2: -200.07 Hz  
 PPMCM: 0.52500 ppm/cm  
 HZCM: 210.06825 Hz/cm

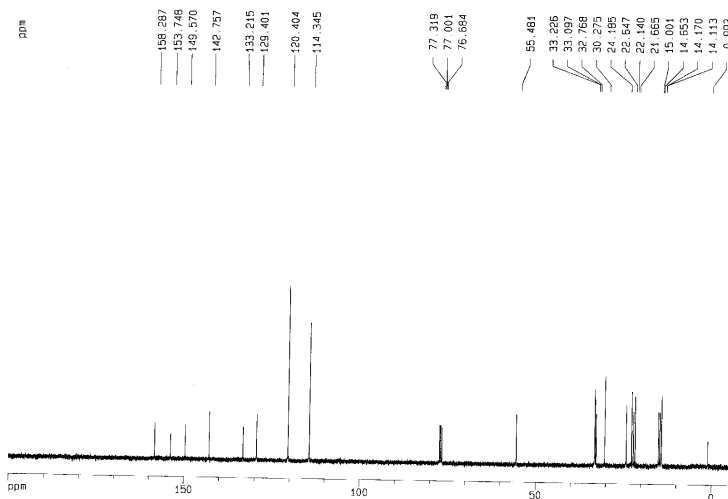

Current Data Parameters  
 NAME: c05828  
 EXPNO: 1  
 PROCNO: 1

F2 - Acquisition Parameters  
 Date\_: 20100428  
 Time: 9.00  
 INSTRUM: ARX400  
 PROBHD: 5 mm Multinu  
 PULPROG: zgpg  
 TD: 32768  
 SOLVENT: CDCl3  
 NS: 143  
 DS: 2  
 SWH: 25000.000 Hz  
 FIDRES: 0.765238 Hz  
 AQ: 0.8554100 sec  
 RG: 256  
 DW: 20.000 usec  
 DE: 25.00 usec  
 TE: 300.0 K  
 D12: 0.0006000 sec  
 Q1.5: 25.20 dB  
 CROPRG: waltz16  
 P31: 100.00 usec  
 D1: 2.0000000 sec  
 P1: 3.50 usec  
 DE: 25.00 usec  
 SFO1: 100.6233680 MHz  
 NUCLEUS: 13C  
 D11: 0.0300000 sec

F2 - Processing parameters  
 SI: 32768  
 SF: 100.6127751 MHz  
 WDW: EM  
 SSB: 0  
 LB: 0.50 Hz  
 GB: 0  
 PC: 0.50

1D NMR plot parameters  
 CX: 20.00 cm  
 F1P: 200.000 ppm  
 F1: 20122.56 Hz  
 F2P: -5.000 ppm  
 F2: -503.06 Hz  
 PPMCM: 10.25000 ppm/cm  
 HZCM: 1031.28101 Hz/cm

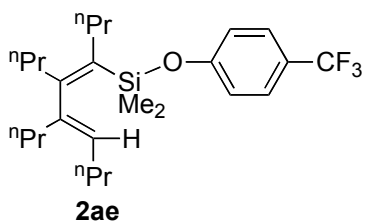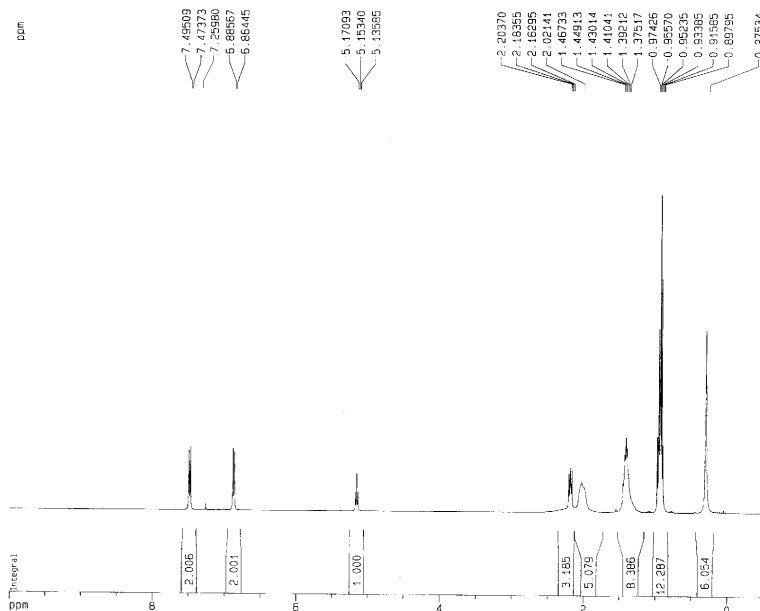

Current Data Parameters  
 NAME h05925  
 EXPNO 1  
 PROCNO 1

F2 - Acquisition Parameters  
 Date\_ 20100430  
 Time 16 57  
 INSTRUM ARX400  
 PROBRD 5 mm Multinu  
 PULPROG zg  
 TD 32768  
 SOLVENT CDCl3  
 NS 8  
 DS 0  
 SWH 6410.256 Hz  
 FIDRES 0.195625 Hz  
 AQ 2.5559540 sec  
 RG 45  
 CW 78.000 usec  
 DE 97.50 usec  
 TE 300.0 K  
 D1 2.00000000 sec  
 P1 3.00 usec  
 DE 97.50 usec  
 SFO1 400.1317143 MHz  
 NUCLEUS 1H

F2 - Processing parameters  
 SI 32768  
 SF 400.1300093 MHz  
 WDW EM  
 SSB 0  
 LB 0.50 Hz  
 GB 0  
 PC 4.00

1D NMR plot parameters  
 CX 20.00 cm  
 F1P 10.000 ppm  
 F1 4001.30 Hz  
 F2P -0.500 ppm  
 F2 -200.07 Hz  
 PPMCM 0.52500 ppm/cm  
 HZCM 210.06825 Hz/cm

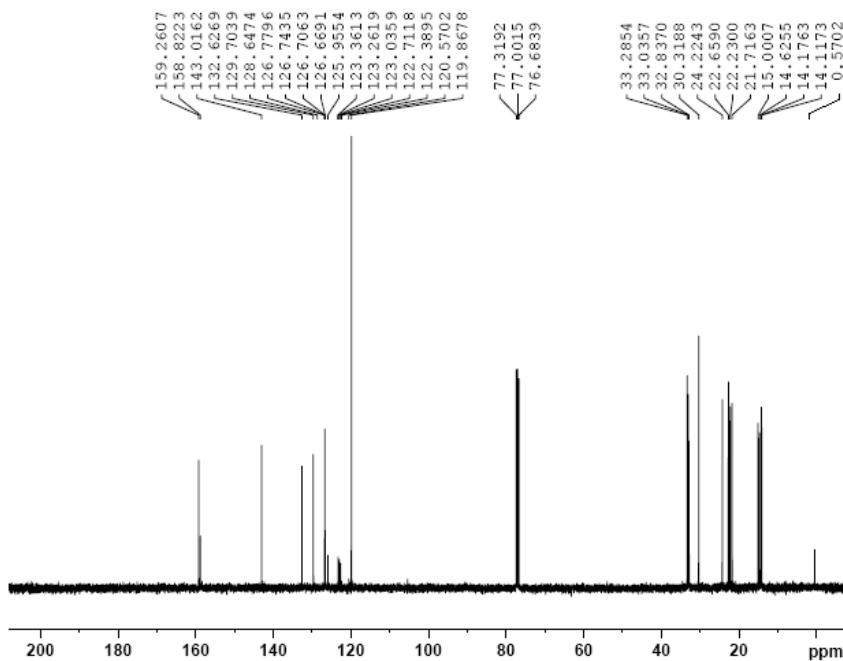

Current Data Parameters  
 NAME c05925  
 EXPNO 1  
 PROCNO 1

F2 - Acquisition Parameters  
 Date\_ 20100430  
 Time 16 58  
 INSTRUM ARX400  
 PROBRD 5 mm Multinu  
 PULPROG zgpg  
 TD 32768  
 SOLVENT CDCl3  
 NS 301  
 DS 2  
 SWH 25000.000 Hz  
 FIDRES 0.762939 Hz  
 AQ 0.6554100 sec  
 RG 256  
 CW 20.000 usec  
 DE 25.00 usec  
 TE 300.0 K  
 D12 0.00002000 sec  
 DL5 22.20 dB  
 CPDPRG Waltz16  
 P31 100.00 usec  
 D1 2.00000000 sec  
 F1 3.50 usec  
 DE 25.00 usec  
 SFO1 100.6233680 MHz  
 NUCLEUS 13C  
 D11 0.03000000 sec

F2 - Processing parameters  
 SI 32768  
 SF 100.6127674 MHz  
 WDW EM  
 SSB 0  
 LB 0.50 Hz  
 GB 0  
 PC 0.50

1D NMR plot parameters  
 CX 20.00 cm  
 F1P 33.438 ppm  
 F1 3364.25 Hz  
 F2P 14.004 ppm  
 F2 1408.95 Hz  
 PPMCM 0.97169 ppm/cm  
 HZCM 97.76487 Hz/cm

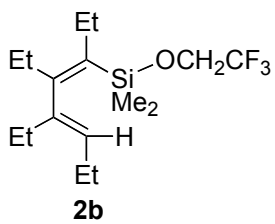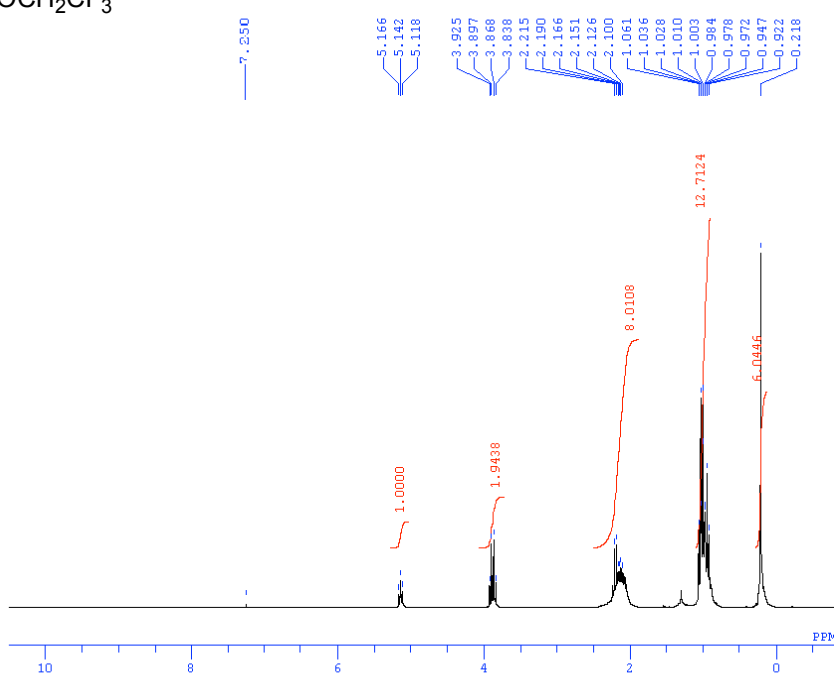

DFILE D:\NMR\_Users\Xi Zhe  
 COMMT  
 DATIM Mon Nov 16 10:01:09  
 OBNUC 1H  
 EXMOD NOM  
 OBFREQ 300.40 MHz  
 OBSET 130.00 KHz  
 OBFIN 1150.0 Hz  
 POINT 32768  
 FREQU 6013.2 Hz  
 SCANS 16  
 ACQTM 5.449 sec  
 PD 1.551 sec  
 PW1 5.8 us  
 IRNUC 1H  
 CTEMP 16.5 c  
 SLVNT CDCL3  
 EXREF 7.25 ppm  
 BF 0.09 Hz  
 RGAIN 8

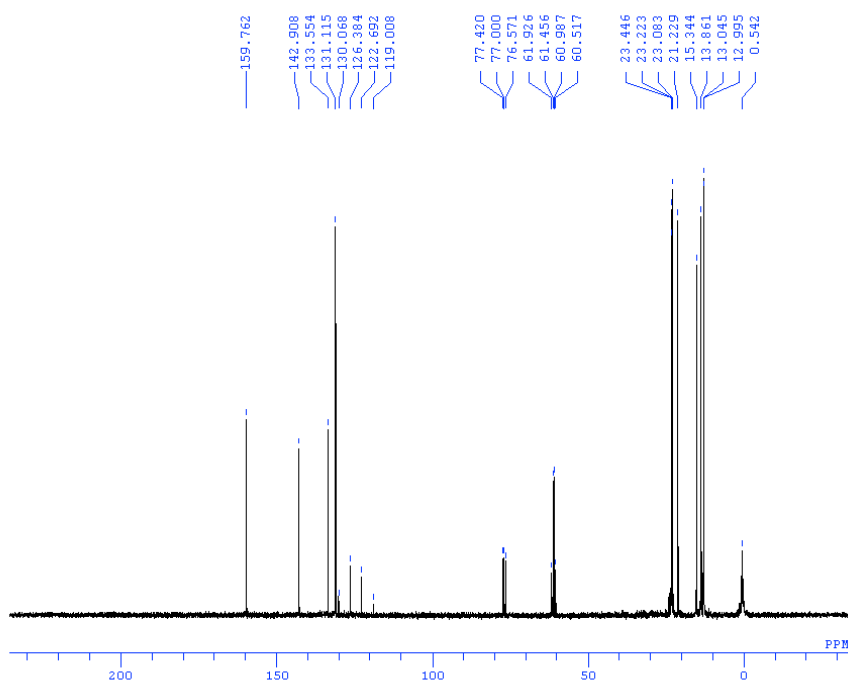

DFILE D:\NMR\_Users\Xi Zhe  
 COMMT  
 DATIM Mon Nov 16 09:54:31  
 OBNUC 13C  
 EXMOD BCM  
 OBFREQ 75.45 MHz  
 OBSET 124.00 KHz  
 OBFIN 1840.0 Hz  
 POINT 32768  
 FREQU 20408.1 Hz  
 SCANS 201  
 ACQTM 1.606 sec  
 PD 1.394 sec  
 PW1 5.0 us  
 IRNUC 1H  
 CTEMP 16.8 c  
 SLVNT CDCL3  
 EXREF 77.00 ppm  
 BF 0.62 Hz  
 RGAIN 24

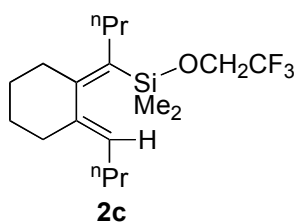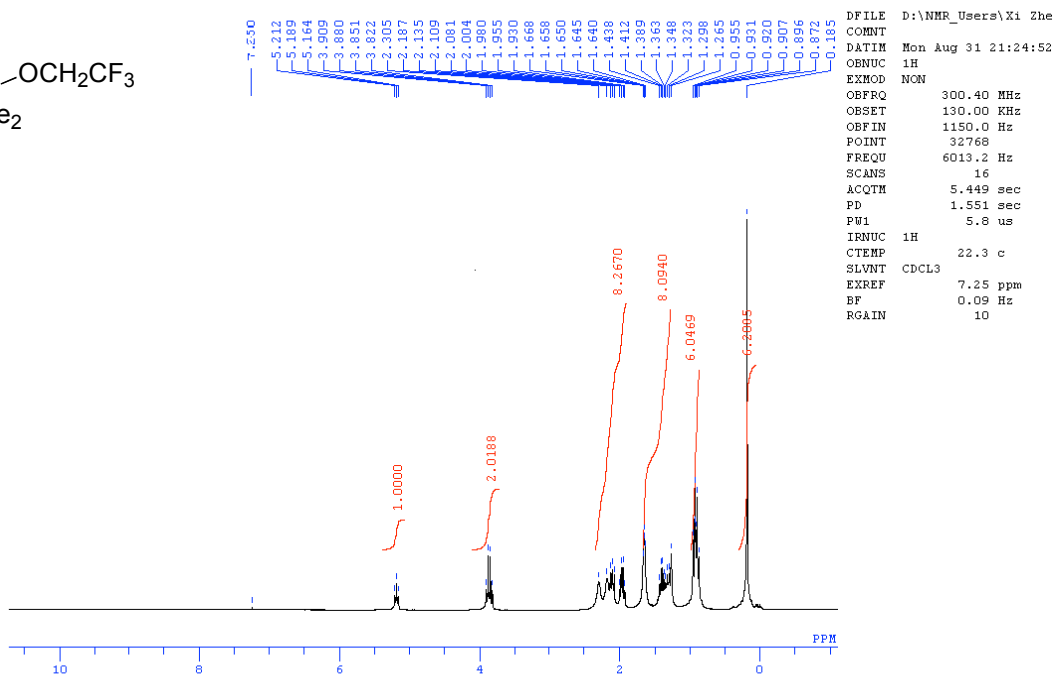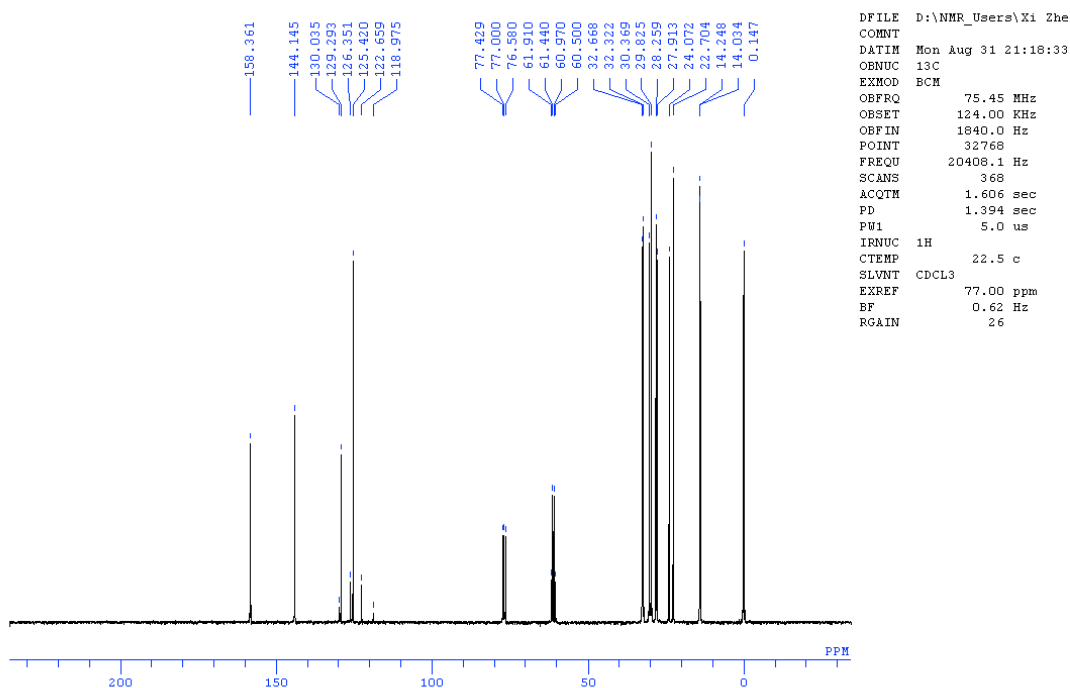

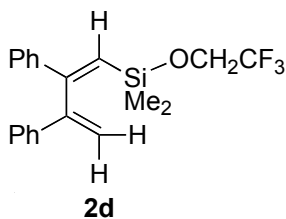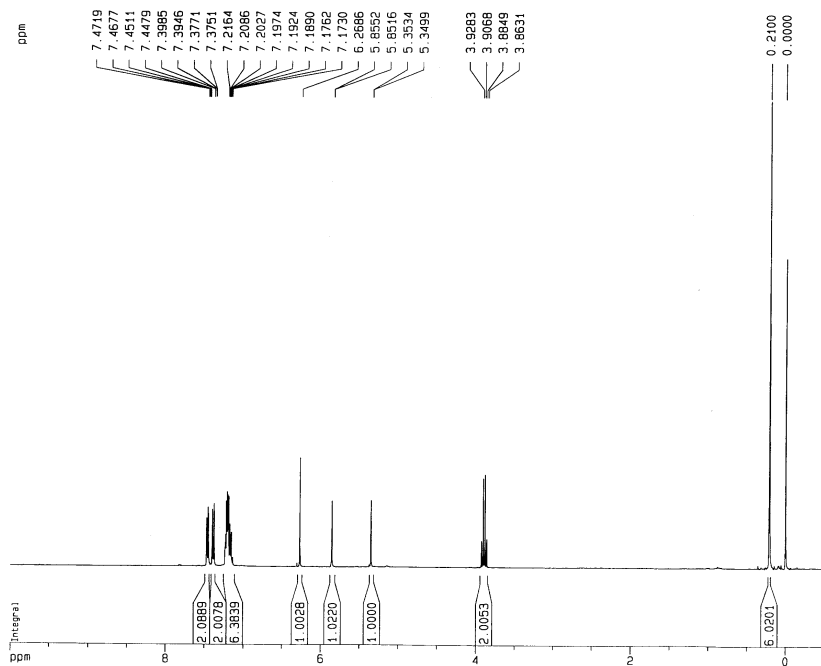

Current Data Parameters  
 NAME h04671  
 EXPNO 1  
 PROCNO 1

F2 - Acquisition Parameters  
 Date\_ 20100204  
 Time 13.37  
 INSTRUM ARX400  
 PROBHD 5 mm Multinu  
 PULPROG zg  
 TD 32768  
 SOLVENT CDCl3  
 NS 8  
 DS 0  
 SWH 8064.516 Hz  
 FIDRES 0.246110 Hz  
 AQ 2.0316660 sec  
 RG 64  
 DW 62.000 usec  
 DE 88.57 usec  
 TE 300.0 K  
 D1 2.00000000 sec  
 P1 3.00 usec  
 DE 88.57 usec  
 SFO1 400.1320153 MHz  
 NUCLEUS 1H

F2 - Processing parameters  
 SI 16384  
 SF 400.1300479 MHz  
 WDW no  
 SSB 0  
 LB 0.00 Hz  
 GB 0  
 PC 4.00

1D NMR plot parameters  
 CX 20.00 cm  
 F1P 10.000 ppm  
 F1 4001.30 Hz  
 F2P -0.500 ppm  
 F2 -200.07 Hz  
 PPMCM 0.52500 ppm/cm  
 HZCM 210.06827 Hz/cm

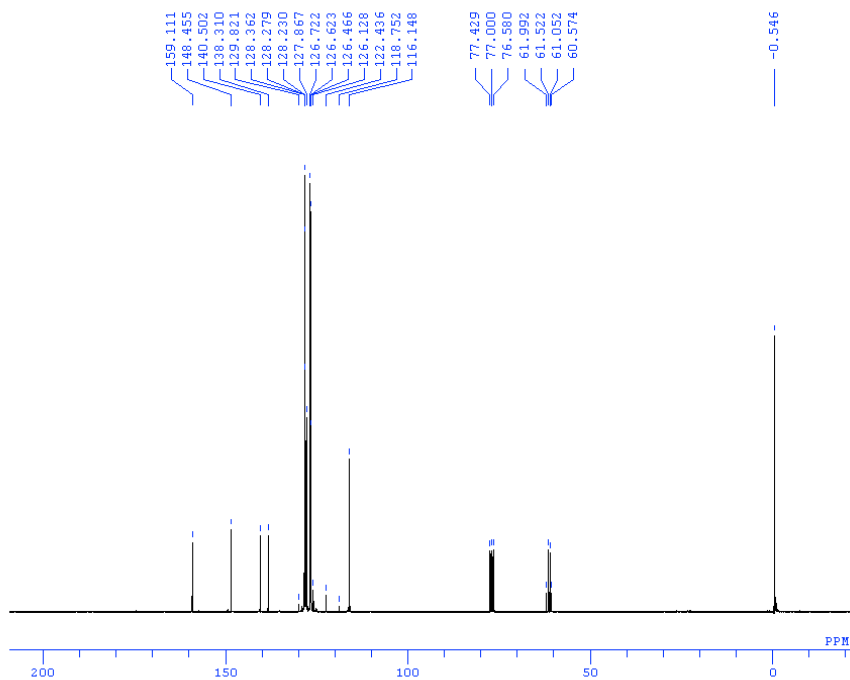

DFILE D:\NMR\_Users\Xi Zhe  
 COMNT  
 DATIM Sat Jan 30 12:24:33  
 OBNUC 13C  
 EXMOD BCM  
 OBFRQ 75.45 MHz  
 OBSSET 124.00 KHz  
 OBFIN 1840.0 Hz  
 POINT 32768  
 FREQU 20408.1 Hz  
 SCANS 2024  
 ACQTM 1.606 sec  
 PD 1.394 sec  
 PW1 5.0 us  
 IRNUC 1H  
 CTEMP 19.0 c  
 SLVNT CDCl3  
 EXREF 77.00 ppm  
 BF 0.62 Hz  
 RGAIN 27

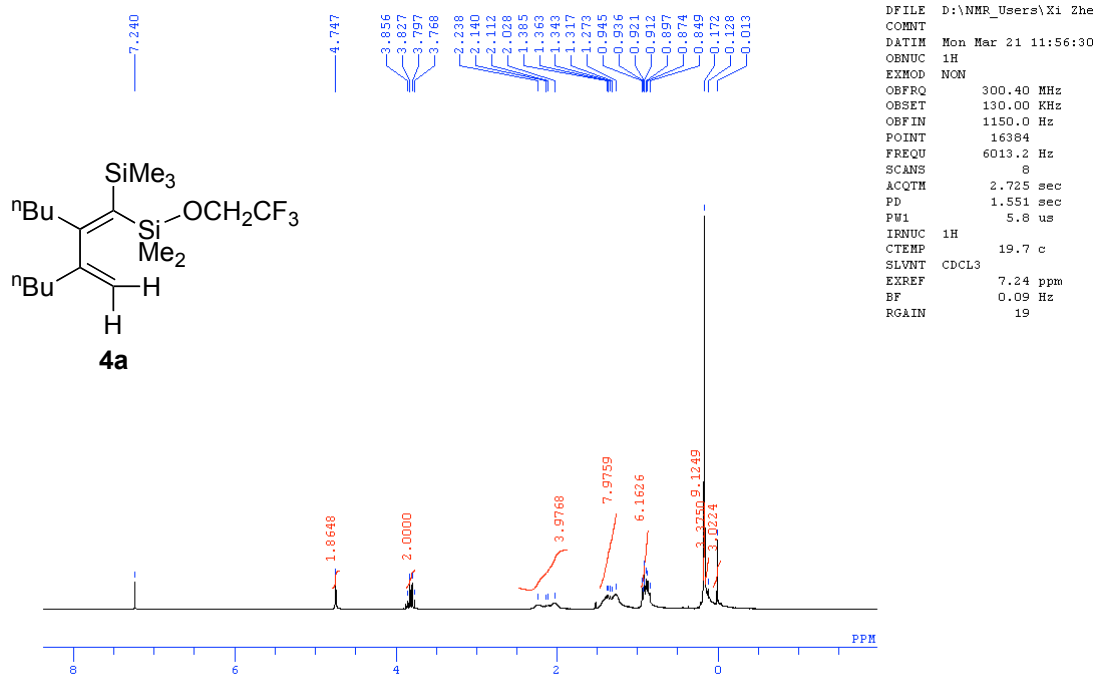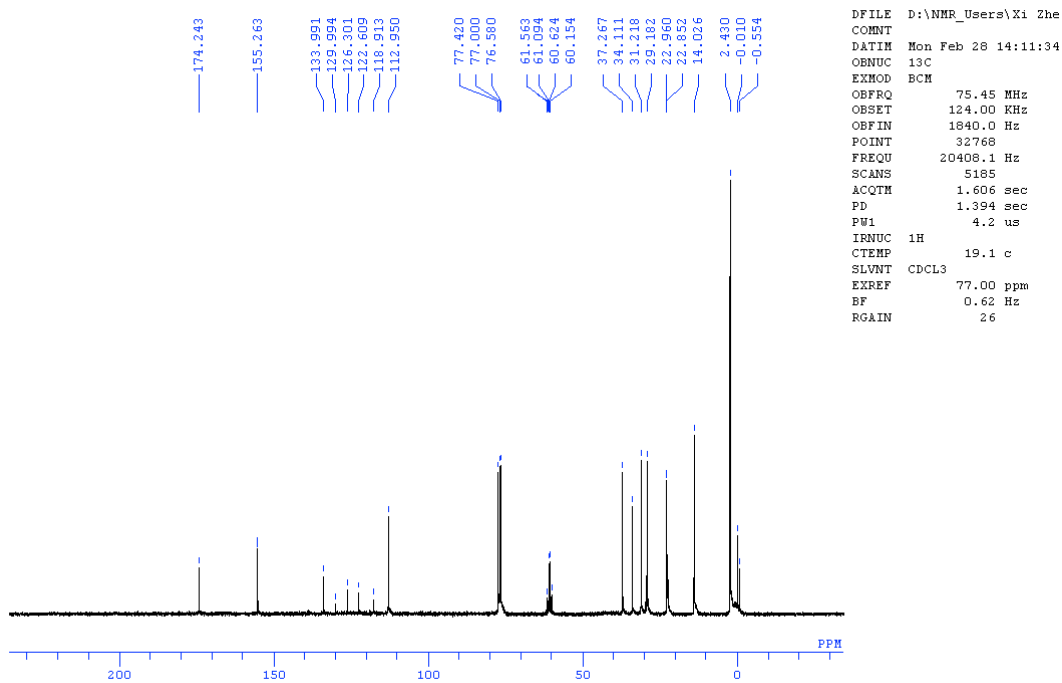

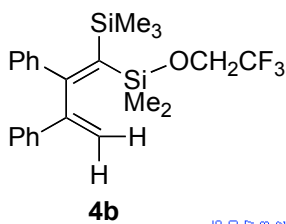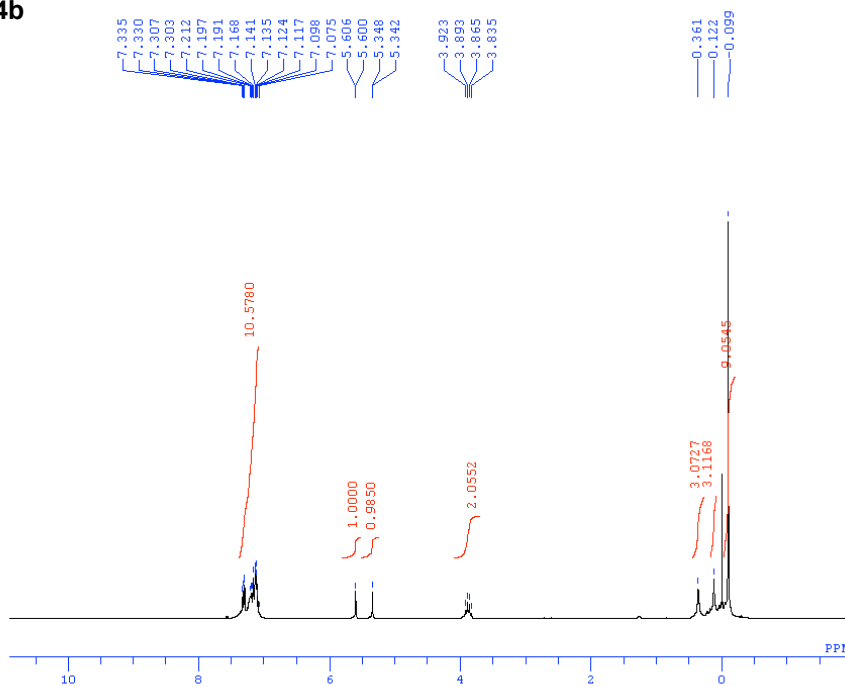

DFILE D:\NMR\_Users\Xi Zhe  
 COMNT  
 DATIM Fri Apr 25 20:45:27  
 OBNUC 1H  
 EXMOD NQW  
 OBFREQ 300.40 MHz  
 OBSSET 130.00 KHz  
 OBFIN 1150.0 Hz  
 POINT 32768  
 FREQU 6013.2 Hz  
 SCANS 16  
 ACQTM 5.449 sec  
 PD 1.551 sec  
 PM1 5.8 us  
 IRNUC 1H  
 CTEMP 22.8 c  
 SLVNT CDCL3  
 EXREF 0.00 ppm  
 BF 0.09 Hz  
 RGAIN 13

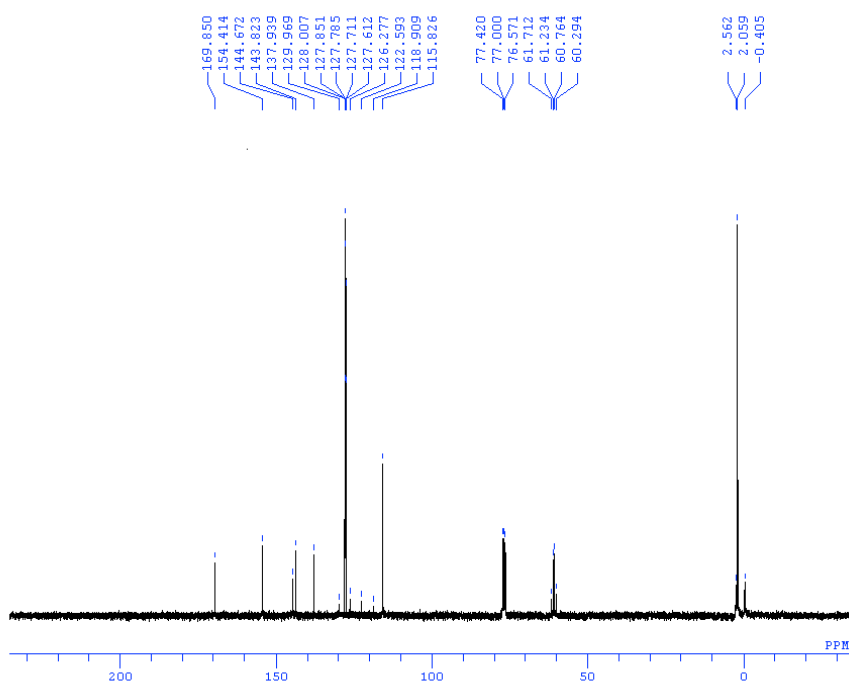

DFILE D:\NMR\_Users\Xi Zhe  
 COMNT  
 DATIM Fri Apr 25 20:15:39  
 OBNUC 13C  
 EXMOD BCM  
 OBFREQ 75.45 MHz  
 OBSSET 124.00 KHz  
 OBFIN 1840.0 Hz  
 POINT 32768  
 FREQU 20408.1 Hz  
 SCANS 336  
 ACQTM 1.606 sec  
 PD 1.394 sec  
 PM1 5.0 us  
 IRNUC 1H  
 CTEMP 23.2 c  
 SLVNT CDCL3  
 EXREF 77.00 ppm  
 BF 0.62 Hz  
 RGAIN 26





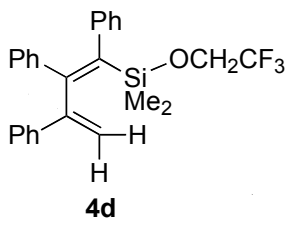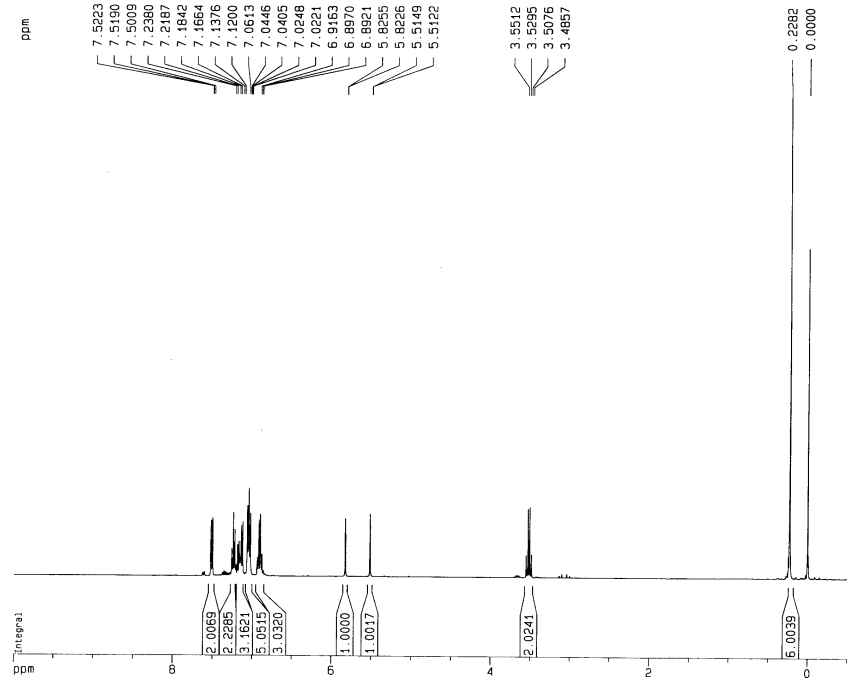

Current Data Parameters  
 NAME n04672  
 EXPNO 1  
 PROCNO 1

F2 - Acquisition Parameters  
 Date\_ 20100204  
 Time 13.54  
 INSTRUM ARX400  
 PROBHD 5 mm Multinu  
 PULPROG zg  
 TD 32768  
 SOLVENT CDCl3  
 NS 8  
 DS 0  
 SWH 8064.516 Hz  
 FIDRES 0.246110 Hz  
 AQ 2.0316660 sec  
 RG 64  
 DW 62.000 usec  
 DE 88.57 usec  
 TE 300.0 K  
 D1 2.00000000 sec  
 P1 3.00 usec  
 DE 88.57 usec  
 SFO1 400.1320153 MHz  
 NUCLEUS 1H

F2 - Processing parameters  
 SI 16384  
 SF 400.1300415 MHz  
 WDW no  
 SSB 0  
 LB 0.00 Hz  
 GB 0  
 PC 4.00

1D NMR plot parameters  
 CX 20.00 cm  
 F1P 10.000 ppm  
 F1 4001.30 Hz  
 F2P -0.500 ppm  
 F2 -200.07 Hz  
 PPMCM 0.52500 ppm/cm  
 HZCM 210.06827 Hz/cm

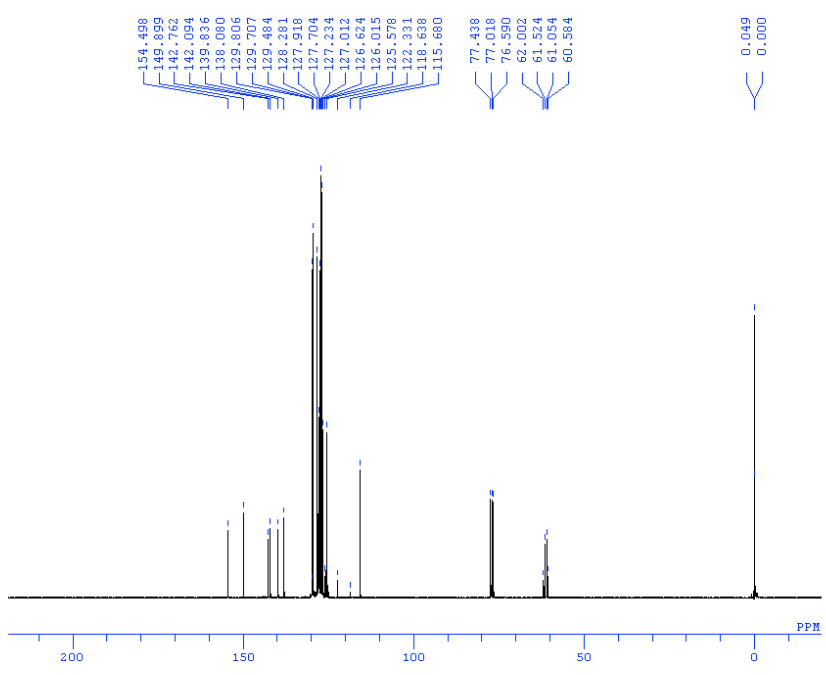

DFILE D:\NMR\_Users\Xi Zhe  
 COMNT  
 DATIM Thu Feb 04 10:32:14  
 OBNUC 13C  
 EXMOD BCM  
 OBFRQ 75.45 MHz  
 OBSSET 124.00 KHz  
 OBFIN 1840.0 Hz  
 POINT 32768  
 FREQU 20408.1 Hz  
 SCANS 1017  
 ACQTH 1.606 sec  
 PD 1.394 sec  
 PW1 5.0 us  
 IRNUC 1H  
 CTEMP 20.7 c  
 SLVNT CDCL3  
 EXREF 0.00 ppm  
 BF 0.62 Hz  
 RGAIN 26

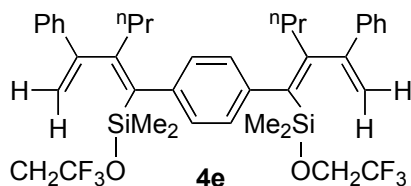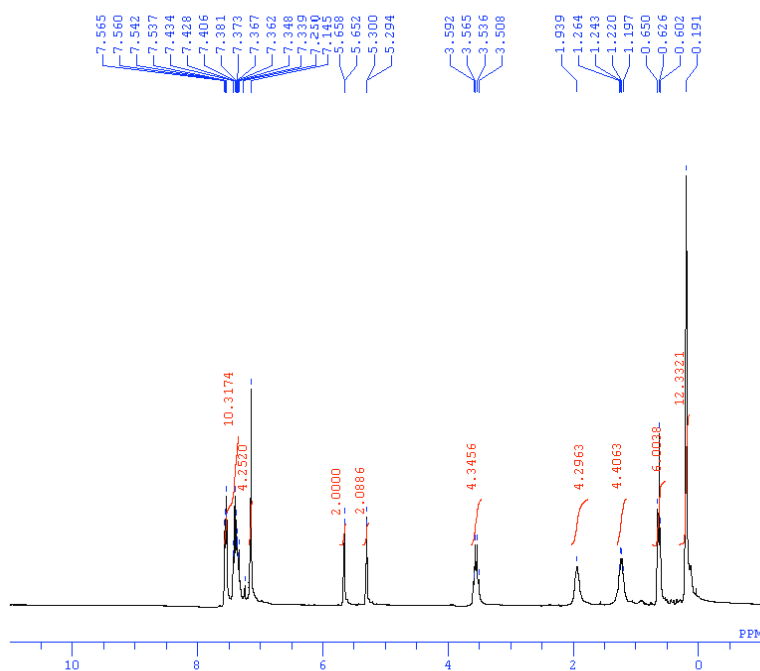

DFILE D:\NMR\_Users\Xi ZhenFeng\LUO  
 COMNT  
 DATIM Fri Dec 04 18:05:31 2009  
 OBNUC 1H  
 EXMOD NOM  
 OBFRQ 300.40 MHz  
 OBSET 130.00 KHz  
 OBFIN 1150.0 Hz  
 POINT 32768  
 FREQU 6013.2 Hz  
 SCANS 16  
 ACQTM 5.449 sec  
 PD 1.551 sec  
 PW1 5.8 us  
 IRNUC 1H  
 CTEMP 14.2 c  
 SLVNT CDCL3  
 EXREF 7.25 ppm  
 BF 0.09 Hz  
 RGAIN 12

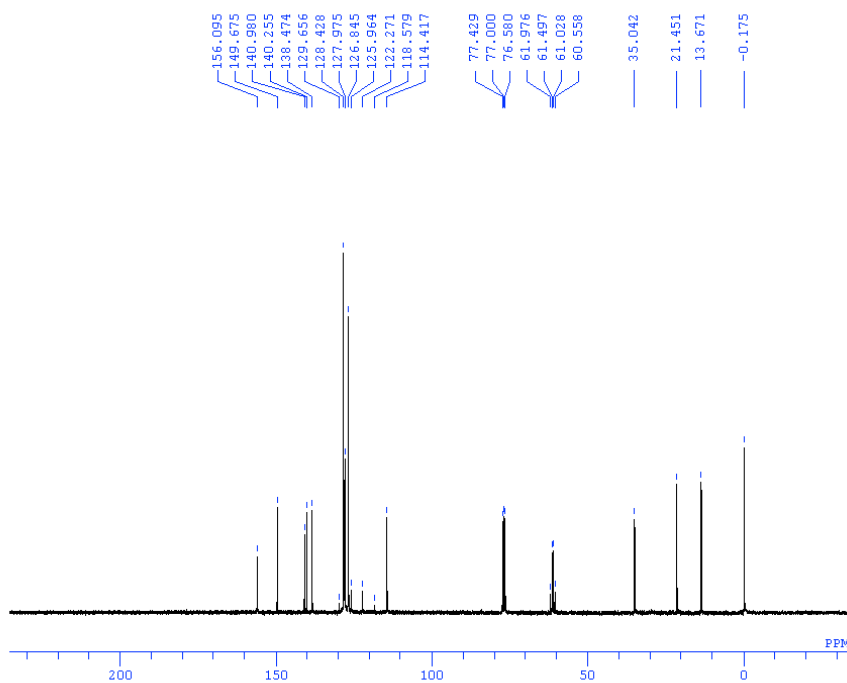

DFILE D:\NMR\_Users\Xi Zhe  
 COMNT  
 DATIM Fri Dec 04 18:01:23  
 OBNUC 13C  
 EXMOD BCM  
 OBFRQ 75.45 MHz  
 OBSET 124.00 KHz  
 OBFIN 1840.0 Hz  
 POINT 32768  
 FREQU 20408.1 Hz  
 SCANS 800  
 ACQTM 1.606 sec  
 PD 1.394 sec  
 PW1 5.0 us  
 IRNUC 1H  
 CTEMP 14.6 c  
 SLVNT CDCL3  
 EXREF 77.00 ppm  
 BF 0.62 Hz  
 RGAIN 25

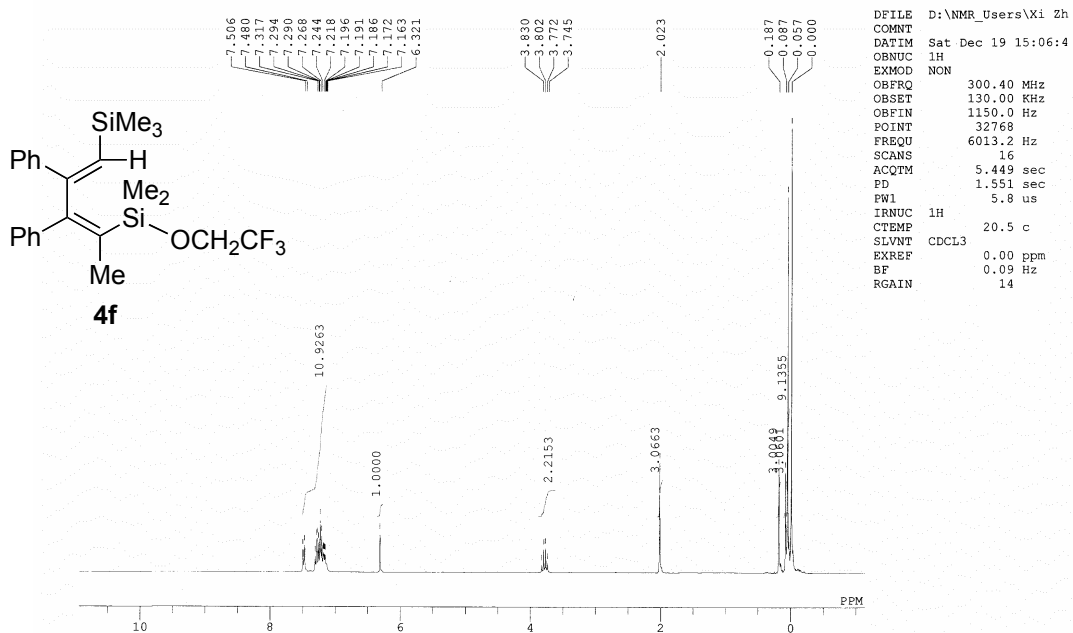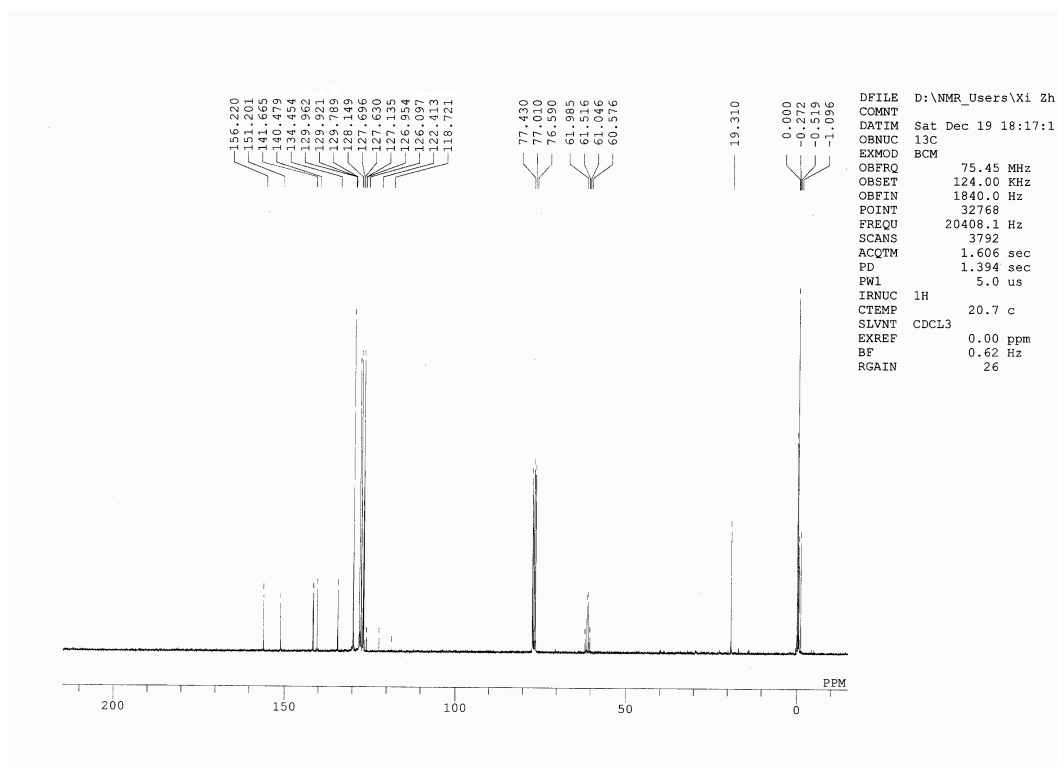

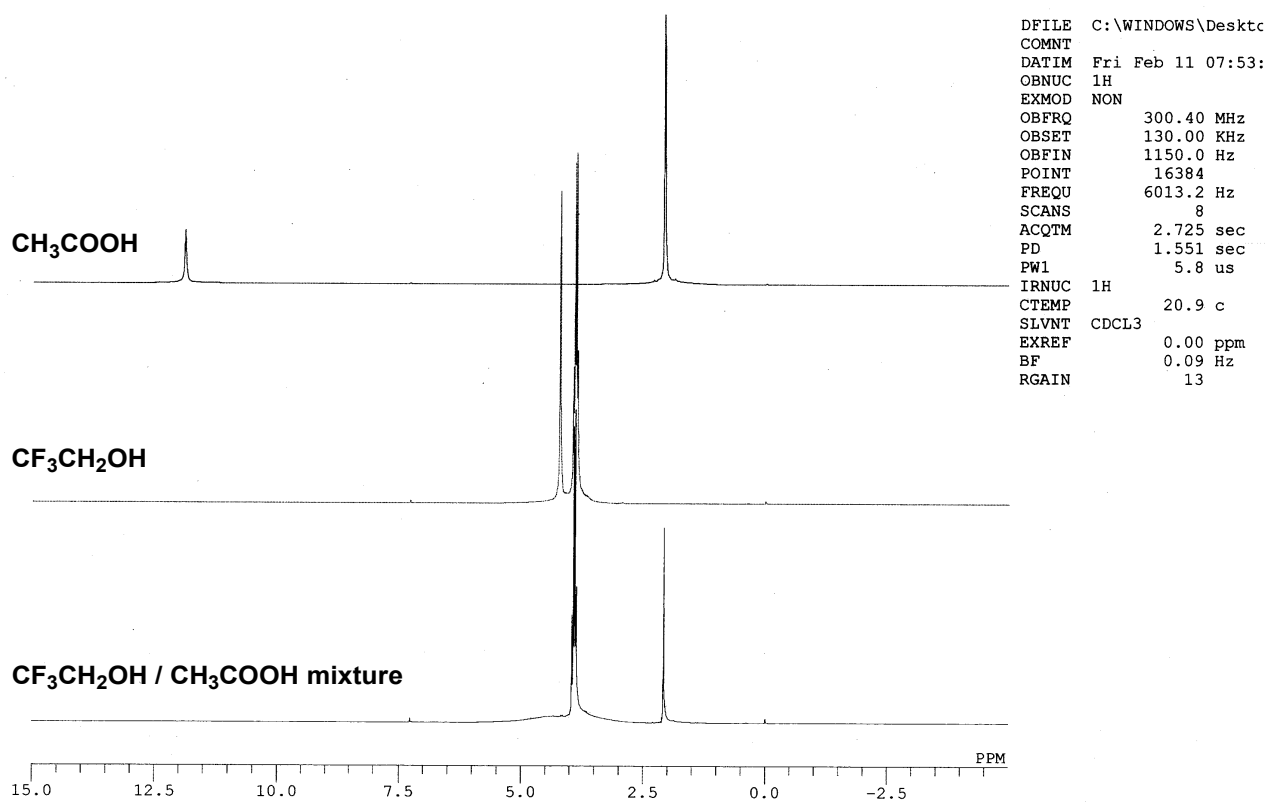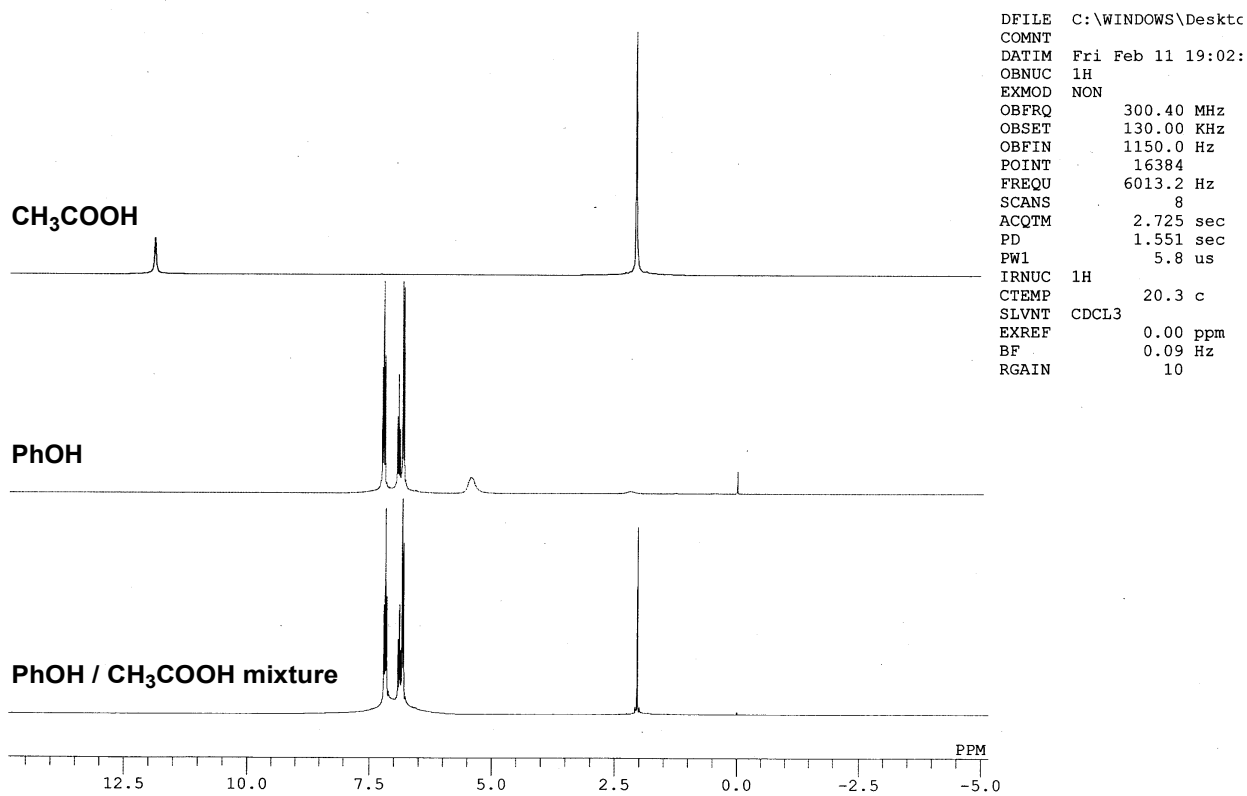

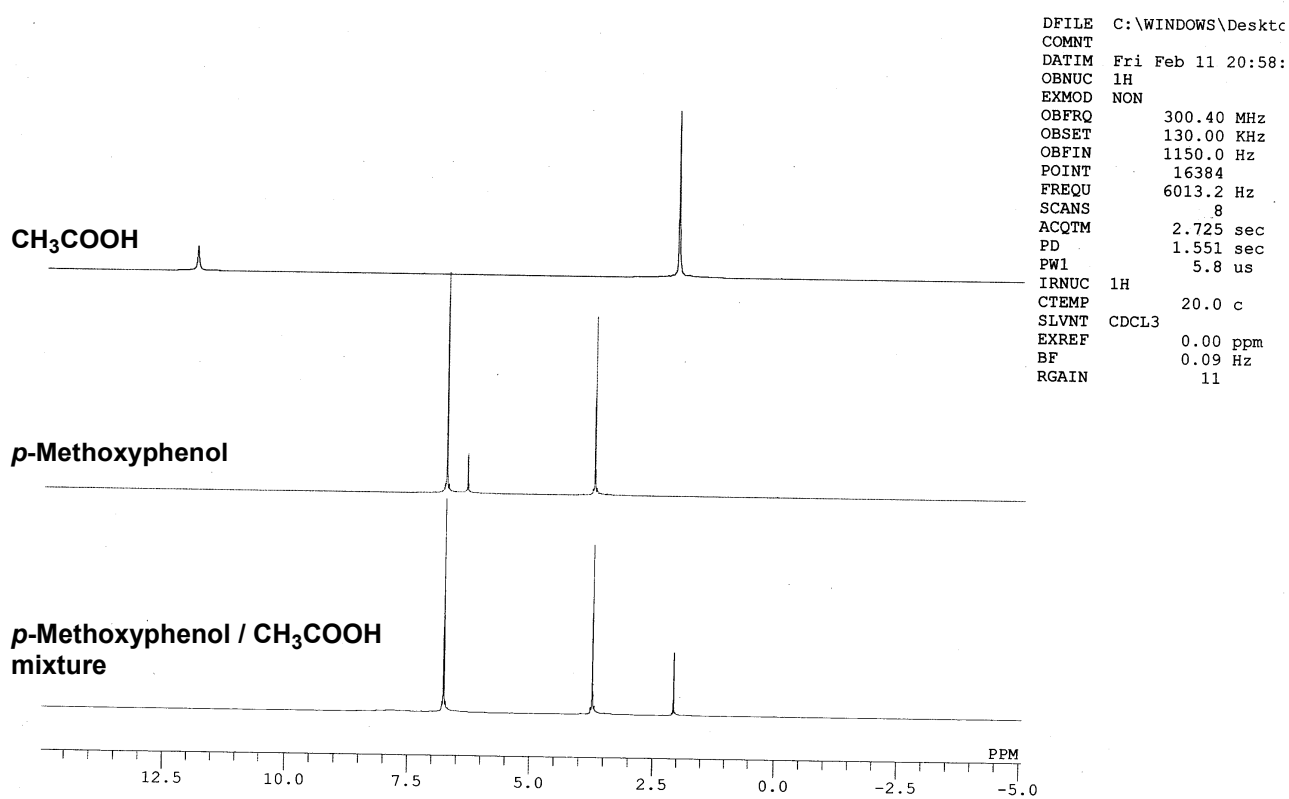

Supplement: c1sc00356a.pdf [file c1sc00356a.pdf]
